# Supplementary material
Source: publisher site journal article supplement (https://neobiota.pensoft.net/article/58038/download/suppl/31/)
Supplement: Supplementary file 1

## Sheet: full_dataset
Cost_ID	Repository	Reference_ID	Reference_title	Authors	Abstract	Publication_year	Language	Type_of_material	Previous_materials	Availability	Kingdom	Phylum	Class	Order	Family	Genus	Species	Subspecies	Common_name	Environment	Environment_IAS	Island	HabitatVerbatim	Habitat	protectedArea	Geographic_region	Official_country	State|Province|Administrative_area	Location	Spatial_scale	Period_of_estimation	Time_range	Probable_starting_year	Probable_ending_year	Probable_starting_year_adjusted	Probable_ending_year_adjusted	Occurrence	Raw_cost_estimate_local_currency	Min_Raw_cost_estimate_local_currency	Max_Raw_cost_estimate_local_currency	Raw_cost_estimate_2017_USD_exchange_rate	Raw_cost_estimate_2017_USD_PPP	Cost_estimate_per_year_local_currency	Cost_estimate_per_year_2017_USD_exchange_rate	Cost_estimate_per_year_2017_USD_PPP	Currency	Applicable_year	Type_of_applicable_year	Implementation
43	WoS	13502	Damage reduction estimates and benefit-cost ratios for feral swine control from the last remnant of a basin marsh system in Florida	Engeman et al		2004	English	Peer-reviewed article	NA	Yes	Animalia	Chordata	Mammalia	Artiodactyla	Suidae	Sus	Sus scrofa		Feral pig	Terrestrial	terrestrial				Y	North America	USA		Florida (Savannas Preserve State Park)	Unit (Park)	2004	Year	2004	Unspecified	2004	2004	Potentially ongoing	501110	235355	766865	650306	650306	501110	650306	650306	USD	2004	Publication year	Observed
44	WoS	13502	Damage reduction estimates and benefit-cost ratios for feral swine control from the last remnant of a basin marsh system in Florida	Engeman et al		2004	English	Peer-reviewed article	NA	Yes	Animalia	Chordata	Mammalia	Artiodactyla	Suidae	Sus	Sus scrofa		Feral pig	Terrestrial	terrestrial				Y	North America	USA		Florida (Savannas Preserve State Park)	Unit (Park)	2003-2004	Year	2003	2004	2004	2004	One-time	2136310	1003355	3269265	2.77235e+06	2.77235e+06	2136310	2.77235e+06	2.77235e+06	USD	2004	Publication year	Observed
45	TC	548	The amount and economic cost of feral swine damage to the last remnant of a basinmarsh system in Florida	Engeman et al		2005	English	Peer-reviewed article	In Engeman, R. M., Smith, H. T., Severson, R., Severson, M. A., Woolard, J., Shwiff, S. A., … Griffin, D. (2004). Damage reduction estimates and benefit-cost ratios for feral swine control from the last remnant of a basin marsh system in Florida. Environmental Conservation, 31(3), 207–211. https://doi.org/10.1017/S0376892904001572	Yes	Animalia	Chordata	Mammalia	Artiodactyla	Suidae	Sus	Sus scrofa		Feral pig	Terrestrial	terrestrial				Y	North America	USA		Florida (Savannas Preserve State Park)	Unit (Park)	2003	Year	2003	Unspecified	2003	2003	Potentially ongoing	2637525	1238760	4036290	3.31048e+06	3.31048e+06	2637525	3.31048e+06	3.31048e+06	USD	2005	Publication year	Observed
46	WoS	13502	Damage reduction estimates and benefit-cost ratios for feral swine control from the last remnant of a basin marsh system in Florida	Engeman et al		2004	English	Peer-reviewed article	NA	Yes	Animalia	Chordata	Mammalia	Artiodactyla	Suidae	Sus	Sus scrofa		Feral pig	Terrestrial	terrestrial				Y	North America	USA		Florida (Savannas Preserve State Park)	Unit (Park)	2003	Year	2003	Unspecified	2003	2003	Potentially ongoing	7500			9732.98	9732.98	7500	9732.98	9732.98	USD	2004	Publication year	Observed
48	WoS	13819	Prevalence and economic value of feral swine damage to native habitat in three Florida state parks	Engeman et al		2003	English	Peer-reviewed article	NA	Yes	Animalia	Chordata	Mammalia	Artiodactyla	Suidae	Sus	Sus scrofa		Feral pig	Terrestrial	terrestrial				Y	North America	USA		Unspecified	Unit (Ha)	Late winter 2002/Spring 2002/mid-winter 2003	Year	2003	2003	2003	2003	Potentially ongoing	10307	5331	15283	13733.8	13733.8	10307	13733.8	13733.8	USD	2003	Publication year	Observed
49	WoS	13819	Prevalence and economic value of feral swine damage to native habitat in three Florida state parks	Engeman et al		2003	English	Peer-reviewed article	NA	Yes	Animalia	Chordata	Mammalia	Artiodactyla	Suidae	Sus	Sus scrofa		Feral pig	Terrestrial	terrestrial				Y	North America	USA		Unspecified	Unit (Ha)	Late winter 2002/Spring 2002/mid-winter 2003	Year	2003	2003	2003	2003	Potentially ongoing	11907	4621	19193	15865.8	15865.8	11907	15865.8	15865.8	USD	2003	Publication year	Observed
50	WoS	13819	Prevalence and economic value of feral swine damage to native habitat in three Florida state parks	Engeman et al		2003	English	Peer-reviewed article	NA	Yes	Animalia	Chordata	Mammalia	Artiodactyla	Suidae	Sus	Sus scrofa		Feral pig	Terrestrial	terrestrial				Y	North America	USA		Unspecified	Unit (Ha)	Late winter 2002/Spring 2002/mid-winter 2003	Year	2003	2003	2003	2003	Potentially ongoing	15994	9241	22747	21311.6	21311.6	15994	21311.6	21311.6	USD	2003	Publication year	Observed
51	WoS	13819	Prevalence and economic value of feral swine damage to native habitat in three Florida state parks	Engeman et al		2003	English	Peer-reviewed article	NA	Yes	Animalia	Chordata	Mammalia	Artiodactyla	Suidae	Sus	Sus scrofa		Feral pig	Terrestrial	terrestrial				Y	North America	USA		Unspecified	Unit (Ha)	2000	Year	2000	Unspecified	2000	2000	One-time	5305			7229.24	7229.24	5305	7229.24	7229.24	USD	2002	Effective	Observed
67	WoS	9779	The economic impacts to commercial farms from invasive monkeys in Puerto Rico	Engeman et al		2010	English	Peer-reviewed article	NA	Yes	Animalia	Chordata	Mammalia	Primates	Cercopithecidae	Erythrocebus/Macaca	Erythrocebus patas/Macaca mulatta		Patas monkeys/Rhesus macaques	Terrestrial	terrestrial					Central America	USA		Puerto Rico	Country	2002-2006	Year	2002	2006	2002	2006	Potentially ongoing	326000			366462	460754	326000	366462	460754	USD	2010	Publication year	Observed
68	WoS	9779	The economic impacts to commercial farms from invasive monkeys in Puerto Rico	Engeman et al		2010	English	Peer-reviewed article	NA	Yes	Animalia	Chordata	Mammalia	Primates	Cercopithecidae	Erythrocebus/Macaca	Erythrocebus patas/Macaca mulatta		Patas monkeys/Rhesus macaques	Terrestrial	terrestrial					Central America	USA		Puerto Rico	Country	2002-2006	Year	2002	2006	2002	2006	One-time	1328200			1.49305e+06	1.87722e+06	1328200	1.49305e+06	1.87722e+06	USD	2010	Publication year	Observed
69	WoS	9779	The economic impacts to commercial farms from invasive monkeys in Puerto Rico	Engeman et al		2010	English	Peer-reviewed article	NA	Yes	Animalia	Chordata	Mammalia	Primates	Cercopithecidae	Erythrocebus/Macaca	Erythrocebus patas/Macaca mulatta		Patas monkeys/Rhesus macaques	Terrestrial	terrestrial					Central America	USA		Puerto Rico	Country	2002-2006	Year	2002	2006	2002	2006	One-time	39900			44852.2	56393	39900	44852.2	56393	USD	2010	Publication year	Observed
70	WoS	9779	The economic impacts to commercial farms from invasive monkeys in Puerto Rico	Engeman et al		2010	English	Peer-reviewed article	NA	Yes	Animalia	Chordata	Mammalia	Primates	Cercopithecidae	Erythrocebus/Macaca	Erythrocebus patas/Macaca mulatta		Patas monkeys/Rhesus macaques	Terrestrial	terrestrial					Central America	USA		Puerto Rico	Country	2002-2006	Year	2002	2006	2002	2006	Potentially ongoing	197500			215219	269789	197500	215219	269789	USD	2011	Publication year	Potential
113	WoS	12955	Regional Perspectives and Opportunities for Feral Hog Management in Texas	Adams et al		2005	English	Peer-reviewed article	NA	Yes	Animalia	Chordata	Mammalia	Artiodactyla	Suidae	Sus	Sus scrofa		Feral pig	Terrestrial	terrestrial					North America	USA		Texas	Site	1990's - today (today = 2003, publication year)	Period	1990	2003	1990	2003	Potentially ongoing	2.78406e+06			3.2448e+06	3.2448e+06	184657	231772	231772	USD	2005	Publication year	Observed
114	WoS	12955	Regional Perspectives and Opportunities for Feral Hog Management in Texas	Adams et al		2005	English	Peer-reviewed article	NA	Yes	Animalia	Chordata	Mammalia	Artiodactyla	Suidae	Sus	Sus scrofa		Feral pig	Terrestrial	terrestrial					North America	USA		Texas	Site	1990's - today (today = 2003, publication year)	Period	1990	2003	1990	2003	One-time	464676			541577	541577	30820.4	38684.1	38684.1	USD	2005	Publication year	Observed
134	TC	491	Reducing Risk and Enhancing Efficiency in Non-Native Vertebrate Removal Efforts on Islands: A 25 Year Multi-Taxa Retrospective from Santa Cruz Island, California	Morrison		2007	English	Book chapter	Parkes et al. 2017 Eradicating mammals on New Zealand island reserves: What is left to do?	Yes	Animalia	Chordata	Mammalia	Artiodactyla	Suidae	Sus	Sus scrofa		Feral pig	Terrestrial	terrestrial					North America	USA		California (Santa Cruz Island)	Site	2 years	Period	2005	2007	2005	2007	One-time	3900000			4.61057e+06	4.61057e+06	1950000	2.30528e+06	2.30528e+06	USD	2007	Publication year	Observed
135	TC	299	Eradication of feral pigs (Sus scrofa) on Santa Catalina Island, California	Schuyler et al		2002	English	Peer-reviewed article	Morrison, S. a. (2007). Reducing Risk and Enhancing Efficiency in Non-Native Vertebrate Removal Efforts on Islands: A 25 Year Multi-Taxa Retrospective from Santa Cruz Island, California. Managing Vertebrate Invasive Species, (August), 398–409. Retrieved from http://digitalcommons.unl.edu/cgi/viewcontent.cgiUnknownarticle=1030&context=nwrcinvasive	Yes	Animalia	Chordata	Mammalia	Artiodactyla	Suidae	Sus	Sus scrofa		Feral pig	Terrestrial	terrestrial					North America	USA		California (Catalina Island)	Site	1990-2001	Period	1990	2001	1990	2001	One-time	2.04388e+06			2.78524e+06	2.78524e+06	170323	232103	232103	USD	2002	Publication year	Observed
136	TC	299	Eradication of feral pigs (Sus scrofa) on Santa Catalina Island, California	Schuyler et al		2002	English	Official report	Reaser, J. K., Meerson, L. a., Cronk, Q., & Poorter, M. D. (2007). Ecological and socioeconomic impacts of invasive alien species in island ecosystems. Environmental Conservation, 34(June), 98–111. https://doi.org/10.1017/S0376892907003815	No	Animalia	Chordata	Mammalia	Artiodactyla	Suidae	Sus	Sus scrofa		Feral pig	Terrestrial	terrestrial					North America	USA		California (Catalina Island)	Site	1990-2001	Period	1990	2001	1990	2001	One-time	3.4642e+06			4.72074e+06	4.72074e+06	288683	393395	393395	USD	2002	Publication year	Observed
137	TC	491	Reducing Risk and Enhancing Efficiency in Non-Native Vertebrate Removal Efforts on Islands: A 25 Year Multi-Taxa Retrospective from Santa Cruz Island, California	Morrison		2007	English	Book chapter	Parkes et al. 2017 Eradicating mammals on New Zealand island reserves: What is left to do?	Yes	Animalia	Chordata	Mammalia	Artiodactyla	Suidae	Sus	Sus scrofa		Feral pig	Terrestrial	terrestrial				Y	North America	USA		California (Catalina Island)	Site	1990-2005	Period	1990	2005	1990	2005	One-time	3.43095e+06			4.05605e+06	4.05605e+06	214434	253503	253503	USD	2007	Publication year	Observed
139	WoS	1396	Eradicating mammals on New Zealand island reserves: What is left to do?	Parkes et al		2017	English	Peer-reviewed article	NA	Yes	Animalia	Chordata	Mammalia	Carnivora	Felidae	Felis	Felis catus		Feral Cat	Terrestrial	terrestrial					North America	USA		San Nicolas	Site	2009-2010	Year	2009	2010	2010	2010	One-time	1271500			1.42931e+06	1.42931e+06	1271500	1.42931e+06	1.42931e+06	USD	2010	Effective	Observed
140	TC	501	Review of feral cat eradications on islands. Island Invasives: Eradication and Management	Campbell et al		2011	English	Book chapter	NA	Yes	Animalia	Chordata	Mammalia	Carnivora	Felidae	Felis	Felis catus		Feral Cat	Terrestrial	terrestrial					Oceania/Pacific Islands	USA		Wake Atoll	Site	1996-2004	Period	1996	2004	1996	2004	One-time	206000			235366	235366	22888.9	26151.7	26151.7	USD	2009	Effective	Observed
156	WoS	2658	Defending against disparate marine turtle nest predators: Nesting success benefits from eradicating invasive feral swine and caging nests from raccoons	Engeman et al		2016	English	Peer-reviewed article	NA	Yes	Animalia	Chordata	Mammalia	Artiodactyla	Suidae	Sus	Sus scrofa		Feral pig	Terrestrial	terrestrial					North America	USA		Florida (Keewaydin Island)	Site	2008	Year	2008	2008	2008	2008	One-time	14020			14318.6	14318.6	14020	14318.6	14318.6	USD	2016	Publication year	Observed
157	WoS	2658	Defending against disparate marine turtle nest predators: Nesting success benefits from eradicating invasive feral swine and caging nests from raccoons	Engeman et al		2016	English	Peer-reviewed article	NA	Yes	Animalia	Chordata	Mammalia	Artiodactyla	Suidae	Sus	Sus scrofa		Feral pig	Terrestrial	terrestrial					North America	USA		Florida (Keewaydin Island)	Site	2007	Year	2007	2007	2007	2007	Potentially ongoing	379100			387175	387175	379100	387175	387175	USD	2016	Publication year	Observed
159	WoS	10001	An evaluation of feral cat management options using a decision analysis network	Loyd and DeVore		2010	English	Peer-reviewed article	NA	Yes	Animalia	Chordata	Mammalia	Carnivora	Felidae	Felis	Felis catus		Feral Cat	Terrestrial	terrestrial					North America	USA		Athens/Georgia	Unit (Animal)	2010	Year	2010	2010	2010	2010	One-time	137	71	203	154	154	137	154	154	USD	2010	Publication year	Potential
207	WoS	12448	Costing eradications of alien mammals from islands	Martins et al		2006	English	Peer-reviewed article	NA	Yes	Animalia	Chordata	Mammalia	Rodentia	Muridae	Rattus	Rattus sp.		Rats	Terrestrial	terrestrial					Oceania/Pacific Islands	USA		Palmyra Atoll	Site	2001	Year	2001	Unspecified	2001	2001	Potentially ongoing	111007			147914	147914	111007	147914	147914	USD	2003	Effective	Observed
224	WoS	12268	Feral swine management for conservation of an imperiled wetland habitat: Florida's vanishing seepage slopes	Engeman et al		2007	English	Peer-reviewed article	NA	Yes	Animalia	Chordata	Mammalia	Artiodactyla	Suidae	Sus	Sus scrofa		Feral pig	Terrestrial	terrestrial					North America	USA		Florida	Site	2003-2005	Period	2003	2005	2003	2005	Potentially ongoing	8746061			1.03396e+07	1.03396e+07	2.91535e+06	3.44652e+06	3.44652e+06	USD	2007	Publication year	Observed
225	WoS	12268	Feral swine management for conservation of an imperiled wetland habitat: Florida's vanishing seepage slopes	Engeman et al		2007	English	Peer-reviewed article	NA	Yes	Animalia	Chordata	Mammalia	Artiodactyla	Suidae	Sus	Sus scrofa		Feral pig	Terrestrial	terrestrial					North America	USA		Florida	Site	2003-2004	Year	2003	2004	2004	2004	One-time	82352.9			97357.4	97357.4	82352.9	97357.4	97357.4	USD	2007	Publication year	Observed
226	WoS	12268	Feral swine management for conservation of an imperiled wetland habitat: Florida's vanishing seepage slopes	Engeman et al		2007	English	Peer-reviewed article	NA	Yes	Animalia	Chordata	Mammalia	Artiodactyla	Suidae	Sus	Sus scrofa		Feral pig	Terrestrial	terrestrial					North America	USA		Florida	Site	2005	Year	2005	2005	2005	2005	Potentially ongoing	2.23529e+06			2642558	2642558	2.23529e+06	2642558	2642558	USD	2007	Publication year	Potential
332	TC	530	Status of feral pig management and research in Hawaii Volcanoes National Park	Stone and Taylor		1984	English	Conference proceedings	In Choquenot, D., McIlroy, J., & Koen, T. (1996). Managing vertebrate pests: feral pigs. Bureau of Resource Sciences, 1–171. Retrieved from http://adl.brs.gov.au/data/warehouse/mvpfpr9abr_001/mvpfpr9abr_0010111a/12953_pigguide.doc	Yes	Animalia	Chordata	Mammalia	Artiodactyla	Suidae	Sus	Sus scrofa		Feral pig	Terrestrial	terrestrial					Oceania/Pacific Islands	USA	Hawaii	Hawaii (Volcanoes National Park)	Unit (Animal)	1983-1984	Year	1983	1984	1984	1984	One-time	625	237	1013	1474.73	1510.97	625	1474.73	1510.97	USD	1984	Publication year	Observed
339	TC	225	Correction: Reporting costs for invasive vertebrate eradications	Holmes et al		2015	English	Peer-reviewed article	NA	Yes	Animalia	Chordata	Mammalia	Rodentia	Muridae	Diverse/Unspecified	Diverse/Unspecified		Rodents	Terrestrial	terrestrial					North America	USA		Navassa Atoll	Unit (471 Ha)	Unspecified	Year	Unspecified	Unspecified	2015	2015	One-time	1752000			1.84347e+06	1.84347e+06	1752000	1.84347e+06	1.84347e+06	USD	2013	Effective	Observed
340	TC	225	Correction: Reporting costs for invasive vertebrate eradications	Holmes et al		2015	English	Peer-reviewed article	NA	Yes	Animalia	Chordata	Mammalia	Diverse/Unspecified	Diverse/Unspecified	Diverse/Unspecified	Diverse/Unspecified		Predators	Terrestrial	terrestrial					North America	USA		Navassa Atoll	Unit (471 Ha)	Unspecified	Year	Unspecified	Unspecified	2015	2015	One-time	808000			850185	850185	808000	850185	850185	USD	2013	Effective	Observed
341	TC	225	Correction: Reporting costs for invasive vertebrate eradications	Holmes et al		2015	English	Peer-reviewed article	NA	Yes	Animalia	Chordata	Mammalia	Diverse/Unspecified	Diverse/Unspecified	Diverse/Unspecified	Diverse/Unspecified		Ungulates	Terrestrial	terrestrial					North America	USA		Navassa Atoll	Unit (471 Ha)	Unspecified	Year	Unspecified	Unspecified	2015	2015	One-time	672000			707085	707085	672000	707085	707085	USD	2013	Effective	Observed
342	TC	225	Correction: Reporting costs for invasive vertebrate eradications	Holmes et al		2015	English	Peer-reviewed article	NA	Yes	Animalia	Chordata	Mammalia	Diverse/Unspecified	Diverse/Unspecified	Diverse/Unspecified	Diverse/Unspecified		Predators	Terrestrial	terrestrial					Oceania/Pacific Islands	USA	Hawaii	Hawaii (Khoolawe)	Unit (11,700 Ha)	Unspecified	Year	Unspecified	Unspecified	2015	2015	One-time	2135000			2.24647e+06	2.24647e+06	2135000	2.24647e+06	2.24647e+06	USD	2013	Effective	Observed
343	TC	498	Response of Wedge-tailed Shearwaters ( Puffinus pacificus ) to Eradication of Black Rats (Rattus rattus) from Mokuauia Island after Reinvasion	Marie et al		2014	English	Peer-reviewed article	Holmes et al. 2015. Correction: Reporting costs for invasive vertebrate eradications	Yes	Animalia	Chordata	Mammalia	Rodentia	Muridae	Rattus	Rattus rattus		Black rat	Terrestrial	terrestrial				Y	Oceania/Pacific Islands	USA	Hawaii	Hawaii (Moku'auia)	Unit (5 Ha)	4 months (October 2011 to January 2012)	Year	2012	2012	2012	2012	One-time	1268			1312.9	1312.9	1268	1312.9	1312.9	USD	2014	Publication year	Observed
347	TC	328	FINAL ENVIRONMENTAL IMPACT STATEMENT. Palmyra Atoll National Wildlife Refuge Rat Eradication Project	United States Fish and Wildlife Service		2011	English	Official report	Holmes et al. 2016. Correction: Reporting costs for invasive vertebrate eradications	Yes	Animalia	Chordata	Mammalia	Rodentia	Muridae	Rattus	Rattus rattus		Black rat	Terrestrial	terrestrial				Y	Oceania/Pacific Islands	USA		Palmyra Atoll	Unit (250 Ha)	Unspecified	Year	Unspecified	Unspecified	2011	2011	One-time	1915900			2.01593e+06	2.01593e+06	1915900	2.01593e+06	2.01593e+06	USD	2013	Effective	Observed
357	WoS	6274	Rapid assessment of rat eradication after aerial baiting	Samaniego-Herrera et al		2013	English	Peer-reviewed article	NA	Yes	Animalia	Chordata	Mammalia	Rodentia	Muridae	Diverse/Unspecified	Diverse/Unspecified		Rodents	Terrestrial	terrestrial	Y			Y	North America	Mexico		Isabel island	Unit (82 Ha)	After 2009	Year	2009	Unspecified	2009	2009	One-time	39750			41825.3	67753.5	39750	41825.3	67753.5	USD	2013	Publication year	Observed
360	TC	294	Eradication of black rats Rattus rattus from Anacapa Island	Howald et al		2010	English	Peer-reviewed article	Holmes et al. 2016. Correction: Reporting costs for invasive vertebrate eradications	Yes	Animalia	Chordata	Mammalia	Rodentia	Muridae	Diverse/Unspecified	Diverse/Unspecified		Rodents	Terrestrial	terrestrial					North America	USA		Anacapa	Unit (296 Ha)	2 years	Period	2008	2010	2008	2010	One-time	1800000			1.89398e+06	1.89398e+06	900000	946988	946988	USD	2013	Effective	Observed
371	TC	598	The successful eradication of introduced roof rats (Rattus rattus) from Buck Island using diphacinone, followed by an irruption of house mice (Mus musculus)	Witmer et al		2007	English	Peer-reviewed article	Holmes et al. 2015. Correction: Reporting costs for invasive vertebrate eradications	Yes	Animalia	Chordata	Mammalia	Rodentia	Muridae	Diverse/Unspecified	Diverse/Unspecified		Rodents	Terrestrial	terrestrial				Y	North America	USA		Buck	Unit (80 Ha)	1998-2005	Year	1998	2005	1998	2005	One-time	33500			39603.6	39603.6	33500	39603.6	39603.6	USD	2007	Publication year	Observed
372	TC	298	Eradication of feral goats and pigs and consequences for other biota on Sarigan Island, Commonwealth of the Northern Mariana Islands.	Kessler		2002	English	Book chapter	Holmes et al. 2015. Correction: Reporting costs for invasive vertebrate eradications	Yes	Animalia	Chordata	Mammalia	Artiodactyla	Bovidae/Suidae	Capra/Sus	Capra hircus/Sus scrofa		Feral goat/Feral pig	Terrestrial	terrestrial					Oceania/Pacific Islands	USA		Sarigan	Unit (500 Ha)	3 months	Year	Unspecified	Unspecified	2002	2002	One-time	300000	180000	420000	315663	315663	300000	315663	315663	USD	2013	Effective	Observed
382	TC	487	Rapid eradication of feral pigs (Sus scrofa) from Santa Cruz Island, California. Biol Conserv 143:634–641	Parkes et al		2010	English	Peer-reviewed article	Holmes et al. 2015. Correction: Reporting costs for invasive vertebrate eradications	Yes	Animalia	Chordata	Mammalia	Artiodactyla	Suidae	Sus	Sus scrofa		Feral pig	Terrestrial	terrestrial				Y	North America	USA		California (Santa Cruz island)	Site	2005	Year	2005	2005	2005	2005	One-time	1789200			2.01127e+06	2.01127e+06	1789200	2.01127e+06	2.01127e+06	USD	2010	Publication year	Observed
387	WoS	6252	Multi-species predator eradication within a predator-proof fence at Kaena Point, Hawaii	Young et al		2013	English	Peer-reviewed article	NA	Yes	Animalia	Chordata	Mammalia	Carnivora	Canidae/Felidae/Herpestidae	Canis/Felis/Herpestes	Canis lupus/Felis catus/Herpestes javanicus		Feral cats/Feral dogs/Mongooses	Terrestrial	terrestrial					Oceania/Pacific Islands	USA	Hawaii	Hawaii (Ka'ena Point)	Site	2000-2011	Year	2000	2011	2000	2011	One-time	35000			36827.3	36827.3	35000	36827.3	36827.3	USD	2013	Publication year	Observed
388	WoS	6252	Multi-species predator eradication within a predator-proof fence at Kaena Point, Hawaii	Young et al		2013	English	Peer-reviewed article	NA	Yes	Animalia	Chordata	Mammalia	Carnivora	Canidae/Felidae/Herpestidae	Canis/Felis/Herpestes	Canis lupus/Felis catus/Herpestes javanicus		Feral cats/Feral dogs/Mongooses	Terrestrial	terrestrial					Oceania/Pacific Islands	USA	Hawaii	Hawaii (Ka'ena Point)	Site	2011	Year	2011	2011	2011	2011	One-time	290000			316017	316017	290000	316017	316017	USD	2011	Effective	Observed
389	WoS	6252	Multi-species predator eradication within a predator-proof fence at Kaena Point, Hawaii	Young et al		2013	English	Peer-reviewed article	NA	Yes	Animalia	Chordata	Mammalia	Carnivora	Canidae/Felidae/Herpestidae	Canis/Felis/Herpestes	Canis lupus/Felis catus/Herpestes javanicus		Feral cats/Feral dogs/Mongooses	Terrestrial	terrestrial					Oceania/Pacific Islands	USA	Hawaii	Hawaii (Ka'ena Point)	Site	2011	Year	2011	Unspecified	2011	2011	Potentially ongoing	4000			4358.86	4358.86	4000	4358.86	4358.86	USD	2011	Effective	Observed
390	WoS	6252	Multi-species predator eradication within a predator-proof fence at Kaena Point, Hawaii	Young et al		2013	English	Peer-reviewed article	NA	Yes	Animalia	Chordata	Mammalia	Carnivora	Canidae/Felidae/Herpestidae	Canis/Felis/Herpestes	Canis lupus/Felis catus/Herpestes javanicus		Feral cats/Feral dogs/Mongooses	Terrestrial	terrestrial					Oceania/Pacific Islands	USA	Hawaii	Hawaii (Ka'ena Point)	Site	9 months	Year	Unspecified	Unspecified	2013	2013	One-time	55504			60483.5	60483.5	55504	60483.5	60483.5	USD	2011	Effective	Observed
391	WoS	6252	Multi-species predator eradication within a predator-proof fence at Kaena Point, Hawaii	Young et al		2013	English	Peer-reviewed article	NA	Yes	Animalia	Chordata	Mammalia	Carnivora	Canidae/Felidae/Herpestidae	Canis/Felis/Herpestes	Canis lupus/Felis catus/Herpestes javanicus		Feral cats/Feral dogs/Mongooses	Terrestrial	terrestrial					Oceania/Pacific Islands	USA	Hawaii	Hawaii (Ka'ena Point)	Site	2011	Year	2011	Unspecified	2011	2011	Potentially ongoing	10000			10897.1	10897.1	10000	10897.1	10897.1	USD	2011	Effective	Observed
413	WoS	1129	Optimizing confirmation of invasive species eradication with rapid eradication assessment	Russell et al		2017	English	Peer-reviewed article	NA	Yes	Animalia	Chordata	Mammalia	Rodentia	Muridae	Mus	Mus musculus		House mouse	Terrestrial	terrestrial	Y			Y	North America	Mexico		Isla Pajaros/Isla Muertos	Site	2017	Year	2017	2017	2017	2017	One-time	312623			312623	430008	312623	312623	430008	USD	2017	Publication year	Observed
414	WoS	1129	Optimizing confirmation of invasive species eradication with rapid eradication assessment	Russell et al		2017	English	Peer-reviewed article	NA	Yes	Animalia	Chordata	Mammalia	Rodentia	Muridae	Mus	Mus musculus		House mouse	Terrestrial	terrestrial	Y			Y	North America	Mexico		Isla Pajaros/Isla Muertos	Site	2017	Year	2017	2017	2017	2017	One-time	15000			15000	20632.3	15000	15000	20632.3	USD	2017	Publication year	Observed
419	WoS	5924	Using digital data collection tools to improve overall cost-efficiency and provide timely analysis for decision making during invasive species eradication campaigns	Will et al		2014	English	Peer-reviewed article	NA	Yes	Animalia	Chordata	Mammalia	Carnivora	Felidae	Felis	Felis catus		Feral Cat	Terrestrial	terrestrial					North America	USA		San Nicolas	Site	2 years	Period	2013	2014	2012	2014	One-time	154765			160246	160246	51588.3	53415.2	53415.2	USD	2014	Effective	Observed
420	WoS	5924	Using digital data collection tools to improve overall cost-efficiency and provide timely analysis for decision making during invasive species eradication campaigns	Will et al		2014	English	Peer-reviewed article	NA	Yes	Animalia	Chordata	Mammalia	Rodentia	Muridae	Rattus	Rattus norvegicus		Brown rat	Terrestrial	terrestrial					North America	Canada		Haida Gwaii/British Columbia	Site	2 months	Year	Unspecified	Unspecified	2014	2014	One-time	53755			55658.6	50037.7	53755	55658.6	50037.7	USD	2014	Effective	Observed
423	WoS	1920	Economic estimates of feral swine damage and control in 11 US states	Anderson et al		2016	English	Peer-reviewed article	NA	Yes	Animalia	Chordata	Mammalia	Artiodactyla	Suidae	Sus	Sus scrofa		Feral pig	Terrestrial	terrestrial					North America	USA		Alabama	Site	2014	Year	2014	Unspecified	2014	2014	Potentially ongoing	21322000			2.27638e+07	2.27638e+07	21322000	2.27638e+07	2.27638e+07	USD	2012	Effective	Observed
424	WoS	1920	Economic estimates of feral swine damage and control in 11 US states	Anderson et al		2016	English	Peer-reviewed article	NA	Yes	Animalia	Chordata	Mammalia	Artiodactyla	Suidae	Sus	Sus scrofa		Feral pig	Terrestrial	terrestrial					North America	USA		Arkansas	Site	2014	Year	2014	Unspecified	2014	2014	Potentially ongoing	19575000			2.08987e+07	2.08987e+07	19575000	2.08987e+07	2.08987e+07	USD	2012	Effective	Observed
425	WoS	1920	Economic estimates of feral swine damage and control in 11 US states	Anderson et al		2016	English	Peer-reviewed article	NA	Yes	Animalia	Chordata	Mammalia	Artiodactyla	Suidae	Sus	Sus scrofa		Feral pig	Terrestrial	terrestrial					North America	USA		Florida	Site	2014	Year	2014	Unspecified	2014	2014	Potentially ongoing	5985000			6.38972e+06	6.38972e+06	5985000	6.38972e+06	6.38972e+06	USD	2012	Effective	Observed
426	WoS	1920	Economic estimates of feral swine damage and control in 11 US states	Anderson et al		2016	English	Peer-reviewed article	NA	Yes	Animalia	Chordata	Mammalia	Artiodactyla	Suidae	Sus	Sus scrofa		Feral pig	Terrestrial	terrestrial					North America	USA		Georgia	Site	2014	Year	2014	Unspecified	2014	2014	Potentially ongoing	5150000			5.49825e+06	5.49825e+06	5150000	5.49825e+06	5.49825e+06	USD	2012	Effective	Observed
427	WoS	1920	Economic estimates of feral swine damage and control in 11 US states	Anderson et al		2016	English	Peer-reviewed article	NA	Yes	Animalia	Chordata	Mammalia	Artiodactyla	Suidae	Sus	Sus scrofa		Feral pig	Terrestrial	terrestrial					North America	USA		Louisiana	Site	2014	Year	2014	Unspecified	2014	2014	Potentially ongoing	15670000			1.67296e+07	1.67296e+07	15670000	1.67296e+07	1.67296e+07	USD	2012	Effective	Observed
428	WoS	1920	Economic estimates of feral swine damage and control in 11 US states	Anderson et al		2016	English	Peer-reviewed article	NA	Yes	Animalia	Chordata	Mammalia	Artiodactyla	Suidae	Sus	Sus scrofa		Feral pig	Terrestrial	terrestrial					North America	USA		Mississippi	Site	2014	Year	2014	Unspecified	2014	2014	Potentially ongoing	18518000			1.97702e+07	1.97702e+07	18518000	1.97702e+07	1.97702e+07	USD	2012	Effective	Observed
429	WoS	1920	Economic estimates of feral swine damage and control in 11 US states	Anderson et al		2016	English	Peer-reviewed article	NA	Yes	Animalia	Chordata	Mammalia	Artiodactyla	Suidae	Sus	Sus scrofa		Feral pig	Terrestrial	terrestrial					North America	USA		Missouri	Site	2014	Year	2014	Unspecified	2014	2014	Potentially ongoing	486000			518864	518864	486000	518864	518864	USD	2012	Effective	Observed
430	WoS	1920	Economic estimates of feral swine damage and control in 11 US states	Anderson et al		2016	English	Peer-reviewed article	NA	Yes	Animalia	Chordata	Mammalia	Artiodactyla	Suidae	Sus	Sus scrofa		Feral pig	Terrestrial	terrestrial					North America	USA		North Carolina	Site	2014	Year	2014	Unspecified	2014	2014	Potentially ongoing	4684000			5.00074e+06	5.00074e+06	4684000	5.00074e+06	5.00074e+06	USD	2012	Effective	Observed
431	WoS	1920	Economic estimates of feral swine damage and control in 11 US states	Anderson et al		2016	English	Peer-reviewed article	NA	Yes	Animalia	Chordata	Mammalia	Artiodactyla	Suidae	Sus	Sus scrofa		Feral pig	Terrestrial	terrestrial					North America	USA		South Carolina	Site	2014	Year	2014	Unspecified	2014	2014	Potentially ongoing	8747000			9.33849e+06	9.33849e+06	8747000	9.33849e+06	9.33849e+06	USD	2012	Effective	Observed
432	WoS	1920	Economic estimates of feral swine damage and control in 11 US states	Anderson et al		2016	English	Peer-reviewed article	NA	Yes	Animalia	Chordata	Mammalia	Artiodactyla	Suidae	Sus	Sus scrofa		Feral pig	Terrestrial	terrestrial					North America	USA		Texas	Site	2014	Year	2014	Unspecified	2014	2014	Potentially ongoing	89817000			9.58906e+07	9.58906e+07	89817000	9.58906e+07	9.58906e+07	USD	2012	Effective	Observed
436	WoS	341	Effectiveness of a bounty program for reducing wild pig densities	Ditchkoff et al		2017	English	Peer-reviewed article	NA	Yes	Animalia	Chordata	Mammalia	Artiodactyla	Suidae	Sus	Sus scrofa		Feral pig	Terrestrial	terrestrial					North America	USA		Georgia (Fort Benning)	Site	June 2007-February 2008	Year	2008	2008	2008	2008	One-time	57296			57296	57296	57296	57296	57296	USD	2017	Publication year	Observed
467	WoS	2685	Plant community shifts caused by feral swine rooting devalue Florida rangeland	Bankovich et al		2016	English	Peer-reviewed article	NA	Yes	Animalia	Chordata	Mammalia	Artiodactyla	Suidae	Sus	Sus scrofa		Feral pig	Terrestrial	terrestrial					North America	USA		Central Florida	Site	2015	Year	2015	Unspecified	2015	2015	Potentially ongoing	16975.9	2160568	33951776	17337.5	17337.5	16975.9	17337.5	17337.5	USD	2016	Publication year	Observed
468	WoS	2685	Plant community shifts caused by feral swine rooting devalue Florida rangeland	Bankovich et al		2016	English	Peer-reviewed article	NA	Yes	Animalia	Chordata	Mammalia	Artiodactyla	Suidae	Sus	Sus scrofa		Feral pig	Terrestrial	terrestrial					North America	USA		Central Florida	Site	2015	Year	2015	Unspecified	2015	2015	Potentially ongoing	293146	190545	439718	299390	299390	293146	299390	299390	USD	2016	Publication year	Observed
469	WoS	12268	Feral Swine: Damage and Disease Threats	United States Department of Agriculture		2013	English	Fact sheet	NA	Yes	Animalia	Chordata	Mammalia	Artiodactyla	Suidae	Sus	Sus scrofa		Feral pig	Terrestrial	terrestrial					North America	USA		Unspecified	Country	2013	Year	2013	Unspecified	2013	2013	Potentially ongoing	1500000000			1578313781	1578313781	1500000000	1578313781	1578313781	USD	2013	Publication year	Observed
493	TC	475	Proceedings nutria and muskrat management symposium. Louisiana Cooperative Extension Service	Hebert		1992	English	Conference proceedings	In Baroch, J., Hafner, M., Brown, T. L., Mach, J., & Poché, M. R. (2002). Nutria (myocastor coypus) in Louisiana. (HW)	No	Animalia	Chordata	Mammalia	Rodentia	Myocastoridae	Myocastor	Myocastor coypus		Nutria	Semi-aquatic	semi-aquatic					North America	USA		Louisiana	Site	1991	Year	1991	Unspecified	1991	1991	Potentially ongoing	2000000			3.49381e+06	3.49381e+06	2000000	3.49381e+06	3.49381e+06	USD	1992	Publication year	Observed
495	TC	217	Coastal project list narrowed to 19. The Advocate. Baton Rouge, LA	Dunne		2001	English	Official report	Baroch, J., Hafner, M., Brown, T. L., Mach, J., & Poché, M. R. (2002). Nutria (myocastor coypus) in Louisiana. (HW)	No	Animalia	Chordata	Mammalia	Rodentia	Myocastoridae	Myocastor	Myocastor coypus		Nutria	Semi-aquatic	semi-aquatic					North America	USA		Louisiana	Site	Unspecified	Year	Unspecified	Unspecified	2001	2001	One-time	1600000			2.21494e+06	2.21494e+06	1600000	2.21494e+06	2.21494e+06	USD	2001	Publication year	Observed
496	TC	443	Nutria (myocastor coypus) in Louisiana	Baroch et al		2002	English	Official report	NA	Yes	Animalia	Chordata	Mammalia	Rodentia	Myocastoridae	Myocastor	Myocastor coypus		Nutria	Semi-aquatic	semi-aquatic					North America	USA		Unspecified	Country	6 days	Year	Unspecified	Unspecified	2002	2002	One-time	10466	1500	15947	14262.2	14262.2	10466	14262.2	14262.2	USD	2002	Publication year	Potential
497	TC	443	Nutria (myocastor coypus) in Louisiana	Baroch et al		2002	English	Official report	NA	Yes	Animalia	Chordata	Mammalia	Rodentia	Myocastoridae	Myocastor	Myocastor coypus		Nutria	Semi-aquatic	semi-aquatic					North America	USA		Louisiana	Site	Unspecified	Year	Unspecified	Unspecified	2002	2002	One-time	1100000	300000	500000	1.49899e+06	1.49899e+06	1100000	1.49899e+06	1.49899e+06	USD	2002	Publication year	Potential
498	TC	443	Nutria (myocastor coypus) in Louisiana	Baroch et al		2002	English	Official report	NA	Yes	Animalia	Chordata	Mammalia	Rodentia	Myocastoridae	Myocastor	Myocastor coypus		Nutria	Semi-aquatic	semi-aquatic					North America	USA		Louisiana	Site	2002	Year	2002	Unspecified	2002	2002	Potentially ongoing	6000000			8.17633e+06	8.17633e+06	6000000	8.17633e+06	8.17633e+06	USD	2002	Publication year	Potential
499	TC	443	Nutria (myocastor coypus) in Louisiana	Baroch et al		2002	English	Official report	NA	Yes	Animalia	Chordata	Mammalia	Rodentia	Myocastoridae	Myocastor	Myocastor coypus		Nutria	Semi-aquatic	semi-aquatic					North America	USA		Louisiana	Site	5 to 8 years	Period	1997	2002	1997	2002	One-time	7500000			1.02204e+07	1.02204e+07	1250000	1.7034e+06	1.7034e+06	USD	2002	Publication year	Potential
502	WoS	4190	Maximizing return on investment for island restoration and species conservation	Donlan et al		2015	English	Peer-reviewed article	NA	Yes	Animalia	Chordata	Mammalia	Carnivora/Rodentia	Muridae/Mustelidae/Procyonidae	Rattus/Neovison/Procyon	Rattus rattus/Neovison vison/Procyon lotor		Brown rat/Black rat/American mink/Raccoon	Terrestrial	diverse/Unspecified					North America	Canada		British Columbia/All islands under 15 000 ha	Site	Unspecified	Year	Unspecified	Unspecified	2015	2015	One-time	2673856			2.81346e+06	2.36706e+06	2673856	2.81346e+06	2.36706e+06	USD	2013	Effective	Potential
512	WoS	1295	Characterizing the Economic Value and Impacts of Wild Pig Damage on a Rural Economy	Poudyal et al		2017	English	Peer-reviewed article	NA	Yes	Animalia	Chordata	Mammalia	Artiodactyla	Suidae	Sus	Sus scrofa		Feral pig	Terrestrial	terrestrial					North America	USA		Tenessee	Site	2015	Year	2015	Unspecified	2015	2015	Potentially ongoing	32810000			3.39316e+07	3.39316e+07	32810000	3.39316e+07	3.39316e+07	USD	2015	Effective	Observed
513	WoS	1295	Characterizing the Economic Value and Impacts of Wild Pig Damage on a Rural Economy	Poudyal et al		2017	English	Peer-reviewed article	NA	Yes	Animalia	Chordata	Mammalia	Artiodactyla	Suidae	Sus	Sus scrofa		Feral pig	Terrestrial	terrestrial					North America	USA		Tenessee	Site	2015	Year	2015	Unspecified	2015	2015	Potentially ongoing	4600000			4.75725e+06	4.75725e+06	4600000	4.75725e+06	4.75725e+06	USD	2015	Effective	Observed
514	TC	269	Economic estimate of wild pig damage to farmland owners in Alabama. Proceedings of the 2010 international wild pig symposium, Pensacola, Florida	Shi et al		2010	English	Official report	Poudyal, N. C., Caplenor, C., Joshi, O., Maldonado, C., Muller, L. I., & Yoest, C. (2017). Characterizing the Economic Value and Impacts of Wild Pig Damage on a Rural Economy. Human Dimensions of Wildlife, 22(6), 538–549. https://doi.org/10.1080/10871209.2017.1368103	Yes	Animalia	Chordata	Mammalia	Artiodactyla	Suidae	Sus	Sus scrofa		Feral pig	Terrestrial	terrestrial					North America	USA		Alabama	Site	2009	Year	2009	Unspecified	2009	2009	Potentially ongoing	55000000			6.28403e+07	6.28403e+07	55000000	6.28403e+07	6.28403e+07	USD	2009	Effective	Observed
515	TC	153	2015 Georgia wild pig survey final report	Mengak		2016	English	Official report	Poudyal, N. C., Caplenor, C., Joshi, O., Maldonado, C., Muller, L. I., & Yoest, C. (2017). Characterizing the Economic Value and Impacts of Wild Pig Damage on a Rural Economy. Human Dimensions of Wildlife, 22(6), 538–549. https://doi.org/10.1080/10871209.2017.1368103	Yes	Animalia	Chordata	Mammalia	Artiodactyla	Suidae	Sus	Sus scrofa		Feral pig	Terrestrial	terrestrial					North America	USA		Georgia	Site	2014	Year	2014	Unspecified	2014	2014	Potentially ongoing	150610000			1.55943e+08	1.55943e+08	150610000	1.55943e+08	1.55943e+08	USD	2014	Effective	Observed
516	TC	425	Monetary estimates of wild hog damage to agricultural producers in Louisiana	Tanger et al		2015	English	Peer-reviewed article	Poudyal, N. C., Caplenor, C., Joshi, O., Maldonado, C., Muller, L. I., & Yoest, C. (2017). Characterizing the Economic Value and Impacts of Wild Pig Damage on a Rural Economy. Human Dimensions of Wildlife, 22(6), 538–549. https://doi.org/10.1080/10871209.2017.1368103	Yes	Animalia	Chordata	Mammalia	Artiodactyla	Suidae	Sus	Sus scrofa		Feral pig	Terrestrial	terrestrial					North America	USA		Louisiana	Site	2013	Year	2013	Unspecified	2013	2013	Potentially ongoing	74000000			7.78635e+07	7.78635e+07	74000000	7.78635e+07	7.78635e+07	USD	2013	Effective	Observed
517	TC	629	Wild hog population growth, density, and harvest in Texas	Texas A&M		2012	English	Web page	Poudyal, N. C., Caplenor, C., Joshi, O., Maldonado, C., Muller, L. I., & Yoest, C. (2017). Characterizing the Economic Value and Impacts of Wild Pig Damage on a Rural Economy. Human Dimensions of Wildlife, 22(6), 538–549. https://doi.org/10.1080/10871209.2017.1368103	No	Animalia	Chordata	Mammalia	Artiodactyla	Suidae	Sus	Sus scrofa		Feral pig	Terrestrial	terrestrial					North America	USA		Texas	Site	2010	Year	2010	Unspecified	2010	2010	Potentially ongoing	52000000			5.8454e+07	5.8454e+07	52000000	5.8454e+07	5.8454e+07	USD	2010	Effective	Observed
549	WoS	14428	Effectiveness of Rodent Control and Monitoring Techniques for a Montane Rainforest	Nelson et al		2002	English	Peer-reviewed article	NA	Yes	Animalia	Chordata	Mammalia	Rodentia	Muridae	Rattus	Rattus exulans/Rattus rattus		Polynesian rat/Black rat	Terrestrial	terrestrial				Y	Oceania/Pacific Islands	USA	Hawaii	Hawaii (Hakalau Forest)	Unit (Km²)	1999	Year	1999	Unspecified	1999	1999	Potentially ongoing	7000			10300.7	10300.7	7000	10300.7	10300.7	USD	1999	Effective	Observed
551	TC	388	Island conservation in north-west Mexico: a conservation model integrating research, education and exotic mammal eradication	Tershy et al		2002	English	Peer-reviewed article	Donlan, C. J., Tershy, B. R., Campbell, K., & Cruz, F. (2003). Research for requiems: the need for more collaborative action in invasive species management and conservation. Conservation Biology, 17(6), 1850–1851. https://doi.org/10.1111/j.1523-1739.2003.00012.x	Yes	Animalia	Chordata	Mammalia	Diverse/Unspecified	Diverse/Unspecified	Diverse/Unspecified	Diverse/Unspecified			Terrestrial	terrestrial	Y			Y	North America	Mexico		23 North-West Islands	Site	1994-2000	Period	1994	2000	1994	2000	One-time	750000			1.02204e+06	1.50584e+06	107143	146006	215119	USD	2002	Publication year	Observed
582	TC	385	Invasive species: Federal and selected state funding to address harmful nonnative species, GAO/RCED-00-219	General Accounting Office, US Congress		2000	English	Official report	Simberloff, D., Parker, I. M., & Windle, P. N. (2005). Introduced species policy, management, and future research needs. Frontiers in Ecology and the Environment, 3(1), 12–20. https://doi.org/10.1890/1540-9295(2005)003[0012:ispmaf]2.0.co;2	Yes	Animalia	Chordata	Mammalia	Diverse/Unspecified	Diverse/Unspecified	Diverse/Unspecified	Diverse/Unspecified		Mammals	Terrestrial	terrestrial					North America	USA		Unspecified	Country	1999	Year	1999	Unspecified	1999	1999	Potentially ongoing	800000			1.17722e+06	1.17722e+06	800000	1.17722e+06	1.17722e+06	USD	1999	Effective	Observed
599	Go	119	The Economic Impact of Invasive Species To Wildlife Services’ Cooperators	Bergman et al		2000	English	Conference proceedings	NA	Yes	Animalia	Chordata	Mammalia	Diverse/Unspecified	Diverse/Unspecified	Diverse/Unspecified	Diverse/Unspecified		Mammalian pests	Terrestrial	terrestrial					North America	USA		Unspecified	Country	1990-1997	Year	1990	1997	1990	1997	Potentially ongoing	1793814			2.55342e+06	2.55342e+06	1793814	2.55342e+06	2.55342e+06	USD	2000	Publication year	Observed
600	TC	514	Sheep and goat predator loss; Cattle predator loss	National Agricultural Statistics Service		1996	English	Official report	Bergman, D., Chandler, M., & Locklear, A. (2000). The Economic Impact of Invasive Species To Wildlife Services’ Cooperators. DigitalCommons@University of Nebraska - Lincoln, (August). Retrieved from http://digitalcommons.unl.edu/nwrchumanconflicts/21/	No	Animalia	Chordata	Mammalia	Carnivora	Canidae	Canis	Canis lupus		Dog	Terrestrial	terrestrial					North America	USA		Unspecified	Country	1995-1996	Year	1995	1996	1996	1996	Potentially ongoing	9752800			1.52413e+07	1.52413e+07	9752800	1.52413e+07	1.52413e+07	USD	1996	Publication year	Observed
601	GS	223	Plant, Animal, and Microbe Invasive Species in the United States and World	Pimentel et al		2007	English	Book chapter	NA	No	Animalia	Chordata	Mammalia	Rodentia	Muridae	Rattus	Rattus sp.		Rat	Terrestrial	terrestrial					North America	USA		Unspecified	Country	2007	Year	2007	Unspecified	2007	2007	Potentially ongoing	30000000000			36352557806	36352557806	30750000000	36352557806	36352557806	USD	2007	Publication year	Potential
606	TC	291	Environmental valuation and the Hawaiian economy	Kaiser et al		1999	English	Official report	IKUMA, E. K., SUGANO, D., & MARDFIN, J. K. (2002). Filling the Gaps in the Fight Against Invasive Species. Honolulu, Hawaii.	Yes	Animalia	Chordata	Mammalia	Rodentia	Muridae	Rattus	Rattus sp.		Rat	Terrestrial	terrestrial					Oceania/Pacific Islands	USA	Hawaii	Hawaii	Site	Early 1990s	Year	1990	Unspecified	1990	1990	Potentially ongoing	8000000	6000000	10000000	1.50083e+07	1.50083e+07	8000000	1.50083e+07	1.50083e+07	USD	1990	Effective	Observed
607	TC	291	Environmental valuation and the Hawaiian economy	Kaiser et al		1999	English	Official report	IKUMA, E. K., SUGANO, D., & MARDFIN, J. K. (2002). Filling the Gaps in the Fight Against Invasive Species. Honolulu, Hawaii.	Yes	Animalia	Chordata	Mammalia	Rodentia	Muridae	Rattus	Rattus sp.		Rat	Terrestrial	terrestrial					Oceania/Pacific Islands	USA	Hawaii	Hawaii	Site	1995	Year	1995	1995	1995	1995	Potentially ongoing	2700000	1800000	3600000	4.34314e+06	4.34314e+06	2700000	4.34314e+06	4.34314e+06	USD	1995	Effective	Observed
608	GS	86	Environmental and Economic Costs of Nonindigenous Species in the United States	Pimentel et al		2000	English	Peer-reviewed article	NA	Yes	Animalia	Chordata	Mammalia	Carnivora	Herpestidae	Herpestes	Herpestes edwardsi		Indian mongoose	Terrestrial	terrestrial					Central America/Oceania/Pacific islands	USA		Puerto Rico/Hawaii	Intercontinental	2000	Year	2000	Unspecified	2000	2000	Potentially ongoing	50000000			7.11729e+07		50000000	7.11729e+07		USD	2000	Publication year	Observed
609	GS	86	Environmental and Economic Costs of Nonindigenous Species in the United States	Pimentel et al		2000	English	Peer-reviewed article	NA	Yes	Animalia	Chordata	Mammalia	Carnivora	Felidae	Felis	Felis catus		Feral Cat	Terrestrial	terrestrial					North America	USA		Unspecified	Country	2000	Year	2000	Unspecified	2000	2000	Potentially ongoing	14000000000			19928421409	19928421409	14000000000	19928421409	19928421409	USD	2000	Publication year	Observed
610	TC	187	Animal damage control annual report	Animal damage control service		1989	English	Official report	Pimentel, D., Lach, L., Zuniga, R., & Morrison, D. (2000). Environmental and Economic Costs of Nonindigenous Species in the United States. BioScience, 50(9), 783–792. https://doi.org/10.1641/0006-3568(2000)050 --> Carter, C. N. (1990). Pet population control: another decade without solutions? Journal of the American Veterinary Medical Association, 197(2), 192–195	No	Animalia	Chordata	Mammalia	Carnivora	Canidae	Canis	Canis lupus		Dog	Terrestrial	terrestrial					North America	USA		Texas	Site	Unspecified	Year	Unspecified	Unspecified	1989	1989	Potentially ongoing	5000000			9.88651e+06	9.88651e+06	5000000	9.88651e+06	9.88651e+06	USD	1989	Publication year	Observed
611	TC	474	Problems related to animal control	Flowers		1979	English	Peer-reviewed article	Carter, C. N. (1990). Pet population control: another decade without solutions? Journal of the American Veterinary Medical Association, 197(2), 192–195.	Yes	Animalia	Chordata	Mammalia	Carnivora	Canidae	Canis	Canis lupus		Dog	Terrestrial	terrestrial					North America	USA		Unspecified	Country	Unspecified	Year	Unspecified	Unspecified	1979	1979	Potentially ongoing	180000000	90000000	270000000	6.07944e+08	6.07944e+08	180000000	6.07944e+08	6.07944e+08	USD	1979	Publication year	Observed
612	TC	474	Problems related to animal control	Flowers		1979	English	Peer-reviewed article	Carter, C. N. (1990). Pet population control: another decade without solutions? Journal of the American Veterinary Medical Association, 197(2), 192–195.	Yes	Animalia	Chordata	Mammalia	Carnivora	Canidae	Canis	Canis lupus		Dog	Terrestrial	terrestrial					North America	USA		Unspecified	Country	Unspecified	Year	Unspecified	Unspecified	1979	1979	Potentially ongoing	500000000			1688732920	1688732920	500000000	1688732920	1688732920	USD	1979	Publication year	Observed
613	GS	86	Environmental and Economic Costs of Nonindigenous Species in the United States	Pimentel et al		2000	English	Peer-reviewed article	NA	Yes	Animalia	Chordata	Mammalia	Carnivora	Canidae	Canis	Canis lupus		Dog	Terrestrial	terrestrial					North America	USA		Unspecified	Country	2000	Year	2000	Unspecified	2000	2000	Potentially ongoing	10000000			1.42346e+07	1.42346e+07	10000000	1.42346e+07	1.42346e+07	USD	2000	Publication year	Observed
614	GS	86	Environmental and Economic Costs of Nonindigenous Species in the United States	Pimentel et al		2000	English	Peer-reviewed article	NA	Yes	Animalia	Chordata	Mammalia	Carnivora	Canidae	Canis	Canis lupus		Dog	Terrestrial	terrestrial					North America	USA		Unspecified	Country	Unspecified	Year	Unspecified	Unspecified	2000	2000	Potentially ongoing	250000000			3.46084e+08	3.46084e+08	250000000	3.46084e+08	3.46084e+08	USD	2001	Publication year	Observed
615	GS	86	Environmental and Economic Costs of Nonindigenous Species in the United States	Pimentel et al		2000	English	Peer-reviewed article	NA	Yes	Animalia	Chordata	Mammalia	Artiodactyla	Suidae	Sus	Sus scrofa		Feral pig	Terrestrial	terrestrial					Oceania/Pacific Islands	USA	Hawaii	Hawaii	Unit (Park)	1999	Year	1999	Unspecified	1999	1999	Potentially ongoing	450000			640556	640556	450000	640556	640556	USD	2000	Publication year	Observed
616	GS	86	Environmental and Economic Costs of Nonindigenous Species in the United States	Pimentel et al		2000	English	Peer-reviewed article	NA	Yes	Animalia	Chordata	Mammalia	Artiodactyla	Suidae	Sus	Sus scrofa		Feral pig	Terrestrial	terrestrial					North America	USA		Unspecified	Country	2000	Year	2000	Unspecified	2000	2000	Potentially ongoing	800000000			1138766938	1138766938	800000000	1138766938	1138766938	USD	2000	Publication year	Observed
632	TC	291	Environmental valuation and the Hawaiian economy	Kaiser et al		1999	English	Official report	NA	Yes	Animalia	Chordata	Mammalia	Artiodactyla	Suidae	Sus	Sus scrofa		Feral pig	Terrestrial	terrestrial					Oceania/Pacific Islands	USA	Hawaii	Hawaii (Maui, Haleakalä National Park)	Unit (Park)	1991	Year	1991	1991	1991	1991	One-time	2400000			3.53166e+06	3.53166e+06	2400000	3.53166e+06	3.53166e+06	USD	1999	Publication year	Observed
633	TC	291	Environmental valuation and the Hawaiian economy	Kaiser et al		1999	English	Official report	NA	Yes	Animalia	Chordata	Mammalia	Artiodactyla	Suidae	Sus	Sus scrofa		Feral pig	Terrestrial	terrestrial					Oceania/Pacific Islands	USA	Hawaii	Hawaii (Külani Prison)	Site	Unspecified	Year	Unspecified	Unspecified	1999	1999	One-time	43000	36000	50000	63275.7	63275.7	43000	63275.7	63275.7	USD	1999	Publication year	Observed
634	TC	291	Environmental valuation and the Hawaiian economy	Kaiser et al		1999	English	Official report	NA	Yes	Animalia	Chordata	Mammalia	Artiodactyla	Suidae	Sus	Sus scrofa		Feral pig	Terrestrial	terrestrial					Oceania/Pacific Islands	USA	Hawaii	Hawaii (Pöhakuloa Training Area)	Site	Unspecified	Year	Unspecified	Unspecified	1999	1999	One-time	276000			406141	406141	276000	406141	406141	USD	1999	Publication year	Observed
635	TC	291	Environmental valuation and the Hawaiian economy	Kaiser et al		1999	English	Official report	NA	Yes	Animalia	Chordata	Mammalia	Artiodactyla	Suidae	Sus	Sus scrofa		Feral pig	Terrestrial	terrestrial					Oceania/Pacific Islands	USA	Hawaii	Hawaii (Pälalai Gulch/O‘ahu)	Site	Unspecified	Year	Unspecified	Unspecified	1999	1999	One-time	75000			110365	110365	75000	110365	110365	USD	1999	Publication year	Observed
636	TC	291	Environmental valuation and the Hawaiian economy	Kaiser et al		1999	English	Official report	NA	Yes	Animalia	Chordata	Mammalia	Artiodactyla	Suidae	Sus	Sus scrofa		Feral pig	Terrestrial	terrestrial					Oceania/Pacific Islands	USA	Hawaii	Hawaii (All conservation districts)	Site	1999	Year	1999	Unspecified	1999	1999	Potentially ongoing	28875000			4.24903e+07	4.24903e+07	28875000	4.24903e+07	4.24903e+07	USD	1999	Publication year	Potential
637	TC	233	Current Federal Aid Research Report: Wildlife 1990	U.S. Department of the Interior, Fish and Wildlife Service		1990	English	Official report	OTA. (1993). Harmful Non-Indigenous Species in the United States. Ota-F-565, (September). Retrieved from https://www.anstaskforce.gov/Documents/OTA_Report_1993.pdf	No	Animalia	Chordata	Mammalia	Artiodactyla/Carnivora	Canidae/Suidae	Canis/Sus	Canis lupus/Sus scrofa		Feral Dog/Feral Pig	Terrestrial	terrestrial					North America	USA		Unspecified	Country	1989-1990	Year	1989	1990	1990	1990	One-time	24671			46283.7	46283.7	24671	46283.7	46283.7	USD	1990	Effective	Observed
638	TC	346	Harmful Non-Indigenous Species in the United States	U.S. Congress, Office of Technology Assessment		1993	English	Official report	NA	Yes	Animalia	Chordata	Mammalia	Diverse/Unspecified	Diverse/Unspecified	Diverse/Unspecified	Diverse/Unspecified		Feral ungulates	Terrestrial	terrestrial					Oceania/Pacific Islands	USA	Hawaii	Hawaii (Maui, Haleakalä National Park)	Unit (Park)	1992	Year	1992	1992	1992	1992	One-time	2400000			4.07236e+06	4.07236e+06	2400000	4.07236e+06	4.07236e+06	USD	1993	Publication year	Observed
639	TC	346	Harmful Non-Indigenous Species in the United States	U.S. Congress, Office of Technology Assessment		1993	English	Official report	NA	Yes	Animalia	Chordata	Mammalia	Diverse/Unspecified	Diverse/Unspecified	Diverse/Unspecified	Diverse/Unspecified		Feral ungulates	Terrestrial	terrestrial					Oceania/Pacific Islands	USA	Hawaii	Hawaii (Maui, Haleakalä National Park)	Unit (Park)	1992	Year	1992	Unspecified	1992	1992	Potentially ongoing	130000			220586	220586	130000	220586	220586	USD	1993	Publication year	Observed
640	TC	346	Harmful Non-Indigenous Species in the United States	﻿Office of Technology Assessment		1993	English	Official report	Krcmar-Nozic, E., Wilson, B., & Arthur, L. (2000). The potential impacts of exotic forest pests in North America: a synthesis of research. Information Report BC-X-387.	Yes	Animalia	Chordata	Mammalia	Rodentia	Muridae	Rattus	Rattus sp.		Rat	Terrestrial	terrestrial					Oceania/Pacific Islands	USA	Hawaii	Hawaii	Site	1986-1987	Year	1986	1987	1987	1987	One-time	52200			112609	112609	52200	112609	112609	USD	1987	Effective	Observed
641	TC	346	Harmful Non-Indigenous Species in the United States	﻿Office of Technology Assessment		1993	English	Official report	Krcmar-Nozic, E., Wilson, B., & Arthur, L. (2000). The potential impacts of exotic forest pests in North America: a synthesis of research. Information Report BC-X-387.	Yes	Animalia	Chordata	Mammalia	Rodentia	Muridae	Rattus	Rattus sp.		Rat	Terrestrial	terrestrial					Oceania/Pacific Islands	USA	Hawaii	Hawaii	Site	1988-1989	Year	1988	1989	1989	1989	One-time	140500			277811	277811	140500	277811	277811	USD	1989	Effective	Observed
642	TC	346	Harmful Non-Indigenous Species in the United States	﻿Office of Technology Assessment		1993	English	Official report	Krcmar-Nozic, E., Wilson, B., & Arthur, L. (2000). The potential impacts of exotic forest pests in North America: a synthesis of research. Information Report BC-X-387.	Yes	Animalia	Chordata	Mammalia	Rodentia	Muridae	Rattus	Rattus sp.		Rat	Terrestrial	terrestrial					Oceania/Pacific Islands	USA	Hawaii	Hawaii	Site	1991-1992	Year	1991	1992	1992	1992	One-time	116250			203077	203077	116250	203077	203077	USD	1992	Effective	Observed
643	TC	346	Harmful Non-Indigenous Species in the United States	U.S. Congress, Office of Technology Assessment		1993	English	Official report	NA	Yes	Animalia	Chordata	Mammalia	Lagomorpha	Leporidae	Oryctolagus	Oryctolagus cuniculus		European (common) rabbit	Terrestrial	terrestrial					Oceania/Pacific Islands	USA	Hawaii	Hawaii (Maui, Haleakalä National Park)	Unit (Park)	1989-1991	Period	1989	1991	1989	1991	One-time	15000			28140.5	28140.5	5000	9380.17	9380.17	USD	1990	Effective	Observed
698	Go	90	The Actual and Potential Economic Impact of Invasive Species on the Adirondack Park : A Preliminary Assessment	Yellow Wood Associates Inc.		2014	English	Official report	NA	Yes	Animalia	Chordata	Mammalia	Artiodactyla	Suidae	Sus	Sus scrofa		Feral pig	Terrestrial	terrestrial				Y	North America	USA		New York (Department of Environmental Conservation, region 5)	Site	2011-2013	Period	2011	2013	2011	2013	One-time	79497			84872.8	84872.8	26499	28290.9	28290.9	USD	2012	Effective	Observed
699	Go	90	The Actual and Potential Economic Impact of Invasive Species on the Adirondack Park : A Preliminary Assessment	Yellow Wood Associates Inc.		2014	English	Official report	NA	Yes	Animalia	Chordata	Mammalia	Artiodactyla	Suidae	Sus	Sus scrofa		Feral pig	Terrestrial	terrestrial				Y	North America	USA		New York (Department of Environmental Conservation, region 5)	Site	2011-2012	Year	2011	2012	2012	2012	Potentially ongoing	10000			10676.2	10676.2	10000	10676.2	10676.2	USD	2012	Effective	Observed
700	Go	90	The Actual and Potential Economic Impact of Invasive Species on the Adirondack Park : A Preliminary Assessment	Yellow Wood Associates Inc.		2014	English	Official report	NA	Yes	Animalia	Chordata	Mammalia	Artiodactyla	Suidae	Sus	Sus scrofa		Feral pig	Terrestrial	terrestrial				Y	North America	USA		New York (Department of Environmental Conservation, region 5)	Site	2011-2013	Period	2011	2013	2011	2013	One-time	23100			24662.1	24662.1	7700	8220.69	8220.69	USD	2012	Effective	Observed
724	GS	305	Impacts of Introduced Species in the United States	Simberloff		1996	English	Peer-reviewed article	NA	Yes	Animalia	Mollusca	Gastropoda	Stylommatophora	Achatinidae	Lissachatina	Achatina fulica		Giant african snail	Terrestrial	terrestrial					North America	USA		Florida	Site	10 years	Period	1986	1996	1986	1996	One-time	1000000			1.56276e+06	1.56276e+06	100000	156276	156276	USD	1996	Publication year	Observed
734	TC	6	Hawaii’s coqui frog management, research and education plan	Anonymous		2010	English	Official report	Olson, C. A., Beard, K. H., & Pitt, W. C. (2012). Biology and Impacts of Pacific Island Invasive Species. 8. Eleutherodactylus Planirostris, the Greenhouse Frog (Anura: Eleutherodactylidae). Pacific Science, 66(3), 255–270. https://doi.org/10.2984/66.3.1	Yes	Animalia	Chordata	Amphibia	Anura	Eleutherodactylidae	Eleutherodactylus	Eleutherodactylus coqui		Coqui frog	Terrestrial	terrestrial					Oceania/Pacific Islands	USA	Hawaii	Hawaii	Site	2006-2007	Year	2006	2007	2007	2007	One-time	520000			614742	614742	520000	614742	614742	USD	2007	Effective	Observed
735	TC	6	Hawaii’s coqui frog management, research and education plan	Anonymous		2010	English	Official report	Olson, C. A., Beard, K. H., & Pitt, W. C. (2012). Biology and Impacts of Pacific Island Invasive Species. 8. Eleutherodactylus Planirostris, the Greenhouse Frog (Anura: Eleutherodactylidae). Pacific Science, 66(3), 255–270. https://doi.org/10.2984/66.3.1	Yes	Animalia	Chordata	Amphibia	Anura	Eleutherodactylidae	Eleutherodactylus	Eleutherodactylus coqui		Coqui frog	Terrestrial	terrestrial					Oceania/Pacific Islands	USA	Hawaii	Hawaii	Site	2006-2007	Year	2006	2007	2007	2007	One-time	2825000			3.33971e+06	3.33971e+06	2825000	3.33971e+06	3.33971e+06	USD	2007	Effective	Observed
736	TC	6	Hawaii’s coqui frog management, research and education plan	Anonymous		2010	English	Official report	Olson, C. A., Beard, K. H., & Pitt, W. C. (2012). Biology and Impacts of Pacific Island Invasive Species. 8. Eleutherodactylus Planirostris, the Greenhouse Frog (Anura: Eleutherodactylidae). Pacific Science, 66(3), 255–270. https://doi.org/10.2984/66.3.1	Yes	Animalia	Chordata	Amphibia	Anura	Eleutherodactylidae	Eleutherodactylus	Eleutherodactylus coqui		Coqui frog	Terrestrial	terrestrial					Oceania/Pacific Islands	USA	Hawaii	Hawaii	Site	2006-2007	Year	2006	2007	2007	2007	One-time	321500			380076	380076	321500	380076	380076	USD	2007	Effective	Observed
737	TC	6	Hawaii’s coqui frog management, research and education plan	Anonymous		2010	English	Official report	Olson, C. A., Beard, K. H., & Pitt, W. C. (2012). Biology and Impacts of Pacific Island Invasive Species. 8. Eleutherodactylus Planirostris, the Greenhouse Frog (Anura: Eleutherodactylidae). Pacific Science, 66(3), 255–270. https://doi.org/10.2984/66.3.1	Yes	Animalia	Chordata	Amphibia	Anura	Eleutherodactylidae	Eleutherodactylus	Eleutherodactylus coqui		Coqui frog	Terrestrial	terrestrial					Oceania/Pacific Islands	USA	Hawaii	Hawaii	Site	2006-2007	Year	2006	2007	2007	2007	One-time	116000			137135	137135	116000	137135	137135	USD	2007	Effective	Observed
738	TC	6	Hawaii’s coqui frog management, research and education plan	Anonymous		2010	English	Official report	Olson, C. A., Beard, K. H., & Pitt, W. C. (2012). Biology and Impacts of Pacific Island Invasive Species. 8. Eleutherodactylus Planirostris, the Greenhouse Frog (Anura: Eleutherodactylidae). Pacific Science, 66(3), 255–270. https://doi.org/10.2984/66.3.1	Yes	Animalia	Chordata	Amphibia	Anura	Eleutherodactylidae	Eleutherodactylus	Eleutherodactylus coqui		Coqui frog	Terrestrial	terrestrial					Oceania/Pacific Islands	USA	Hawaii	Hawaii	Site	2006-2007	Year	2006	2007	2007	2007	One-time	466000			550904	550904	466000	550904	550904	USD	2007	Effective	Observed
739	TC	6	Hawaii’s coqui frog management, research and education plan	Anonymous		2010	English	Official report	Olson, C. A., Beard, K. H., & Pitt, W. C. (2012). Biology and Impacts of Pacific Island Invasive Species. 8. Eleutherodactylus Planirostris, the Greenhouse Frog (Anura: Eleutherodactylidae). Pacific Science, 66(3), 255–270. https://doi.org/10.2984/66.3.1	Yes	Animalia	Chordata	Amphibia	Anura	Eleutherodactylidae	Eleutherodactylus	Eleutherodactylus coqui		Coqui frog	Terrestrial	terrestrial					Oceania/Pacific Islands	USA	Hawaii	Hawaii	Site	2007-2009	Year	2007	2009	2007	2009	One-time	122008			137151	137151	122008	137151	137151	USD	2010	Publication year	Potential
740	TC	6	Hawaii’s coqui frog management, research and education plan	Anonymous		2010	English	Official report	Olson, C. A., Beard, K. H., & Pitt, W. C. (2012). Biology and Impacts of Pacific Island Invasive Species. 8. Eleutherodactylus Planirostris, the Greenhouse Frog (Anura: Eleutherodactylidae). Pacific Science, 66(3), 255–270. https://doi.org/10.2984/66.3.1	Yes	Animalia	Chordata	Amphibia	Anura	Eleutherodactylidae	Eleutherodactylus	Eleutherodactylus coqui		Coqui frog	Terrestrial	terrestrial					Oceania/Pacific Islands	USA	Hawaii	Hawaii	Site	2007-2009	Year	2007	2009	2007	2009	One-time	4500000	3000000	6000000	5.05852e+06	5.05852e+06	4500000	5.05852e+06	5.05852e+06	USD	2010	Publication year	Potential
741	TC	6	Hawaii’s coqui frog management, research and education plan	Anonymous		2010	English	Official report	Olson, C. A., Beard, K. H., & Pitt, W. C. (2012). Biology and Impacts of Pacific Island Invasive Species. 8. Eleutherodactylus Planirostris, the Greenhouse Frog (Anura: Eleutherodactylidae). Pacific Science, 66(3), 255–270. https://doi.org/10.2984/66.3.1	Yes	Animalia	Chordata	Amphibia	Anura	Eleutherodactylidae	Eleutherodactylus	Eleutherodactylus coqui		Coqui frog	Terrestrial	terrestrial					Oceania/Pacific Islands	USA	Hawaii	Hawaii	Site	2007-2009	Year	2007	2009	2007	2009	One-time	200000			224823	224823	200000	224823	224823	USD	2010	Publication year	Potential
742	TC	6	Hawaii’s coqui frog management, research and education plan	Anonymous		2010	English	Official report	Olson, C. A., Beard, K. H., & Pitt, W. C. (2012). Biology and Impacts of Pacific Island Invasive Species. 8. Eleutherodactylus Planirostris, the Greenhouse Frog (Anura: Eleutherodactylidae). Pacific Science, 66(3), 255–270. https://doi.org/10.2984/66.3.1	Yes	Animalia	Chordata	Amphibia	Anura	Eleutherodactylidae	Eleutherodactylus	Eleutherodactylus coqui		Coqui frog	Terrestrial	terrestrial					Oceania/Pacific Islands	USA	Hawaii	Hawaii	Site	Unspecified	Year	Unspecified	Unspecified	2010	2010	One-time	96000000			107915095	107915095	96000000	107915095	107915095	USD	2010	Publication year	Potential
743	TC	6	Hawaii’s coqui frog management, research and education plan	Anonymous		2010	English	Official report	Olson, C. A., Beard, K. H., & Pitt, W. C. (2012). Biology and Impacts of Pacific Island Invasive Species. 8. Eleutherodactylus Planirostris, the Greenhouse Frog (Anura: Eleutherodactylidae). Pacific Science, 66(3), 255–270. https://doi.org/10.2984/66.3.1	Yes	Animalia	Chordata	Amphibia	Anura	Eleutherodactylidae	Eleutherodactylus	Eleutherodactylus coqui		Coqui frog	Terrestrial	terrestrial					Oceania/Pacific Islands	USA	Hawaii	Hawaii	Site	2007-2010	Year	2007	2010	2007	2010	One-time	120000			134894	134894	120000	134894	134894	USD	2010	Publication year	Potential
744	TC	6	Hawaii’s coqui frog management, research and education plan	Anonymous		2010	English	Official report	Olson, C. A., Beard, K. H., & Pitt, W. C. (2012). Biology and Impacts of Pacific Island Invasive Species. 8. Eleutherodactylus Planirostris, the Greenhouse Frog (Anura: Eleutherodactylidae). Pacific Science, 66(3), 255–270. https://doi.org/10.2984/66.3.1	Yes	Animalia	Chordata	Amphibia	Anura	Eleutherodactylidae	Eleutherodactylus	Eleutherodactylus coqui		Coqui frog	Terrestrial	terrestrial					Oceania/Pacific Islands	USA	Hawaii	Hawaii	Site	2007-2010	Year	2007	2010	2007	2010	One-time	50000			56205.8	56205.8	50000	56205.8	56205.8	USD	2010	Publication year	Potential
745	TC	6	Hawaii’s coqui frog management, research and education plan	Anonymous		2010	English	Official report	Olson, C. A., Beard, K. H., & Pitt, W. C. (2012). Biology and Impacts of Pacific Island Invasive Species. 8. Eleutherodactylus Planirostris, the Greenhouse Frog (Anura: Eleutherodactylidae). Pacific Science, 66(3), 255–270. https://doi.org/10.2984/66.3.1	Yes	Animalia	Chordata	Amphibia	Anura	Eleutherodactylidae	Eleutherodactylus	Eleutherodactylus coqui		Coqui frog	Terrestrial	terrestrial					Oceania/Pacific Islands	USA	Hawaii	Hawaii	Site	2009-2013	Year	2009	2013	2009	2013	One-time	675000			758778	758778	675000	758778	758778	USD	2010	Publication year	Potential
746	TC	6	Hawaii’s coqui frog management, research and education plan	Anonymous		2010	English	Official report	Olson, C. A., Beard, K. H., & Pitt, W. C. (2012). Biology and Impacts of Pacific Island Invasive Species. 8. Eleutherodactylus Planirostris, the Greenhouse Frog (Anura: Eleutherodactylidae). Pacific Science, 66(3), 255–270. https://doi.org/10.2984/66.3.1	Yes	Animalia	Chordata	Amphibia	Anura	Eleutherodactylidae	Eleutherodactylus	Eleutherodactylus coqui		Coqui frog	Terrestrial	terrestrial					Oceania/Pacific Islands	USA	Hawaii	Hawaii	Site	2009-2013	Year	2009	2013	2009	2013	One-time	750000			843087	843087	750000	843087	843087	USD	2010	Publication year	Potential
748	TC	7	Economic Impacts of E. Coqui frogs in Hawaii	Kaiser et al		2006	English	Conference proceedings	NA	Yes	Animalia	Chordata	Amphibia	Anura	Eleutherodactylidae	Eleutherodactylus	Eleutherodactylus coqui		Coqui frog	Terrestrial	terrestrial					Oceania/Pacific Islands	USA	Hawaii	Hawaii	Site	Unspecified	Year	Unspecified	Unspecified	2006	2006	Potentially ongoing	1800000			2.18866e+06	2.18866e+06	1800000	2.18866e+06	2.18866e+06	USD	2006	Publication year	Potential
749	TC	7	Economic Impacts of E. Coqui frogs in Hawaii	Kaiser et al		2006	English	Conference proceedings	NA	Yes	Animalia	Chordata	Amphibia	Anura	Eleutherodactylidae	Eleutherodactylus	Eleutherodactylus coqui		Coqui frog	Terrestrial	terrestrial					Oceania/Pacific Islands	USA	Hawaii	Hawaii	Site	Unspecified	Year	Unspecified	Unspecified	2006	2006	Potentially ongoing	7600000			1.32765e+07	1.32765e+07	7600000	1.32765e+07	1.32765e+07	USD	1992	Effective	Observed
750	TC	7	Economic Impacts of E. Coqui frogs in Hawaii	Kaiser et al		2006	English	Conference proceedings	NA	Yes	Animalia	Chordata	Amphibia	Anura	Eleutherodactylidae	Eleutherodactylus	Eleutherodactylus coqui		Coqui frog	Terrestrial	terrestrial					Oceania/Pacific Islands	USA	Hawaii	Hawaii	Site	1992	Year	1992	Unspecified	1992	1992	Potentially ongoing	81000			141499	141499	81000	141499	141499	USD	1992	Effective	Potential
754	WoS	8509	The value of nonindigenous species risk assessment in international trade	Springborn et al		2011	English	Peer-reviewed article	NA	Yes	Animalia	Chordata	Amphibia/Reptilia	Diverse/Unspecified	Diverse/Unspecified	Diverse/Unspecified	Diverse/Unspecified		Diverse (amphibians/reptiles)	Terrestrial	terrestrial					North America	USA		Unspecified	Unit (Species)	Unspecified	Year	Unspecified	Unspecified	2011	2011	Potentially ongoing	97.5			111	111	97.5	111	111	USD	2008	Effective	Potential
755	WoS	8934	Reducing the Risk of Biological Invasion by Creating Incentives for Pet Sellers and Owners to Do the Right Thing	Perry and Farmer		2011	English	Peer-reviewed article	NA	Yes	Animalia	Chordata	Amphibia/Reptilia	Diverse/Unspecified	Diverse/Unspecified	Diverse/Unspecified	Diverse/Unspecified			Terrestrial	terrestrial					North America	USA		Unspecified	Country	2011	Year	2011	Unspecified	2011	2011	Potentially ongoing	300000000			3.26914e+08	3.26914e+08	300000000	3.26914e+08	3.26914e+08	USD	2011	Publication year	Potential
756	WoS	8014	Species Invasion as Catastrophe: The Case of the Brown Tree Snake	Burnett et al		2012	English	Peer-reviewed article	NA	Yes	Animalia	Chordata	Reptilia	Squamata	Colubridae	Boiga	Boiga irregularis		Brown tree snake	Terrestrial	terrestrial					Oceania/Pacific Islands	USA	Hawaii	Hawaii	Site	2012	Year	2012	Unspecified	2012	2012	Potentially ongoing	2600000			2.77582e+06	2.77582e+06	2600000	2.77582e+06	2.77582e+06	USD	2012	Publication year	Observed
757	WoS	8014	Species Invasion as Catastrophe: The Case of the Brown Tree Snake	Burnett et al		2012	English	Peer-reviewed article	NA	Yes	Animalia	Chordata	Reptilia	Squamata	Colubridae	Boiga	Boiga irregularis		Brown tree snake	Terrestrial	terrestrial					Oceania/Pacific Islands	USA	Hawaii	Hawaii	Site	2012	Year	2012	Unspecified	2012	2012	Potentially ongoing	2960000	2940000	3200000	3.16016e+06	3.16016e+06	2960000	3.16016e+06	3.16016e+06	USD	2012	Publication year	Potential
758	WoS	8014	Species Invasion as Catastrophe: The Case of the Brown Tree Snake	Burnett et al		2012	English	Peer-reviewed article	NA	Yes	Animalia	Chordata	Reptilia	Squamata	Colubridae	Boiga	Boiga irregularis		Brown tree snake	Terrestrial	terrestrial					Oceania/Pacific Islands	USA	Hawaii	Hawaii	Site	2012	Year	2012	Unspecified	2012	2012	Potentially ongoing	2940000			3.13881e+06	3.13881e+06	2940000	3.13881e+06	3.13881e+06	USD	2012	Publication year	Potential
759	WoS	8014	Species Invasion as Catastrophe: The Case of the Brown Tree Snake	Burnett et al		2012	English	Peer-reviewed article	NA	Yes	Animalia	Chordata	Reptilia	Squamata	Colubridae	Boiga	Boiga irregularis		Brown tree snake	Terrestrial	terrestrial					Oceania/Pacific Islands	USA	Hawaii	Hawaii	Site	2012	Year	2012	Unspecified	2012	2012	Potentially ongoing	3200000			3.41639e+06	3.41639e+06	3200000	3.41639e+06	3.41639e+06	USD	2012	Publication year	Potential
760	WoS	8014	Species Invasion as Catastrophe: The Case of the Brown Tree Snake	Burnett et al		2012	English	Peer-reviewed article	NA	Yes	Animalia	Chordata	Reptilia	Squamata	Colubridae	Boiga	Boiga irregularis		Brown tree snake	Terrestrial	terrestrial					Oceania/Pacific Islands	USA	Hawaii	Hawaii	Site	2012	Year	2012	Unspecified	2012	2012	Potentially ongoing	1600000			1.7082e+06	1.7082e+06	1600000	1.7082e+06	1.7082e+06	USD	2012	Publication year	Potential
761	WoS	8014	Species Invasion as Catastrophe: The Case of the Brown Tree Snake	Burnett et al		2012	English	Peer-reviewed article	NA	Yes	Animalia	Chordata	Reptilia	Squamata	Colubridae	Boiga	Boiga irregularis		Brown tree snake	Terrestrial	terrestrial					Oceania/Pacific Islands	USA	Hawaii	Hawaii	Site	2012	Year	2012	Unspecified	2012	2012	Potentially ongoing	239000000			2.55162e+08	2.55162e+08	239000000	2.55162e+08	2.55162e+08	USD	2012	Publication year	Potential
762	WoS	11219	Beyond the lamppost: Optimal prevention and control of the Brown Tree Snake in Hawaii	Burnett et al		2008	English	Peer-reviewed article	NA	Yes	Animalia	Chordata	Reptilia	Squamata	Colubridae	Boiga	Boiga irregularis		Brown tree snake	Terrestrial	terrestrial					Oceania/Pacific Islands	USA	Hawaii	Hawaii (Oahu)	Site	Unspecified	Year	Unspecified	Unspecified	2008	2008	One-time	74000000			8.42482e+07	8.42482e+07	74000000	8.42482e+07	8.42482e+07	USD	2008	Publication year	Potential
763	WoS	1908	Betrayal: radio-tagged Burmese pythons reveal locations of conspecifics in Everglades National Park	Smith et al		2016	English	Peer-reviewed article	NA	Yes	Animalia	Chordata	Reptilia	Squamata	Pythonidae	Python	Python bivittatus		Burmese python	Terrestrial	semi-aquatic					North America	USA		Everglades national park	Unit (Park)	Breeding seasons (2007-2011)	Period	2007	2011	2007	2011	One-time	154400			157689	157689	30880	31537.8	31537.8	USD	2016	Publication year	Observed
764	GS	288	Today Tiritiri Matangi, tomorrow the world! Are we aiming too low in invasives control?	Simberloff		2002	English	Conference proceedings	NA	No	Animalia	Chordata	Reptilia	Squamata	Colubridae	Boiga	Boiga irregularis		Brown tree snake	Terrestrial	terrestrial					Oceania/Pacific Islands	USA		Guam	Site	2002	Year	2002	Unspecified	2002	2002	Potentially ongoing	4600000			6.26852e+06	6.26852e+06	4600000	6.26852e+06	6.26852e+06	USD	2002	Publication year	Observed
765	WoS	583	Expert Elicitation, Uncertainty, and the Value of Information in Controlling Invasive Species	Johnson et al		2017	English	Peer-reviewed article	NA	Yes	Animalia	Chordata	Reptilia	Squamata	Teiidae	Salvator	Salvator merianae		Tegu lizard	Terrestrial	terrestrial					North America	USA		Southern Florida	Site	2017	Year	2017	Unspecified	2017	2017	Potentially ongoing	8641			8641	8641	8641	8641	8641	USD	2017	Publication year	Potential
766	WoS	2831	Development of artificial bait for brown treesnake suppression	Kimball et al		2016	English	Peer-reviewed article	NA	Yes	Animalia	Chordata	Reptilia	Squamata	Colubridae	Boiga	Boiga irregularis		Brown tree snake	Terrestrial	terrestrial					Oceania/Pacific Islands	USA		Guam	Unit (Bait)	Unspecified	Year	Unspecified	Unspecified	2016	2016	One-time	0.1			0.14	0.14	0.14	0.14	0.14	USD	2016	Publication year	Observed
767	WoS	2831	Development of artificial bait for brown treesnake suppression	Kimball et al		2016	English	Peer-reviewed article	NA	Yes	Animalia	Chordata	Reptilia	Squamata	Colubridae	Boiga	Boiga irregularis		Brown tree snake	Terrestrial	terrestrial					Oceania/Pacific Islands	USA		Guam	Unit (Bait)	Unspecified	Year	Unspecified	Unspecified	2016	2016	One-time	0.5	0.45	0.6	0.54	0.54	0.53	0.54	0.54	USD	2016	Publication year	Observed
768	TC	454	Optimal public control of exotic species: Preventing the Brown Tree Snake (Boiga irregularis) from invading Hawaii	Burnett et al		2004	English	Conference communication	Rodda, G. H., & Savidge, J. a. (2007). Biology and Impacts of Pacific Island Invasive Species. 2. Boiga irregularis, the Brown Tree Snake (Reptilia: Colubridae). Pacific Science, 61(3), 307–324. https://doi.org/10.2984/1534-6188(2007)61[307:BAIOPI]2.0.CO;2	No	Animalia	Chordata	Reptilia	Squamata	Colubridae	Boiga	Boiga irregularis		Brown tree snake	Terrestrial	terrestrial					Oceania/Pacific Islands	USA	Hawaii	Hawaii	Site	2004	Year	2004	Unspecified	2004	2004	Potentially ongoing	1700000000			2206141137	2206141137	1700000000	2206141137	2206141137	USD	2004	Publication year	Observed
769	GS	300	Biology and Impacts of Pacific Island Invasive Species: 2. Boiga irregularis, the Brown Tree Snake (Reptilia: Colubridae)	Rodda and Savidge		2007	English	Peer-reviewed article	NA	Yes	Animalia	Chordata	Reptilia	Squamata	Colubridae	Boiga	Boiga irregularis		Brown tree snake	Terrestrial	terrestrial					Oceania/Pacific Islands	USA		Guam	Site	2007	Year	2007	Unspecified	2007	2007	Potentially ongoing	1500000	1000000	2000000	1.7733e+06	1.7733e+06	1500000	1.7733e+06	1.7733e+06	USD	2007	Publication year	Observed
770	GS	300	Biology and Impacts of Pacific Island Invasive Species: 2. Boiga irregularis, the Brown Tree Snake (Reptilia: Colubridae)	Rodda and Savidge		2007	English	Peer-reviewed article	NA	Yes	Animalia	Chordata	Reptilia	Squamata	Colubridae	Boiga	Boiga irregularis		Brown tree snake	Terrestrial	terrestrial					Oceania/Pacific Islands	USA	Hawaii	Hawaii	Site	2007	Year	2007	Unspecified	2007	2007	Potentially ongoing	1000000000	500000000	1500000000	1182197002	1182197002	1000000000	1182197002	1182197002	USD	2007	Publication year	Observed
805	TC	453	Optimal prevention and control of invasive species: the case of the Brown Treesnake	Burnett		2007	English	Thesis	D’Evelyn, S. T., Tarui, N., Burnett, K., & Roumasset, J. A. (2008). Learning-by-catching: Uncertain invasive-species populations and the value of information. Journal of Environmental Management, 89(4), 284–292. https://doi.org/10.1016/j.jenvman.2007.04.027	Yes	Animalia	Chordata	Reptilia	Squamata	Colubridae	Boiga	Boiga irregularis		Brown tree snake	Terrestrial	terrestrial					Oceania/Pacific Islands	USA	Hawaii	Hawaii	Site	2007	Year	2007	Unspecified	2007	2007	Potentially ongoing	2600000			3.07371e+06	3.07371e+06	2600000	3.07371e+06	3.07371e+06	USD	2007	Publication year	Observed
806	TC	453	Optimal prevention and control of invasive species: the case of the Brown Treesnake	Burnett		2007	English	Thesis	D’Evelyn, S. T., Tarui, N., Burnett, K., & Roumasset, J. A. (2008). Learning-by-catching: Uncertain invasive-species populations and the value of information. Journal of Environmental Management, 89(4), 284–292. https://doi.org/10.1016/j.jenvman.2007.04.027	Yes	Animalia	Chordata	Reptilia	Squamata	Colubridae	Boiga	Boiga irregularis		Brown tree snake	Terrestrial	terrestrial					Oceania/Pacific Islands	USA	Hawaii	Hawaii	Site	2007	Year	2007	Unspecified	2007	2007	Potentially ongoing	76000			89847	89847	76000	89847	89847	USD	2007	Publication year	Observed
807	GS	190	Learning-by-catching: Uncertain invasive-species populations and the value of information	D’Evelyn et al		2008	English	Peer-reviewed article	NA	Yes	Animalia	Chordata	Reptilia	Squamata	Colubridae	Boiga	Boiga irregularis		Brown tree snake	Terrestrial	terrestrial					Oceania/Pacific Islands	USA		Saipan Island	Site	20 years	Period	2008	2028	2008	2028	Potentially ongoing	46250000	13600000	78900000	5.26551e+07	5.26551e+07	2312500	2.63276e+06	2.63276e+06	USD	2008	Publication year	Potential
808	TC	515	Snakes on electrical transmission lines: Patterns, causes, and strategies for reducing electrical outages due to snakes	Fritts and Chizar		1999	English	Book chapter	Pitt, W., Vice, D., & Pitzler, M. (2005). Challenges of invasive reptiles and amphibians. Wildlife Damage Management Conferences, 112–119.	No	Animalia	Chordata	Reptilia	Squamata	Colubridae	Boiga	Boiga irregularis		Brown tree snake	Terrestrial	terrestrial					Oceania/Pacific Islands	USA		Guam Island	Site	Unspecified	Year	Unspecified	Unspecified	1999	1999	Potentially ongoing	1400000			2.06014e+06	2.06014e+06	1400000	2.06014e+06	2.06014e+06	USD	1999	Publication year	Observed
809	GS	187	Just Green Iguanas? The associated costs and policy implications of exotic invasive wildlife in South Florida	Sementelli et al		2008	English	Peer-reviewed article	NA	Yes	Animalia	Chordata	Reptilia	Squamata	Iguanidae	Iguana	Iguana iguana		Green iguana	Terrestrial	terrestrial					North America	USA		South Florida	Unit (Hole)	2008	Year	2008	2008	2008	2008	Potentially ongoing	400			455.4	455.4	400	455.4	455.4	USD	2008	Publication year	Observed
810	GS	246	Spatial economic analysis of early detection and rapid response strategies for an invasive species	Kaiser and Burnett		2010	English	Peer-reviewed article	NA	Yes	Animalia	Chordata	Reptilia	Squamata	Colubridae	Boiga	Boiga irregularis		Brown tree snake	Terrestrial	terrestrial					Oceania/Pacific Islands	USA	Hawaii	Hawaii (Oahu)	Site	30 years	Period	2010	2040	2010	2040	Potentially ongoing	224000000	77000000	371000000	2.51802e+08	2.51802e+08	7.46667e+06	8.3934e+06	8.3934e+06	USD	2010	Publication year	Potential
811	TC	266	Economic drivers of biological invasions. A World-Wide, Bio-Geographical Analysis	Dalmazzone et al		2012	English	Peer-reviewed article	Marbuah, G., Gren, I. M., & McKie, B. (2014). Economics of Harmful Invasive Species: A Review. Diversity, 6(3), 500–523. https://doi.org/10.3390/d6030500	Yes	Animalia	Chordata	Amphibia/Reptilia	Diverse/Unspecified	Diverse/Unspecified	Diverse/Unspecified	Diverse/Unspecified			Aquatic/Terrestrial	diverse/Unspecified					North America	USA		Unspecified	Unit (Species)	Unspecified	Year	Unspecified	Unspecified	2012	2012	Potentially ongoing	102000	54000	150000	108897	108897	102000	108897	108897	USD	2012	Publication year	Potential
812	TC	333	Fiscal year 2005 interagency invasive species performance-based budget	National Invasive Species Council		2004	English	Official report	Simberloff, D., Parker, I. M., & Windle, P. N. (2005). Introduced species policy, management, and future research needs. Frontiers in Ecology and the Environment, 3(1), 12–20. https://doi.org/10.1890/1540-9295(2005)003[0012:ispmaf]2.0.co;2	No	Animalia	Chordata	Reptilia	Squamata	Colubridae	Boiga	Boiga irregularis		Brown tree snake	Terrestrial	terrestrial					North America	USA		Unspecified	Country	2004	Year	2004	Unspecified	2004	2004	Potentially ongoing	3368000			4.37075e+06	4.37075e+06	3368000	4.37075e+06	4.37075e+06	USD	2004	Effective	Observed
813	TC	333	Fiscal year 2005 interagency invasive species performance-based budget	National Invasive Species Council		2005	English	Official report	Simberloff, D., Parker, I. M., & Windle, P. N. (2005). Introduced species policy, management, and future research needs. Frontiers in Ecology and the Environment, 3(1), 12–20. https://doi.org/10.1890/1540-9295(2005)003[0012:ispmaf]2.0.co;2	No	Animalia	Chordata	Reptilia	Squamata	Colubridae	Boiga	Boiga irregularis		Brown tree snake	Terrestrial	terrestrial					North America	USA		Unspecified	Country	2005	Year	2005	Unspecified	2005	2005	Potentially ongoing	4247000			5.33061e+06	5.33061e+06	4247000	5.33061e+06	5.33061e+06	USD	2005	Effective	Observed
814	TC	385	Invasive species: Federal and selected state funding to address harmful nonnative species, GAO/RCED-00-219	General Accounting Office, US Congress		2000	English	Official report	Simberloff, D., Parker, I. M., & Windle, P. N. (2005). Introduced species policy, management, and future research needs. Frontiers in Ecology and the Environment, 3(1), 12–20. https://doi.org/10.1890/1540-9295(2005)003[0012:ispmaf]2.0.co;2	Yes	Animalia	Chordata	Amphibia/Reptilia	Diverse/Unspecified	Diverse/Unspecified	Diverse/Unspecified	Diverse/Unspecified		Amphibia/Reptilia	Terrestrial	terrestrial					North America	USA		Unspecified	Country	1999	Year	1999	Unspecified	1999	1999	Potentially ongoing	4800000			7.06333e+06	7.06333e+06	4800000	7.06333e+06	7.06333e+06	USD	1999	Effective	Observed
815	GS	227	Prevention, eradication, and containment of invasive species: Illustrations from Hawaii	Burnett et al		2006	English	Peer-reviewed article	NA	Yes	Animalia	Chordata	Reptilia	Squamata	Colubridae	Boiga	Boiga irregularis		Brown tree snake	Terrestrial	terrestrial					Oceania/Pacific Islands	USA	Hawaii	Hawaii	Site	2006	Year	2006	Unspecified	2006	2006	Potentially ongoing	4800000000			5836421810	5836421810	4800000000	5836421810	5836421810	USD	2006	Publication year	Potential
816	GS	227	Prevention, eradication, and containment of invasive species: Illustrations from Hawaii	Burnett et al		2006	English	Peer-reviewed article	NA	Yes	Animalia	Chordata	Reptilia	Squamata	Colubridae	Boiga	Boiga irregularis		Brown tree snake	Terrestrial	terrestrial					Oceania/Pacific Islands	USA	Hawaii	Hawaii	Site	2006	Year	2006	Unspecified	2006	2006	Potentially ongoing	344397			418760	418760	344397	418760	418760	USD	2006	Publication year	Potential
817	Go	119	The Economic Impact of Invasive Species To Wildlife Services’ Cooperators	Bergman et al		2000	English	Conference proceedings	NA	Yes	Animalia	Chordata	Reptilia	Diverse/Unspecified	Diverse/Unspecified	Diverse/Unspecified	Diverse/Unspecified		Diverse (reptiles)	Terrestrial	terrestrial					North America	USA		Unspecified	Country	1990-1997	Period	1990	1997	1990	1997	Potentially ongoing	1226717			1.74618e+06	1.74618e+06	153340	218273	218273	USD	2000	Publication year	Observed
818	GS	296	Why DOD is interested in invasive species	Dalsimer		2002	English	Peer-reviewed article	NA	Yes	Animalia	Chordata	Reptilia	Squamata	Colubridae	Boiga	Boiga irregularis		Brown tree snake	Terrestrial	terrestrial					North America	USA		Unspecified	Country	2002	Year	2002	Unspecified	2002	2002	Potentially ongoing	1000000			1.36272e+06	1.36272e+06	1000000	1.36272e+06	1.36272e+06	USD	2002	Publication year	Observed
820	TC	480	Protecting Hawaii from Invasive Pests	Coordinating Group on Alien Pest Species		2001	English	Official report	IKUMA, E. K., SUGANO, D., & MARDFIN, J. K. (2002). Filling the Gaps in the Fight Against Invasive Species. Honolulu, Hawaii.	Yes	Animalia	Chordata	Reptilia	Squamata	Colubridae	Boiga	Boiga irregularis		Brown tree snake	Terrestrial	terrestrial					Oceania/Pacific Islands	USA	Hawaii	Hawaii	Site	1997	Year	1997	Unspecified	1997	1997	Potentially ongoing	1600000			2.44331e+06	2.44331e+06	1600000	2.44331e+06	2.44331e+06	USD	1997	Effective	Observed
821	TC	480	Protecting Hawaii from Invasive Pests	Coordinating Group on Alien Pest Species		2001	English	Official report	IKUMA, E. K., SUGANO, D., & MARDFIN, J. K. (2002). Filling the Gaps in the Fight Against Invasive Species. Honolulu, Hawaii.	Yes	Animalia	Chordata	Reptilia	Squamata	Colubridae	Boiga	Boiga irregularis		Brown tree snake	Terrestrial	terrestrial					Oceania/Pacific Islands	USA	Hawaii	Hawaii	Site	1998	Year	1998	Unspecified	1998	1998	Potentially ongoing	3600000			5.41341e+06	5.41341e+06	3600000	5.41341e+06	5.41341e+06	USD	1998	Effective	Observed
822	GS	100	Filling the Gaps in the Fight Against Invasive Species	Ikuma et al		2002	English	Official report	NA	Yes	Animalia	Chordata	Reptilia	Squamata	Colubridae	Boiga	Boiga irregularis		Brown tree snake	Terrestrial	terrestrial					Oceania/Pacific Islands	USA		Guam	Site	2002	Year	2002	Unspecified	2002	2002	Potentially ongoing	1000000			1.36272e+06	1.36272e+06	1000000	1.36272e+06	1.36272e+06	USD	2002	Publication year	Observed
823	GS	86	Environmental and Economic Costs of Nonindigenous Species in the United States	Pimentel et al		2000	English	Peer-reviewed article	NA	Yes	Animalia	Chordata	Reptilia	Squamata	Colubridae	Boiga	Boiga irregularis		Brown tree snake	Terrestrial	terrestrial					Oceania/Pacific Islands	USA		Guam	Site	2000	Year	2000	Unspecified	2000	2000	Potentially ongoing	1000000			1.42346e+06	1.42346e+06	1000000	1.42346e+06	1.42346e+06	USD	2000	Publication year	Observed
824	GS	86	Environmental and Economic Costs of Nonindigenous Species in the United States	Pimentel et al		2000	English	Peer-reviewed article	NA	Yes	Animalia	Chordata	Reptilia	Squamata	Colubridae	Boiga	Boiga irregularis		Brown tree snake	Terrestrial	terrestrial					Oceania/Pacific Islands	USA		Guam	Site	2000	Year	2000	Unspecified	2000	2000	Potentially ongoing	25000			35586.5	35586.5	25000	35586.5	35586.5	USD	2000	Publication year	Observed
825	GS	86	Environmental and Economic Costs of Nonindigenous Species in the United States	Pimentel et al		2000	English	Peer-reviewed article	NA	Yes	Animalia	Chordata	Reptilia	Squamata	Colubridae	Boiga	Boiga irregularis		Brown tree snake	Terrestrial	terrestrial					Oceania/Pacific Islands	USA		Guam	Site	2000	Year	2000	Unspecified	2000	2000	Potentially ongoing	2000000			2.84692e+06	2.84692e+06	2000000	2.84692e+06	2.84692e+06	USD	2000	Publication year	Observed
826	TC	348	Hawaii's reptilian nightmare	Holt		1998	English	Official report	Pimentel, D., Lach, L., Zuniga, R., & Morrison, D. (2000). Environmental and Economic Costs of Nonindigenous Species in the United States. BioScience, 50(9), 783–792. https://doi.org/10.1641/0006-3568(2000)050	No	Animalia	Chordata	Reptilia	Squamata	Colubridae	Boiga	Boiga irregularis		Brown tree snake	Terrestrial	terrestrial					Oceania/Pacific Islands	USA	Hawaii	Hawaii	Site	1998	Year	1998	Unspecified	1998	1998	Potentially ongoing	1600000			2.40596e+06	2.40596e+06	1600000	2.40596e+06	2.40596e+06	USD	1998	Publication year	Observed
829	TC	291	Environmental valuation and the Hawaiian economy	Kaiser et al		1999	English	Official report	NA	Yes	Animalia	Chordata	Reptilia	Squamata	Colubridae	Boiga	Boiga irregularis		Brown tree snake	Terrestrial	terrestrial					Oceania/Pacific Islands	USA	Hawaii	Hawaii	Site	1999	Year	1999	Unspecified	1999	1999	Potentially ongoing	216845300	28515800	405174800	319093679	319093679	216845300	319093679	319093679	USD	1999	Publication year	Potential
830	TC	291	Environmental valuation and the Hawaiian economy	Kaiser et al		1999	English	Official report	NA	Yes	Animalia	Chordata	Reptilia	Squamata	Colubridae	Boiga	Boiga irregularis		Brown tree snake	Terrestrial	terrestrial					Oceania/Pacific Islands	USA	Hawaii	Hawaii	Site	1999	Year	1999	Unspecified	1999	1999	Potentially ongoing	19750000	1600000	37900000	2.90627e+07	2.90627e+07	19750000	2.90627e+07	2.90627e+07	USD	1999	Publication year	Potential
831	TC	291	Environmental valuation and the Hawaiian economy	Kaiser et al		1999	English	Official report	NA	Yes	Animalia	Chordata	Reptilia	Squamata	Colubridae	Boiga	Boiga irregularis		Brown tree snake	Terrestrial	terrestrial					Oceania/Pacific Islands	USA	Hawaii	Hawaii	Site	1999	Year	1999	Unspecified	1999	1999	Potentially ongoing	145629005	97352900	193905110	2.14297e+08	2.14297e+08	145629005	2.14297e+08	2.14297e+08	USD	1999	Publication year	Potential
832	TC	346	Harmful Non-Indigenous Species in the United States	U.S. Congress, Office of Technology Assessment		1993	English	Official report	NA	Yes	Animalia	Chordata	Reptilia	Squamata	Colubridae	Boiga	Boiga irregularis		Brown tree snake	Terrestrial	terrestrial					Oceania/Pacific Islands	USA	Hawaii	Hawaii	Site	1992	Year	1992	Unspecified	1992	1992	Potentially ongoing	1000000			1.7469e+06	1.7469e+06	1000000	1.7469e+06	1.7469e+06	USD	1992	Effective	Observed
845	TC	427	Monk Parakeet Management at Electric Utility Facilities in South Florida	Avery et al		2002	English	Peer-reviewed article	NA	Yes	Animalia	Chordata	Aves	Psittaciformes	Psittacidae	Myiopsitta	Myiopsitta monachus		Monk parakeet	Terrestrial	terrestrial					North America	USA		South Florida	Site	2001	Year	2001	Unspecified	2001	2001	Potentially ongoing	556000			757673	757673	556000	757673	757673	USD	2002	Publication year	Observed
846	TC	427	Monk Parakeet Management at Electric Utility Facilities in South Florida	Avery et al		2002	English	Peer-reviewed article	NA	Yes	Animalia	Chordata	Aves	Psittaciformes	Psittacidae	Myiopsitta	Myiopsitta monachus		Monk parakeet	Terrestrial	terrestrial					North America	USA		South Florida	Site	2001	Year	2001	Unspecified	2001	2001	Potentially ongoing	37000			50420.7	50420.7	37000	50420.7	50420.7	USD	2002	Publication year	Observed
847	TC	427	Monk Parakeet Management at Electric Utility Facilities in South Florida	Avery et al		2002	English	Peer-reviewed article	NA	Yes	Animalia	Chordata	Aves	Psittaciformes	Psittacidae	Myiopsitta	Myiopsitta monachus		Monk parakeet	Terrestrial	terrestrial					North America	USA		South Florida	Site	Unspecified	Year	Unspecified	Unspecified	2002	2002	One-time	460650			627738	627738	460650	627738	627738	USD	2002	Publication year	Observed
848	TC	427	Monk Parakeet Management at Electric Utility Facilities in South Florida	Avery et al		2002	English	Conference proceedings	NA	Yes	Animalia	Chordata	Aves	Psittaciformes	Psittacidae	Myiopsitta	Myiopsitta monachus		Monk parakeet	Terrestrial	terrestrial					North America	USA		South Florida	Site	2002	Year	2002	2002	2002	2002	One-time	1665000			2.26893e+06	2.26893e+06	1665000	2.26893e+06	2.26893e+06	USD	2002	Publication year	Potential
849	TC	246	Diazacon inhibits reproduction in invasive Monk Parakeet populations.	Avery et al		2007	English	Peer-reviewed article	Burgio, K. R., Kramer, D., Rubega, M. A., & Sustaita, D. (2014). Nest-building behavior of Monk Parakeets and insights into potential mechanisms for reducing damage to utility poles. https://doi.org/10.7717/peerj.601	Yes	Animalia	Chordata	Aves	Psittaciformes	Psittacidae	Myiopsitta	Myiopsitta monachus		Monk parakeet	Terrestrial	terrestrial					North America	USA		South Florida	Site	5 years	Period	2002	2007	2002	2007	One-time	3000000	1300000	4700000	3.54659e+06	3.54659e+06	600000	709318	709318	USD	2007	Publication year	Observed
850	TC	370	Introduccion, distribuccion, biologia, etologia y control de la Madame Sarah an la Hispaniola	Peña		1977	English	Official report	Macgregor-Fors, I., Calderón-Parra, R., Meléndez-Herrada, A., López-López, S., & Schondube, J. E. (2011). Pretty, but dangerous! Records of non-native Monk Parakeets (Myiopsitta monachus) in Mexico. Revista Mexicana de Biodiversidad, 82, 1053–1056. Retrieved from http://www.ib.unam.mx/m/revista/pdfs/34-739.pdf ID8523 --> De Grazio, J. W. (1978). World bird damage problems. Proceedings of the 8th …	No	Animalia	Chordata	Aves	Passeriformes	Ploceidae	Ploceus	Ploceus melanocephalus		Black-headed Weaver	Terrestrial	terrestrial					Central America	Dominican Republic		Unspecified	Country	1971	Year	1971	Unspecified	1971	1971	Potentially ongoing	7000000			2.83103e+07		7000000	2.83103e+07		USD	1977	Publication year	Observed
856	TC	491	Reducing Risk and Enhancing Efficiency in Non-Native Vertebrate Removal Efforts on Islands: A 25 Year Multi-Taxa Retrospective from Santa Cruz Island, California	Morrison		2007	English	Peer-reviewed article	Towns, D. R., & Broome, K. G. (2003). From small Maria to massive Campbell: forty years of rat eradications from New Zealand islands. New Zealand Journal of Zoology, 30, 377–398. Retrieved from http://www.tandfonline.com/doi/pdf/10.1080/03014223.2003.9518348?needAccess=true	Yes	Animalia	Chordata	Aves	Accipitriformes	Accipitridae	Aquila	Aquila chrysaetos		Golden eagle	Terrestrial	terrestrial				Y	North America	USA		Northern Channel Islands	Site	1999-2001	Period	1999	2001	1999	2001	One-time	795000			939847	939847	265000	313282	313282	USD	2007	Publication year	Observed
857	TC	491	Reducing Risk and Enhancing Efficiency in Non-Native Vertebrate Removal Efforts on Islands: A 25 Year Multi-Taxa Retrospective from Santa Cruz Island, California	Morrison		2007	English	Peer-reviewed article	Towns, D. R., & Broome, K. G. (2003). From small Maria to massive Campbell: forty years of rat eradications from New Zealand islands. New Zealand Journal of Zoology, 30, 377–398. Retrieved from http://www.tandfonline.com/doi/pdf/10.1080/03014223.2003.9518348?needAccess=true	Yes	Animalia	Chordata	Aves	Accipitriformes	Accipitridae	Aquila	Aquila chrysaetos		Golden eagle	Terrestrial	terrestrial				Y	North America	USA		Northern Channel Islands	Site	2002-2004	Period	2002	2004	2002	2004	One-time	1518000			1.79458e+06	1.79458e+06	506000	598192	598192	USD	2007	Publication year	Observed
858	TC	491	Reducing Risk and Enhancing Efficiency in Non-Native Vertebrate Removal Efforts on Islands: A 25 Year Multi-Taxa Retrospective from Santa Cruz Island, California	Morrison		2007	English	Peer-reviewed article	Towns, D. R., & Broome, K. G. (2003). From small Maria to massive Campbell: forty years of rat eradications from New Zealand islands. New Zealand Journal of Zoology, 30, 377–398. Retrieved from http://www.tandfonline.com/doi/pdf/10.1080/03014223.2003.9518348?needAccess=true	Yes	Animalia	Chordata	Aves	Accipitriformes	Accipitridae	Aquila	Aquila chrysaetos		Golden eagle	Terrestrial	terrestrial				Y	North America	USA		Northern Channel Islands	Site	2005	Year	2005	Unspecified	2005	2005	Potentially ongoing	481000			568637	568637	481000	568637	568637	USD	2007	Publication year	Observed
859	TC	491	Reducing Risk and Enhancing Efficiency in Non-Native Vertebrate Removal Efforts on Islands: A 25 Year Multi-Taxa Retrospective from Santa Cruz Island, California	Morrison		2007	English	Peer-reviewed article	Towns, D. R., & Broome, K. G. (2003). From small Maria to massive Campbell: forty years of rat eradications from New Zealand islands. New Zealand Journal of Zoology, 30, 377–398. Retrieved from http://www.tandfonline.com/doi/pdf/10.1080/03014223.2003.9518348?needAccess=true	Yes	Animalia	Chordata	Aves	Galliformes	Phasianidae	Meleagris	Meleagris gallopavo		Wild Turkey	Terrestrial	terrestrial				Y	North America	USA		Santa Cruz Island	Site	Unspecified	Year	Unspecified	Unspecified	2007	2007	One-time	55000			65020.8	65020.8	55000	65020.8	65020.8	USD	2007	Publication year	Observed
860	WoS	4882	Integrating invasion and disease in the risk assessment of live bird trade	Springborn et al		2015	English	Peer-reviewed article	NA	Yes	Animalia	Chordata	Aves	Diverse/Unspecified	Diverse/Unspecified	Diverse/Unspecified	Diverse/Unspecified		All introduced birds	Terrestrial	terrestrial					North America	USA		Unspecified	Unit (Species)	Unspecified	Year	Unspecified	Unspecified	2015	2015	Potentially ongoing	3038000			3.41506e+06	3.41506e+06	3038000	3.41506e+06	3.41506e+06	USD	2010	Effective	Potential
861	WoS	4882	Integrating invasion and disease in the risk assessment of live bird trade	Springborn et al		2015	English	Peer-reviewed article	NA	Yes	Animalia	Chordata	Aves	Diverse/Unspecified	Diverse/Unspecified	Diverse/Unspecified	Diverse/Unspecified		All introduced/established birds	Terrestrial	terrestrial					North America	USA		Unspecified	Unit (Species)	Unspecified	Year	Unspecified	Unspecified	2015	2015	Potentially ongoing	4000000	2000000	6000000	4.49646e+06	4.49646e+06	4000000	4.49646e+06	4.49646e+06	USD	2010	Effective	Potential
862	WoS	4882	Integrating invasion and disease in the risk assessment of live bird trade	Springborn et al		2015	English	Peer-reviewed article	NA	Yes	Animalia	Chordata	Aves	Diverse/Unspecified	Diverse/Unspecified	Diverse/Unspecified	Diverse/Unspecified		All introduced/established birds	Terrestrial	terrestrial					North America	USA		Unspecified	Unit (Species)	Unspecified	Year	Unspecified	Unspecified	2015	2015	Potentially ongoing	35000			39344.1	39344.1	35000	39344.1	39344.1	USD	2010	Effective	Potential
863	GS	86	Environmental and Economic Costs of Nonindigenous Species in the United States	Pimentel et al		2000	English	Peer-reviewed article	NA	Yes	Animalia	Chordata	Aves	Passeriformes	Sturnidae	Sturnus	Sturnus vulgaris		Common starling	Terrestrial	terrestrial					North America	USA		Unspecified	Country	2010	Year	2000	Unspecified	2000	2000	Potentially ongoing	800000000			1138766938	1138766938	800000000	1138766938	1138766938	USD	2000	Publication year	Observed
867	TC	523	Starlings in Western Australia: assessing the likely cost of an incursion	ACIL Economics and Policy Pty Ltd.		2006	English	Official report	NA	Yes	Animalia	Chordata	Aves	Passeriformes	Sturnidae	Sturnus	Sturnus vulgaris		Common starling	Terrestrial	terrestrial					North America	USA		Unspecified	Country	Unspecified	Year	Unspecified	Unspecified	2006	2006	Potentially ongoing	1500000			1.82388e+06	1.82388e+06	1500000	1.82388e+06	1.82388e+06	USD	2006	Publication year	Observed
869	TC	611	USDA's Wildlife Services program	AgNIC Wildlife Damage Management Web site		2006	English	Web page	ACIL Tasman. (2006). Starlings in Western Australia: assessing the likely cost of an incursion. Unpublished Report, ACIL Tasman, Perth, Australia.	No	Animalia	Chordata	Aves	Passeriformes	Sturnidae	Sturnus	Sturnus vulgaris		Common starling	Terrestrial	terrestrial					North America	USA		Unspecified	Country	2006	Year	2006	Unspecified	2006	2006	Potentially ongoing	3151184	235067	4137119	3.83159e+06	3.83159e+06	3151184	3.83159e+06	3.83159e+06	USD	2006	Publication year	Observed
870	GS	95	European Starlings : a Review of an Invasive Species With Far-Reaching Impacts	Linz et al		2007	English	Conference proceedings	NA	Yes	Animalia	Chordata	Aves	Passeriformes	Sturnidae	Sturnus	Sturnus vulgaris		Common starling	Terrestrial	terrestrial					North America	USA		Omaha/Nebraska	Site	2007	Year	2007	2007	2007	2007	Potentially ongoing	200000			236439	236439	200000	236439	236439	USD	2007	Publication year	Observed
874	TC	385	Invasive species: Federal and selected state funding to address harmful nonnative species, GAO/RCED-00-219	General Accounting Office, US Congress		2000	English	Official report	Simberloff, D., Parker, I. M., & Windle, P. N. (2005). Introduced species policy, management, and future research needs. Frontiers in Ecology and the Environment, 3(1), 12–20. https://doi.org/10.1890/1540-9295(2005)003[0012:ispmaf]2.0.co;2	Yes	Animalia	Chordata	Aves	Diverse/Unspecified	Diverse/Unspecified	Diverse/Unspecified	Diverse/Unspecified		Birds	Terrestrial	terrestrial					North America	USA		Unspecified	Country	1999	Year	1999	Unspecified	1999	1999	Potentially ongoing	200000			294305	294305	200000	294305	294305	USD	1999	Effective	Observed
877	GS	308	Invasive alien species: The urban dimension	van Ham et al		2013	English	Book	NA	Yes	Animalia	Chordata	Aves	Psittaciformes	Psittacidae	Myiopsitta	Myiopsitta monachus		Monk parakeet	Terrestrial	terrestrial					North America	USA		Unspecified	Country	5 years	Period	2008	2013	2008	2013	Potentially ongoing	3000000	1300000	4700000	3.15663e+06	3.15663e+06	600000	631326	631326	USD	2013	Publication year	Observed
880	Go	119	The Economic Impact of Invasive Species To Wildlife Services’ Cooperators	Bergman et al		2000	English	Conference proceedings	NA	Yes	Animalia	Chordata	Aves	Diverse/Unspecified	Diverse/Unspecified	Diverse/Unspecified	Diverse/Unspecified		Diverse (birds)	Terrestrial	terrestrial					North America	USA		Unspecified	Country	1990-1997	Year	1990	1997	1990	1997	Potentially ongoing	3524320			5.01672e+06	5.01672e+06	3524320	5.01672e+06	5.01672e+06	USD	2000	Publication year	Observed
881	TC	569	The economics of starling damage	Feare		1980	English	Book chapter	Pimentel D., Pimentel M. and Wilson A. (2007) Plant,Animal,and Microbe Invasive Species in the United States and World In Nentwig, W. (ed). Biological Invasions https://doi.org/10.1007/978-3-540-36920-2	No	Animalia	Chordata	Aves	Passeriformes	Sturnidae	Sturnus	Sturnus vulgaris		Common starling	Terrestrial	terrestrial					North America	USA		Unspecified	Unit (Ha)	1980	Year	1980	Unspecified	1980	1980	Potentially ongoing	2000			5948.9	5948.9	2000	5948.9	5948.9	USD	1980	Publication year	Observed
882	TC	569	The economics of starling damage	Feare		1980	English	Book chapter	Pimentel, D., Lach, L., Zuniga, R., & Morrison, D. (2000). Environmental and Economic Costs of Nonindigenous Species in the United States. BioScience, 50(9), 783–792. https://doi.org/10.1641/0006-3568(2000)050	No	Animalia	Chordata	Aves	Passeriformes	Sturnidae	Sturnus	Sturnus vulgaris		Common starling	Terrestrial	terrestrial					North America	USA		Unspecified	Unit (Ha)	1980	Year	1980	Unspecified	1980	1980	Potentially ongoing	6			17.85	17.85	6	17.85	17.85	USD	1980	Publication year	Observed
883	GS	86	Environmental and Economic Costs of Nonindigenous Species in the United States	Pimentel et al		2000	English	Peer-reviewed article	NA	Yes	Animalia	Chordata	Aves	Columbiformes	Columbidae	Columba	Columba livia		Pigeon biset	Terrestrial	terrestrial					North America	USA		Unspecified	Country	2000	Year	2000	Unspecified	2000	2000	Potentially ongoing	1100000000			1565804539	1565804539	1100000000	1565804539	1565804539	USD	2000	Publication year	Observed
886	TC	372	Introduced Species: An Overview of Damages Caused by the Introduction of Some Alien Species to Hawaii	Hawaii Agricultural Alliance		1991	English	Official report	OTA. (1993). Harmful Non-Indigenous Species in the United States. Ota-F-565, (September). Retrieved from https://www.anstaskforce.gov/Documents/OTA_Report_1993.pdf	No	Animalia	Chordata	Aves	Passeriformes	Pycnonotidae	Pycnonotus	Pycnonotus cafer/Pycnonotus jocosus		Red-whiskered bulbul/Red-vented bulbul	Terrestrial	terrestrial					Oceania/Pacific Islands	USA	Hawaii	Hawaii	Site	1989	Year	1989	Unspecified	1989	1989	Potentially ongoing	300000			593191	593191	300000	593191	593191	USD	1989	Effective	Observed
889	WoS	13335	Environmental consequences and economic costs of alien species	Pimentel		2005	English	Peer-reviewed article	NA	Yes	Animalia	Chordata	Aves	Passeriformes	Passeridae	Diverse/Unspecified	Diverse/Unspecified		Sparrows	Terrestrial	terrestrial					North America	USA		Unspecified	Country	2005	Year	2005	Unspecified	2005	2005	Potentially ongoing	200000000			2.51029e+08	2.51029e+08	200000000	2.51029e+08	2.51029e+08	USD	2005	Publication year	Observed
894	WoS	5527	Pathway-level risk analysis: the net present value of an invasive species policy in the US	Leung et al		2014	English	Peer-reviewed article	NA	Yes	Diverse/Unspecified	Diverse/Unspecified	Diverse/Unspecified	Diverse/Unspecified	Diverse/Unspecified	Diverse/Unspecified	Diverse/Unspecified			Aquatic/Terrestrial	diverse/Unspecified					North America	USA		Unspecified	Country	2004-2050	Period	2004	2050	2004	2050	Potentially ongoing	20539000000			26654078119	26654078119	437000000	5.67108e+08	5.67108e+08	USD	2004	Effective	Potential
895	WoS	5527	Pathway-level risk analysis: the net present value of an invasive species policy in the US	Leung et al		2014	English	Peer-reviewed article	NA	Yes	Animalia	Arthropoda	Insecta	Diverse/Unspecified	Diverse/Unspecified	Diverse/Unspecified	Diverse/Unspecified		Wood boring pests	Terrestrial	terrestrial					North America	USA		Unspecified	Country	2004-2050	Period	2004	2050	2004	2050	Potentially ongoing	11900000000			15442987956	15442987956	2.53191e+08	3.28574e+08	3.28574e+08	USD	2004	Effective	Potential
900	GS	17	A successful model from Hawaii for rapid response to invasive species	Kraus and Duffy		2010	English	Peer-reviewed article	NA	Yes	Diverse/Unspecified	Diverse/Unspecified	Diverse/Unspecified	Diverse/Unspecified	Diverse/Unspecified	Diverse/Unspecified	Diverse/Unspecified		All invasive species	Aquatic/Terrestrial	diverse/Unspecified					Oceania/Pacific Islands	USA	Hawaii	Hawaii	Site	2006	Year	2006	Unspecified	2006	2006	Potentially ongoing	2639000			3.20882e+06	3.20882e+06	2639000	3.20882e+06	3.20882e+06	USD	2006	Effective	Observed
901	TC	494	Report to the Twenty-fourth Legislature regular session of 2008: budgetary and other issues regarding invasive species	THE STATE OF HAWAII DEPARTMENT OF LAND AND NATURAL RESOURCES DIVISION OF FORESTRY AND WILDLIFE		2007	English	Official report	Kraus, F., & Duffy, D. C. (2010). A successful model from Hawaii for rapid response to invasive species. Journal for Nature Conservation, 18(2), 135–141. https://doi.org/10.1016/j.jnc.2009.07.001	Yes	Diverse/Unspecified	Diverse/Unspecified	Diverse/Unspecified	Diverse/Unspecified	Diverse/Unspecified	Diverse/Unspecified	Diverse/Unspecified			Aquatic/Terrestrial	diverse/Unspecified					Oceania/Pacific Islands	USA	Hawaii	Hawaii	Site	2006	Year	2006	Unspecified	2006	2006	Potentially ongoing	153000000			1.86036e+08	1.86036e+08	153000000	1.86036e+08	1.86036e+08	USD	2006	Effective	Observed
902	TC	494	Report to the Twenty-fourth Legislature regular session of 2008: budgetary and other issues regarding invasive species	THE STATE OF HAWAII DEPARTMENT OF LAND AND NATURAL RESOURCES DIVISION OF FORESTRY AND WILDLIFE		2008	English	Official report	Kraus, F., & Duffy, D. C. (2010). A successful model from Hawaii for rapid response to invasive species. Journal for Nature Conservation, 18(2), 135–141. https://doi.org/10.1016/j.jnc.2009.07.001	Yes	Diverse/Unspecified	Diverse/Unspecified	Diverse/Unspecified	Diverse/Unspecified	Diverse/Unspecified	Diverse/Unspecified	Diverse/Unspecified			Aquatic/Terrestrial	diverse/Unspecified					Oceania/Pacific Islands	USA	Hawaii	Hawaii	Site	2008	Year	2008	Unspecified	2008	2008	Potentially ongoing	736400			838383	838383	736400	838383	838383	USD	2008	Effective	Observed
903	TC	494	Report to the Twenty-fourth Legislature regular session of 2008: budgetary and other issues regarding invasive species	THE STATE OF HAWAII DEPARTMENT OF LAND AND NATURAL RESOURCES DIVISION OF FORESTRY AND WILDLIFE		2008	English	Official report	Kraus, F., & Duffy, D. C. (2010). A successful model from Hawaii for rapid response to invasive species. Journal for Nature Conservation, 18(2), 135–141. https://doi.org/10.1016/j.jnc.2009.07.001	Yes	Diverse/Unspecified	Diverse/Unspecified	Diverse/Unspecified	Diverse/Unspecified	Diverse/Unspecified	Diverse/Unspecified	Diverse/Unspecified			Aquatic/Terrestrial	diverse/Unspecified					Oceania/Pacific Islands	USA	Hawaii	Hawaii	Site	2008	Year	2008	Unspecified	2008	2008	Potentially ongoing	700000			796942	796942	700000	796942	796942	USD	2008	Effective	Observed
904	TC	494	Report to the Twenty-fourth Legislature regular session of 2008: budgetary and other issues regarding invasive species	THE STATE OF HAWAII DEPARTMENT OF LAND AND NATURAL RESOURCES DIVISION OF FORESTRY AND WILDLIFE		2008	English	Official report	Kraus, F., & Duffy, D. C. (2010). A successful model from Hawaii for rapid response to invasive species. Journal for Nature Conservation, 18(2), 135–141. https://doi.org/10.1016/j.jnc.2009.07.001	Yes	Diverse/Unspecified	Diverse/Unspecified	Diverse/Unspecified	Diverse/Unspecified	Diverse/Unspecified	Diverse/Unspecified	Diverse/Unspecified			Aquatic/Terrestrial	diverse/Unspecified					Oceania/Pacific Islands	USA	Hawaii	Hawaii	Site	2008	Year	2008	Unspecified	2008	2008	Potentially ongoing	312000			355209	355209	312000	355209	355209	USD	2008	Effective	Observed
905	TC	494	Report to the Twenty-fourth Legislature regular session of 2008: budgetary and other issues regarding invasive species	THE STATE OF HAWAII DEPARTMENT OF LAND AND NATURAL RESOURCES DIVISION OF FORESTRY AND WILDLIFE		2008	English	Official report	Kraus, F., & Duffy, D. C. (2010). A successful model from Hawaii for rapid response to invasive species. Journal for Nature Conservation, 18(2), 135–141. https://doi.org/10.1016/j.jnc.2009.07.001	Yes	Diverse/Unspecified	Diverse/Unspecified	Diverse/Unspecified	Diverse/Unspecified	Diverse/Unspecified	Diverse/Unspecified	Diverse/Unspecified			Aquatic/Terrestrial	diverse/Unspecified					Oceania/Pacific Islands	USA	Hawaii	Hawaii	Site	2008	Year	2008	Unspecified	2008	2008	Potentially ongoing	495100			563666	563666	495100	563666	563666	USD	2008	Effective	Observed
907	TC	346	Harmful Non-Indigenous Species in the United States	U.S. Congress, Office of Technology Assessment		1993	English	Official report	Krcmar-Nozic, E., Wilson, B., & Arthur, L. (2000). The potential impacts of exotic forest pests in North America: a synthesis of research. Information Report BC-X-387.	Yes	Animalia	Chordata	Diverse/Unspecified	Diverse/Unspecified	Diverse/Unspecified	Diverse/Unspecified	Diverse/Unspecified		Diverse (terrestrial vertebrates)	Terrestrial	terrestrial					North America	USA		Unspecified	Country	1906-1991	Period	1906	1991	1906	1991	Potentially ongoing	2.27647e+08			4.09722e+08	4.09722e+08	2.64706e+06	4.76421e+06	4.76421e+06	USD	1991	Effective	Observed
908	TC	350	Hearings on Agriculture, Rural Development, Food and Drug Administration, and Related Agencies Appropriations for 1993: Part 4, Serial No. 054-898 0	U.S. Congress, House Committee on Appropriations, Subcommittee on Agriculture, Rural Development, and Related Agencies		1993	English	Official report	OTA. (1993). Harmful Non-Indigenous Species in the United States. Ota-F-565, (September). Retrieved from https://www.anstaskforce.gov/Documents/OTA_Report_1993.pdf	No	Animalia	Arthropoda	Arachnida/Insecta	Diptera/Hemiptera/Hymenoptera/Thysanoptera/Trombidiformes	Aleyrodidae/Apidae/Aphididae/Tarsonemidae/Tephritidae/Thripidae	Acarapis/Apis/Ceratitis/Diuraphis/Taeniothrips	Acarapis woodi/Apis mellifera/Bemisia tabaci/Ceratitis capitata/Diuraphis noxia/Taeniothrips inconsequens	Apis mellifera scutellata	Tracheal mite/African honey bee/Sweet potato whitefly/Russian wheat aphid/Mediterranean fruit fly/Pear thrips	Aquatic/Terrestrial	terrestrial					North America	USA		Unspecified	Country	1993	Year	1993	Unspecified	1993	1993	Potentially ongoing	9500000			1.61198e+07	1.61198e+07	9500000	1.61198e+07	1.61198e+07	USD	1993	Publication year	Potential
909	TC	346	Harmful Non-Indigenous Species in the United States	U.S. Congress, Office of Technology Assessment		1993	English	Official report	NA	No	Animalia/Plantae	Diverse/Unspecified	Diverse/Unspecified	Diverse/Unspecified	Diverse/Unspecified	Diverse/Unspecified	Diverse/Unspecified		Diverse (animals/plants)	Aquatic/Terrestrial	diverse/Unspecified					North America	USA		Unspecified	Country	1992	Year	1992	Unspecified	1992	1992	Potentially ongoing	109581000			191427360	191427360	109581000	191427360	191427360	USD	1992	Effective	Observed
910	TC	349	Hearings on Agriculture, Rural Development and Related Agencies Appropriations for 1992: Part 5, Serial No. 43-194	U.S. Congress, House Committee on Appropriations, Subcommittee on Agriculture, Rural Development, and Related Agencies		1991	English	Official report	OTA. (1993). Harmful Non-Indigenous Species in the United States. Ota-F-565, (September). Retrieved from https://www.anstaskforce.gov/Documents/OTA_Report_1993.pdf	No	Diverse/Unspecified	Diverse/Unspecified	Diverse/Unspecified	Diverse/Unspecified	Diverse/Unspecified	Diverse/Unspecified	Diverse/Unspecified			Aquatic/Terrestrial	diverse/Unspecified					North America	USA		Unspecified	Country	1990-1991	Period	1990	1991	1991	1991	One-time	500000	450000	550000	899907	899907	500000	899907	899907	USD	1991	Effective	Observed
911	TC	152	1990 Inventory of Research Activities in the National Parks	U.S. Department of the Interior, National Park Service		1992	English	Official report	OTA. (1993). Harmful Non-Indigenous Species in the United States. Ota-F-565, (September). Retrieved from https://www.anstaskforce.gov/Documents/OTA_Report_1993.pdf	No	Diverse/Unspecified	Diverse/Unspecified	Diverse/Unspecified	Diverse/Unspecified	Diverse/Unspecified	Diverse/Unspecified	Diverse/Unspecified		All non-indigenous species	Aquatic/Terrestrial	diverse/Unspecified					North America	USA		Unspecified	Country	1990	Year	1990	Unspecified	1990	1990	Potentially ongoing	2000000			3.75207e+06	3.75207e+06	2000000	3.75207e+06	3.75207e+06	USD	1990	Effective	Observed
914	TC	192	APHIS strategic plan 2000-2005	United States Department of Agriculture, Animal and Plant Health Inspection Service [APHIS]		2001	English	Official report	Evans, E. A. (2003). Economic Dimensions of Invasive Species. Choices, 5–10.	No	Animalia/plantae	Diverse/Unspecified	Diverse/Unspecified	Diverse/Unspecified	Diverse/Unspecified	Diverse/Unspecified	Diverse/Unspecified			Aquatic/Terrestrial	diverse/Unspecified					North America	USA		Unspecified	Country	2001	Year	2001	Unspecified	2001	2001	Potentially ongoing	138000000000			191038000000	191038000000	138000000000	191038000000	191038000000	USD	2001	Publication year	Observed
927	TC	381	Invasive Species : The Search for Solutions	Dybas		2004	English	Peer-reviewed article	NA	Yes	Diverse/Unspecified	Diverse/Unspecified	Diverse/Unspecified	Diverse/Unspecified	Diverse/Unspecified	Diverse/Unspecified	Diverse/Unspecified		Invasive species	Aquatic/Terrestrial	diverse/Unspecified					North America	USA		Unspecified	Country	2004	Year	2004	Unspecified	2004	2004	Potentially ongoing	137000000000			177789000000	177789000000	137000000000	177789000000	177789000000	USD	2004	Publication year	Observed
928	TC	333	Fiscal year 2005 interagency invasive species performance-based budget	National Invasive Species Council		2004	English	Official report	Simberloff, D., Parker, I. M., & Windle, P. N. (2005). Introduced species policy, management, and future research needs. Frontiers in Ecology and the Environment, 3(1), 12–20. https://doi.org/10.1890/1540-9295(2005)003[0012:ispmaf]2.0.co;2	No	Diverse/Unspecified	Diverse/Unspecified	Diverse/Unspecified	Diverse/Unspecified	Diverse/Unspecified	Diverse/Unspecified	Diverse/Unspecified			Aquatic/Terrestrial	diverse/Unspecified					North America	USA		Unspecified	Country	2004	Year	2004	Unspecified	2004	2004	Potentially ongoing	649000			842227	842227	649000	842227	842227	USD	2004	Effective	Observed
929	TC	333	Fiscal year 2005 interagency invasive species performance-based budget	National Invasive Species Council		2004	English	Official report	Simberloff, D., Parker, I. M., & Windle, P. N. (2005). Introduced species policy, management, and future research needs. Frontiers in Ecology and the Environment, 3(1), 12–20. https://doi.org/10.1890/1540-9295(2005)003[0012:ispmaf]2.0.co;2	No	Diverse/Unspecified	Diverse/Unspecified	Diverse/Unspecified	Diverse/Unspecified	Diverse/Unspecified	Diverse/Unspecified	Diverse/Unspecified			Aquatic/Terrestrial	diverse/Unspecified					North America	USA		Unspecified	Country	2004	Year	2004	Unspecified	2004	2004	Potentially ongoing	259457000			3.36705e+08	3.36705e+08	259457000	3.36705e+08	3.36705e+08	USD	2004	Effective	Observed
930	TC	333	Fiscal year 2005 interagency invasive species performance-based budget	National Invasive Species Council		2005	English	Official report	Simberloff, D., Parker, I. M., & Windle, P. N. (2005). Introduced species policy, management, and future research needs. Frontiers in Ecology and the Environment, 3(1), 12–20. https://doi.org/10.1890/1540-9295(2005)003[0012:ispmaf]2.0.co;2	No	Diverse/Unspecified	Diverse/Unspecified	Diverse/Unspecified	Diverse/Unspecified	Diverse/Unspecified	Diverse/Unspecified	Diverse/Unspecified			Aquatic/Terrestrial	diverse/Unspecified					North America	USA		Unspecified	Country	2005	Year	2005	Unspecified	2005	2005	Potentially ongoing	353669000			4.43906e+08	4.43906e+08	353669000	4.43906e+08	4.43906e+08	USD	2005	Effective	Observed
931	TC	333	Fiscal year 2005 interagency invasive species performance-based budget	National Invasive Species Council		2004	English	Official report	Simberloff, D., Parker, I. M., & Windle, P. N. (2005). Introduced species policy, management, and future research needs. Frontiers in Ecology and the Environment, 3(1), 12–20. https://doi.org/10.1890/1540-9295(2005)003[0012:ispmaf]2.0.co;2	No	Diverse/Unspecified	Diverse/Unspecified	Diverse/Unspecified	Diverse/Unspecified	Diverse/Unspecified	Diverse/Unspecified	Diverse/Unspecified			Aquatic/Terrestrial	diverse/Unspecified					North America	USA		Unspecified	Country	2004	Year	2004	Unspecified	2004	2004	Potentially ongoing	117430000			1.52392e+08	1.52392e+08	117430000	1.52392e+08	1.52392e+08	USD	2004	Effective	Observed
932	TC	333	Fiscal year 2005 interagency invasive species performance-based budget	National Invasive Species Council		2005	English	Official report	Simberloff, D., Parker, I. M., & Windle, P. N. (2005). Introduced species policy, management, and future research needs. Frontiers in Ecology and the Environment, 3(1), 12–20. https://doi.org/10.1890/1540-9295(2005)003[0012:ispmaf]2.0.co;2	No	Diverse/Unspecified	Diverse/Unspecified	Diverse/Unspecified	Diverse/Unspecified	Diverse/Unspecified	Diverse/Unspecified	Diverse/Unspecified			Aquatic/Terrestrial	diverse/Unspecified					North America	USA		Unspecified	Country	2005	Year	2005	Unspecified	2005	2005	Potentially ongoing	106560000			1.33748e+08	1.33748e+08	106560000	1.33748e+08	1.33748e+08	USD	2005	Effective	Observed
933	TC	385	Invasive species: Federal and selected state funding to address harmful nonnative species, GAO/RCED-00-219	General Accounting Office, US Congress		2000	English	Official report	Simberloff, D., Parker, I. M., & Windle, P. N. (2005). Introduced species policy, management, and future research needs. Frontiers in Ecology and the Environment, 3(1), 12–20. https://doi.org/10.1890/1540-9295(2005)003[0012:ispmaf]2.0.co;2	Yes	Diverse/Unspecified	Diverse/Unspecified	Diverse/Unspecified	Diverse/Unspecified	Diverse/Unspecified	Diverse/Unspecified	Diverse/Unspecified		Diverse (animals/pathogens/plants)	Aquatic/Terrestrial	diverse/Unspecified					North America	USA		Unspecified	Country	1999	Year	1999	Unspecified	1999	1999	Potentially ongoing	94600000			139206439	139206439	94600000	139206439	139206439	USD	1999	Effective	Observed
934	TC	385	Invasive species: Federal and selected state funding to address harmful nonnative species, GAO/RCED-00-219	General Accounting Office, US Congress		2000	English	Official report	Simberloff, D., Parker, I. M., & Windle, P. N. (2005). Introduced species policy, management, and future research needs. Frontiers in Ecology and the Environment, 3(1), 12–20. https://doi.org/10.1890/1540-9295(2005)003[0012:ispmaf]2.0.co;2	Yes	Diverse/Unspecified	Diverse/Unspecified	Diverse/Unspecified	Diverse/Unspecified	Diverse/Unspecified	Diverse/Unspecified	Diverse/Unspecified		Diverse (animals/pathogens/plants)	Aquatic/Terrestrial	diverse/Unspecified					North America	USA		Unspecified	Country	2000	Year	2000	Unspecified	2000	2000	Potentially ongoing	104900000			1.49321e+08	1.49321e+08	104900000	1.49321e+08	1.49321e+08	USD	2000	Effective	Observed
935	TC	385	Invasive species: Federal and selected state funding to address harmful nonnative species, GAO/RCED-00-219	General Accounting Office, US Congress		2000	English	Official report	Simberloff, D., Parker, I. M., & Windle, P. N. (2005). Introduced species policy, management, and future research needs. Frontiers in Ecology and the Environment, 3(1), 12–20. https://doi.org/10.1890/1540-9295(2005)003[0012:ispmaf]2.0.co;2	Yes	Diverse/Unspecified	Diverse/Unspecified	Diverse/Unspecified	Diverse/Unspecified	Diverse/Unspecified	Diverse/Unspecified	Diverse/Unspecified		Diverse (animals/pathogens/plants)	Aquatic/Terrestrial	diverse/Unspecified					North America	USA		Unspecified	Country	1999	Year	1999	Unspecified	1999	1999	Potentially ongoing	262900000			3.86864e+08	3.86864e+08	262900000	3.86864e+08	3.86864e+08	USD	1999	Effective	Observed
936	TC	385	Invasive species: Federal and selected state funding to address harmful nonnative species, GAO/RCED-00-219	General Accounting Office, US Congress		2000	English	Official report	Simberloff, D., Parker, I. M., & Windle, P. N. (2005). Introduced species policy, management, and future research needs. Frontiers in Ecology and the Environment, 3(1), 12–20. https://doi.org/10.1890/1540-9295(2005)003[0012:ispmaf]2.0.co;2	Yes	Diverse/Unspecified	Diverse/Unspecified	Diverse/Unspecified	Diverse/Unspecified	Diverse/Unspecified	Diverse/Unspecified	Diverse/Unspecified		Diverse (animals/pathogens/plants)	Aquatic/Terrestrial	diverse/Unspecified					North America	USA		Unspecified	Country	2000	Year	2000	Unspecified	2000	2000	Potentially ongoing	308500000			4.39137e+08	4.39137e+08	308500000	4.39137e+08	4.39137e+08	USD	2000	Effective	Observed
937	TC	385	Invasive species: Federal and selected state funding to address harmful nonnative species, GAO/RCED-00-219	General Accounting Office, US Congress		2000	English	Official report	Simberloff, D., Parker, I. M., & Windle, P. N. (2005). Introduced species policy, management, and future research needs. Frontiers in Ecology and the Environment, 3(1), 12–20. https://doi.org/10.1890/1540-9295(2005)003[0012:ispmaf]2.0.co;2	Yes	Diverse/Unspecified	Diverse/Unspecified	Diverse/Unspecified	Diverse/Unspecified	Diverse/Unspecified	Diverse/Unspecified	Diverse/Unspecified		Diverse (animals/pathogens/plants)	Aquatic/Terrestrial	diverse/Unspecified					North America	USA		Unspecified	Country	1999	Year	1999	Unspecified	1999	1999	Potentially ongoing	99100000			1.45828e+08	1.45828e+08	99100000	1.45828e+08	1.45828e+08	USD	1999	Effective	Observed
938	TC	385	Invasive species: Federal and selected state funding to address harmful nonnative species, GAO/RCED-00-219	General Accounting Office, US Congress		2000	English	Official report	Simberloff, D., Parker, I. M., & Windle, P. N. (2005). Introduced species policy, management, and future research needs. Frontiers in Ecology and the Environment, 3(1), 12–20. https://doi.org/10.1890/1540-9295(2005)003[0012:ispmaf]2.0.co;2	Yes	Diverse/Unspecified	Diverse/Unspecified	Diverse/Unspecified	Diverse/Unspecified	Diverse/Unspecified	Diverse/Unspecified	Diverse/Unspecified		Diverse (animals/pathogens/plants)	Aquatic/Terrestrial	diverse/Unspecified					North America	USA		Unspecified	Country	2000	Year	2000	Unspecified	2000	2000	Potentially ongoing	143800000			2.04693e+08	2.04693e+08	143800000	2.04693e+08	2.04693e+08	USD	2000	Effective	Observed
939	TC	385	Invasive species: Federal and selected state funding to address harmful nonnative species, GAO/RCED-00-219	General Accounting Office, US Congress		2000	English	Official report	Simberloff, D., Parker, I. M., & Windle, P. N. (2005). Introduced species policy, management, and future research needs. Frontiers in Ecology and the Environment, 3(1), 12–20. https://doi.org/10.1890/1540-9295(2005)003[0012:ispmaf]2.0.co;2	Yes	Diverse/Unspecified	Diverse/Unspecified	Diverse/Unspecified	Diverse/Unspecified	Diverse/Unspecified	Diverse/Unspecified	Diverse/Unspecified		Diverse (animals/pathogens/plants)	Aquatic/Terrestrial	diverse/Unspecified					North America	USA		Unspecified	Country	1999	Year	1999	Unspecified	1999	1999	Potentially ongoing	29200000			4.29686e+07	4.29686e+07	29200000	4.29686e+07	4.29686e+07	USD	1999	Effective	Observed
940	TC	385	Invasive species: Federal and selected state funding to address harmful nonnative species, GAO/RCED-00-219	General Accounting Office, US Congress		2000	English	Official report	Simberloff, D., Parker, I. M., & Windle, P. N. (2005). Introduced species policy, management, and future research needs. Frontiers in Ecology and the Environment, 3(1), 12–20. https://doi.org/10.1890/1540-9295(2005)003[0012:ispmaf]2.0.co;2	Yes	Diverse/Unspecified	Diverse/Unspecified	Diverse/Unspecified	Diverse/Unspecified	Diverse/Unspecified	Diverse/Unspecified	Diverse/Unspecified		Diverse (animals/pathogens/plants)	Aquatic/Terrestrial	diverse/Unspecified					North America	USA		Unspecified	Country	2000	Year	2000	Unspecified	2000	2000	Potentially ongoing	39900000			5.6796e+07	5.6796e+07	39900000	5.6796e+07	5.6796e+07	USD	2000	Effective	Observed
941	TC	385	Invasive species: Federal and selected state funding to address harmful nonnative species, GAO/RCED-00-219	General Accounting Office, US Congress		2000	English	Official report	Simberloff, D., Parker, I. M., & Windle, P. N. (2005). Introduced species policy, management, and future research needs. Frontiers in Ecology and the Environment, 3(1), 12–20. https://doi.org/10.1890/1540-9295(2005)003[0012:ispmaf]2.0.co;2	Yes	Diverse/Unspecified	Diverse/Unspecified	Diverse/Unspecified	Diverse/Unspecified	Diverse/Unspecified	Diverse/Unspecified	Diverse/Unspecified		Diverse (animals/pathogens/plants)	Aquatic/Terrestrial	diverse/Unspecified					North America	USA		Unspecified	Country	1999	Year	1999	Unspecified	1999	1999	Potentially ongoing	9600000			1.41267e+07	1.41267e+07	9600000	1.41267e+07	1.41267e+07	USD	1999	Effective	Observed
942	TC	385	Invasive species: Federal and selected state funding to address harmful nonnative species, GAO/RCED-00-219	General Accounting Office, US Congress		2000	English	Official report	Simberloff, D., Parker, I. M., & Windle, P. N. (2005). Introduced species policy, management, and future research needs. Frontiers in Ecology and the Environment, 3(1), 12–20. https://doi.org/10.1890/1540-9295(2005)003[0012:ispmaf]2.0.co;2	Yes	Diverse/Unspecified	Diverse/Unspecified	Diverse/Unspecified	Diverse/Unspecified	Diverse/Unspecified	Diverse/Unspecified	Diverse/Unspecified		Diverse (animals/pathogens/plants)	Aquatic/Terrestrial	diverse/Unspecified					North America	USA		Unspecified	Country	2000	Year	2000	Unspecified	2000	2000	Potentially ongoing	11800000			1.67968e+07	1.67968e+07	11800000	1.67968e+07	1.67968e+07	USD	2000	Effective	Observed
943	TC	385	Invasive species: Federal and selected state funding to address harmful nonnative species, GAO/RCED-00-219	General Accounting Office, US Congress		2000	English	Official report	Simberloff, D., Parker, I. M., & Windle, P. N. (2005). Introduced species policy, management, and future research needs. Frontiers in Ecology and the Environment, 3(1), 12–20. https://doi.org/10.1890/1540-9295(2005)003[0012:ispmaf]2.0.co;2	Yes	Diverse/Unspecified	Diverse/Unspecified	Diverse/Unspecified	Diverse/Unspecified	Diverse/Unspecified	Diverse/Unspecified	Diverse/Unspecified		Diverse (animals/pathogens/plants)	Aquatic/Terrestrial	diverse/Unspecified					North America	USA		Unspecified	Country	1999	Year	1999	Unspecified	1999	1999	Potentially ongoing	8400000			1.23608e+07	1.23608e+07	8400000	1.23608e+07	1.23608e+07	USD	1999	Effective	Observed
944	TC	385	Invasive species: Federal and selected state funding to address harmful nonnative species, GAO/RCED-00-219	General Accounting Office, US Congress		2000	English	Official report	Simberloff, D., Parker, I. M., & Windle, P. N. (2005). Introduced species policy, management, and future research needs. Frontiers in Ecology and the Environment, 3(1), 12–20. https://doi.org/10.1890/1540-9295(2005)003[0012:ispmaf]2.0.co;2	Yes	Diverse/Unspecified	Diverse/Unspecified	Diverse/Unspecified	Diverse/Unspecified	Diverse/Unspecified	Diverse/Unspecified	Diverse/Unspecified		Diverse (animals/pathogens/plants)	Aquatic/Terrestrial	diverse/Unspecified					North America	USA		Unspecified	Country	2000	Year	2000	Unspecified	2000	2000	Potentially ongoing	9900000			1.40922e+07	1.40922e+07	9900000	1.40922e+07	1.40922e+07	USD	2000	Effective	Observed
945	TC	385	Invasive species: Federal and selected state funding to address harmful nonnative species, GAO/RCED-00-219	General Accounting Office, US Congress		2000	English	Official report	Simberloff, D., Parker, I. M., & Windle, P. N. (2005). Introduced species policy, management, and future research needs. Frontiers in Ecology and the Environment, 3(1), 12–20. https://doi.org/10.1890/1540-9295(2005)003[0012:ispmaf]2.0.co;2	Yes	Diverse/Unspecified	Diverse/Unspecified	Diverse/Unspecified	Diverse/Unspecified	Diverse/Unspecified	Diverse/Unspecified	Diverse/Unspecified		Diverse (animals/pathogens/plants)	Aquatic/Terrestrial	diverse/Unspecified					North America	USA		Unspecified	Country	1999	Year	1999	Unspecified	1999	1999	Potentially ongoing	3700000			5.44465e+06	5.44465e+06	3700000	5.44465e+06	5.44465e+06	USD	1999	Effective	Observed
946	TC	385	Invasive species: Federal and selected state funding to address harmful nonnative species, GAO/RCED-00-219	General Accounting Office, US Congress		2000	English	Official report	Simberloff, D., Parker, I. M., & Windle, P. N. (2005). Introduced species policy, management, and future research needs. Frontiers in Ecology and the Environment, 3(1), 12–20. https://doi.org/10.1890/1540-9295(2005)003[0012:ispmaf]2.0.co;2	Yes	Diverse/Unspecified	Diverse/Unspecified	Diverse/Unspecified	Diverse/Unspecified	Diverse/Unspecified	Diverse/Unspecified	Diverse/Unspecified		Diverse (animals/pathogens/plants)	Aquatic/Terrestrial	diverse/Unspecified					North America	USA		Unspecified	Country	2000	Year	2000	Unspecified	2000	2000	Potentially ongoing	4700000			6.69026e+06	6.69026e+06	4700000	6.69026e+06	6.69026e+06	USD	2000	Effective	Observed
947	TC	385	Invasive species: Federal and selected state funding to address harmful nonnative species, GAO/RCED-00-219	General Accounting Office, US Congress		2000	English	Official report	Simberloff, D., Parker, I. M., & Windle, P. N. (2005). Introduced species policy, management, and future research needs. Frontiers in Ecology and the Environment, 3(1), 12–20. https://doi.org/10.1890/1540-9295(2005)003[0012:ispmaf]2.0.co;2	Yes	Diverse/Unspecified	Diverse/Unspecified	Diverse/Unspecified	Diverse/Unspecified	Diverse/Unspecified	Diverse/Unspecified	Diverse/Unspecified		Diverse (animals/pathogens/plants)	Aquatic/Terrestrial	diverse/Unspecified					North America	USA		Unspecified	Country	1999	Year	1999	Unspecified	1999	1999	Potentially ongoing	3400000			5.00319e+06	5.00319e+06	3400000	5.00319e+06	5.00319e+06	USD	1999	Effective	Observed
948	TC	385	Invasive species: Federal and selected state funding to address harmful nonnative species, GAO/RCED-00-219	General Accounting Office, US Congress		2000	English	Official report	Simberloff, D., Parker, I. M., & Windle, P. N. (2005). Introduced species policy, management, and future research needs. Frontiers in Ecology and the Environment, 3(1), 12–20. https://doi.org/10.1890/1540-9295(2005)003[0012:ispmaf]2.0.co;2	Yes	Diverse/Unspecified	Diverse/Unspecified	Diverse/Unspecified	Diverse/Unspecified	Diverse/Unspecified	Diverse/Unspecified	Diverse/Unspecified		Diverse (animals/pathogens/plants)	Aquatic/Terrestrial	diverse/Unspecified					North America	USA		Unspecified	Country	1999	Year	1999	Unspecified	1999	1999	Potentially ongoing	2900000			4.26743e+06	4.26743e+06	2900000	4.26743e+06	4.26743e+06	USD	1999	Effective	Observed
958	GS	306	Invasive alien species: a growing but neglected threat?	Brunel et al		2013	English	Book chapter	NA	Yes	Diverse/Unspecified	Diverse/Unspecified	Diverse/Unspecified	Diverse/Unspecified	Diverse/Unspecified	Diverse/Unspecified	Diverse/Unspecified			Aquatic/Terrestrial	diverse/Unspecified					North America	USA		Unspecified	Country	Unspecified	Year	Unspecified	Unspecified	2013	2013	Potentially ongoing	138000000000			145205000000	145205000000	138000000000	145205000000	145205000000	USD	2013	Publication year	Observed
961	GS	305	Impacts of Introduced Species in the United States	Simberloff		1996	English	Peer-reviewed article	NA	Yes	Diverse/Unspecified	Diverse/Unspecified	Diverse/Unspecified	Diverse/Unspecified	Diverse/Unspecified	Diverse/Unspecified	Diverse/Unspecified			Aquatic/Terrestrial	diverse/Unspecified					North America	USA		Unspecified	Country	Unspecified	Year	Unspecified	Unspecified	1996	1996	Potentially ongoing	180000000			2.81298e+08	2.81298e+08	180000000	2.81298e+08	2.81298e+08	USD	1996	Publication year	Potential
971	GS	161	Invasive Species, Agriculture and Trade : Case Studies from the NAFTA Context	Perrault et al		2003	English	Conference proceedings	NA	Yes	Diverse/Unspecified	Diverse/Unspecified	Diverse/Unspecified	Diverse/Unspecified	Diverse/Unspecified	Diverse/Unspecified	Diverse/Unspecified		Diverse (animals/pathogens/plants)	Aquatic/Terrestrial	diverse/Unspecified					North America	Canada		Unspecified	Country	2003	Year	2003	Unspecified	2003	2003	Potentially ongoing	7500000000			7132892123	8149651089	7500000000	7132892123	8149651089	CAD	2003	Publication year	Observed
976	GS	197	Managing Invasive Species : How Much Do We Spend?	Schwörer et al		2012	English	Official report	NA	Yes	Diverse/Unspecified	Diverse/Unspecified	Diverse/Unspecified	Diverse/Unspecified	Diverse/Unspecified	Diverse/Unspecified	Diverse/Unspecified		Diverse (animals/pathogens/plants)	Aquatic/Terrestrial	diverse/Unspecified					North America	USA		Alaska	Site	2007-2011	Year	2007	2011	2007	2011	One-time	1200000			1307658	1307658	1200000	1307658	1307658	USD	2011	Effective	Observed
977	GS	197	Managing Invasive Species : How Much Do We Spend?	Schwörer et al		2012	English	Official report	NA	Yes	Diverse/Unspecified	Diverse/Unspecified	Diverse/Unspecified	Diverse/Unspecified	Diverse/Unspecified	Diverse/Unspecified	Diverse/Unspecified		Diverse (animals/pathogens/plants)	Aquatic/Terrestrial	diverse/Unspecified					North America	USA		Alaska	Site	2007-2011	Year	2007	2011	2007	2011	One-time	468000			509987	509987	468000	509987	509987	USD	2011	Effective	Observed
978	GS	197	Managing Invasive Species : How Much Do We Spend?	Schwörer et al		2012	English	Official report	NA	Yes	Diverse/Unspecified	Diverse/Unspecified	Diverse/Unspecified	Diverse/Unspecified	Diverse/Unspecified	Diverse/Unspecified	Diverse/Unspecified		Diverse (animals/pathogens/plants)	Aquatic/Terrestrial	diverse/Unspecified					North America	USA		Alaska	Site	2007-2011	Year	2007	2011	2007	2011	One-time	139000			151470	151470	139000	151470	151470	USD	2011	Effective	Observed
979	GS	197	Managing Invasive Species : How Much Do We Spend?	Schwörer et al		2012	English	Official report	NA	Yes	Diverse/Unspecified	Diverse/Unspecified	Diverse/Unspecified	Diverse/Unspecified	Diverse/Unspecified	Diverse/Unspecified	Diverse/Unspecified		Diverse (animals/pathogens/plants)	Aquatic/Terrestrial	diverse/Unspecified					North America	USA		Alaska	Site	2007-2011	Year	2007	2011	2007	2011	One-time	1380000			1.50381e+06	1.50381e+06	1380000	1.50381e+06	1.50381e+06	USD	2011	Effective	Observed
980	GS	197	Managing Invasive Species : How Much Do We Spend?	Schwörer et al		2012	English	Official report	NA	Yes	Diverse/Unspecified	Diverse/Unspecified	Diverse/Unspecified	Diverse/Unspecified	Diverse/Unspecified	Diverse/Unspecified	Diverse/Unspecified		Diverse (animals/pathogens/plants)	Aquatic/Terrestrial	diverse/Unspecified					North America	USA		Alaska	Site	2007-2011	Year	2007	2011	2007	2011	One-time	500000			544858	544858	500000	544858	544858	USD	2011	Effective	Observed
981	GS	197	Managing Invasive Species : How Much Do We Spend?	Schwörer et al		2012	English	Official report	NA	Yes	Diverse/Unspecified	Diverse/Unspecified	Diverse/Unspecified	Diverse/Unspecified	Diverse/Unspecified	Diverse/Unspecified	Diverse/Unspecified		Diverse (animals/pathogens/plants)	Aquatic/Terrestrial	diverse/Unspecified					North America	USA		Alaska	Site	2007-2011	Year	2007	2011	2007	2011	One-time	289000			314928	314928	289000	314928	314928	USD	2011	Effective	Observed
985	GS	218	Paying for protection from invasive species	Jenkins		2002	English	Peer-reviewed article	NA	Yes	Diverse/Unspecified	Diverse/Unspecified	Diverse/Unspecified	Diverse/Unspecified	Diverse/Unspecified	Diverse/Unspecified	Diverse/Unspecified		Diverse (animals/pathogens/plants)	Aquatic/Terrestrial	diverse/Unspecified					North America	USA		Unspecified	Country	Unspecified	Year	Unspecified	Unspecified	2002	2002	One-time	200000000			2.72544e+08	2.72544e+08	200000000	2.72544e+08	2.72544e+08	USD	2002	Publication year	Potential
986	GS	218	Paying for protection from invasive species	Jenkins		2002	English	Peer-reviewed article	NA	Yes	Diverse/Unspecified	Diverse/Unspecified	Diverse/Unspecified	Diverse/Unspecified	Diverse/Unspecified	Diverse/Unspecified	Diverse/Unspecified		Diverse (animals/pathogens/plants)	Aquatic/Terrestrial	diverse/Unspecified					North America	USA		Unspecified	Country	2000	Year	2000	Unspecified	2000	2000	Potentially ongoing	631500000			8.98914e+08	8.98914e+08	631500000	8.98914e+08	8.98914e+08	USD	2000	Effective	Observed
988	GS	240	Risk assessment for invasive species	Andersen et al		2004	English	Peer-reviewed article	NA	Yes	Diverse/Unspecified	Diverse/Unspecified	Diverse/Unspecified	Diverse/Unspecified	Diverse/Unspecified	Diverse/Unspecified	Diverse/Unspecified		Diverse (animals/pathogens/plants)	Aquatic/Terrestrial	diverse/Unspecified					North America	USA		Unspecified	Country	2001	Year	2001	Unspecified	2001	2001	Potentially ongoing	580000000			8.02914e+08	8.02914e+08	580000000	8.02914e+08	8.02914e+08	USD	2001	Effective	Observed
990	TC	338	Foreword. Special Issue on Invasive Species	Lynch and Liehtenberg		2006	English	Peer-reviewed article	NA	Yes	Diverse/Unspecified	Diverse/Unspecified	Diverse/Unspecified	Diverse/Unspecified	Diverse/Unspecified	Diverse/Unspecified	Diverse/Unspecified		Diverse (animals/pathogens/plants)	Aquatic/Terrestrial	diverse/Unspecified					North America	USA		Unspecified	Country	1990s	Year	1990	1999	1990	1999	One-time	121200000	10400000	232000000	1.4737e+08	1.4737e+08	121200000	1.4737e+08	1.4737e+08	USD	2006	Publication year	Observed
996	TC	357	http://www.usda.gov/agency/obpa/Budget-Summary/2000/text.html	United States Department of Agriculture		2002	English	Web page	Mumford, J. D. (2002). Economic issues related to quarantine in international trade. European Review of Agriculture Economics, 29(3), 329–348. https://doi.org/10.1093/eurrag/29.3.328	No	Diverse/Unspecified	Diverse/Unspecified	Diverse/Unspecified	Diverse/Unspecified	Diverse/Unspecified	Diverse/Unspecified	Diverse/Unspecified			Aquatic/Terrestrial	diverse/Unspecified					North America	USA		Unspecified	Country	1999	Year	1999	Unspecified	1999	1999	Potentially ongoing	590000000			8.04006e+08	8.04006e+08	590000000	8.04006e+08	8.04006e+08	USD	2002	Publication year	Observed
1003	TC	172	Alien species: A slow motion explosion	Environmental News Network (ENN News).		2000	English	Web page	Dalsimer, A. (2002). Why DOD is interested in invasive species. Federal Facilities Environmental Journal, 13(3), 41–54. https://doi.org/10.1002/ffej.10044	Yes	Diverse/Unspecified	Diverse/Unspecified	Diverse/Unspecified	Diverse/Unspecified	Diverse/Unspecified	Diverse/Unspecified	Diverse/Unspecified			Aquatic/Terrestrial	diverse/Unspecified					North America	USA		Unspecified	Country	1999	Year	1999	Unspecified	1999	1999	Potentially ongoing	123000000000			175085000000	175085000000	123000000000	175085000000	175085000000	USD	2000	Publication year	Observed
1005	GS	296	Why DOD is interested in invasive species	Dalsimer		2002	English	Peer-reviewed article	NA	Yes	Diverse/Unspecified	Diverse/Unspecified	Diverse/Unspecified	Diverse/Unspecified	Diverse/Unspecified	Diverse/Unspecified	Diverse/Unspecified		Diverse (animals/pathogens/plants)	Aquatic/Terrestrial	diverse/Unspecified					North America	USA		Unspecified	Country	2001	Year	2001	Unspecified	2001	2001	Potentially ongoing	969000			1.34142e+06	1.34142e+06	969000	1.34142e+06	1.34142e+06	USD	2001	Effective	Observed
1006	GS	296	Why DOD is interested in invasive species	Dalsimer		2002	English	Peer-reviewed article	NA	Yes	Diverse/Unspecified	Diverse/Unspecified	Diverse/Unspecified	Diverse/Unspecified	Diverse/Unspecified	Diverse/Unspecified	Diverse/Unspecified		Diverse (animals/pathogens/plants)	Aquatic/Terrestrial	diverse/Unspecified					North America	USA		Unspecified	Country	2002	Year	2002	Unspecified	2002	2002	Potentially ongoing	2200000			2.99799e+06	2.99799e+06	2200000	2.99799e+06	2.99799e+06	USD	2002	Effective	Observed
1007	GS	296	Why DOD is interested in invasive species	Dalsimer		2002	English	Peer-reviewed article	NA	Yes	Diverse/Unspecified	Diverse/Unspecified	Diverse/Unspecified	Diverse/Unspecified	Diverse/Unspecified	Diverse/Unspecified	Diverse/Unspecified		Diverse (animals/pathogens/plants)	Aquatic/Terrestrial	diverse/Unspecified					North America	USA		Unspecified	Country	1991-2002	Period	1991	2002	1991	2002	One-time	8840000			1.20465e+07	1.20465e+07	736667	1.00387e+06	1.00387e+06	USD	2002	Publication year	Observed
1008	GS	100	Filling the Gaps in the Fight Against Invasive Species	Ikuma et al		2002	English	Official report	NA	Yes	Diverse/Unspecified	Diverse/Unspecified	Diverse/Unspecified	Diverse/Unspecified	Diverse/Unspecified	Diverse/Unspecified	Diverse/Unspecified		Diverse (animals/pathogens/plants)	Aquatic/Terrestrial	diverse/Unspecified					North America	USA		Unspecified	Country	2000	Period	Unspecified	2000	2000	2000	Potentially ongoing	72700000000			99069874681	99069874681	72700000000	99069874681	99069874681	USD	2002	Publication year	Observed
1009	GS	100	Filling the Gaps in the Fight Against Invasive Species	Ikuma et al		2002	English	Official report	NA	Yes	Diverse/Unspecified	Diverse/Unspecified	Diverse/Unspecified	Diverse/Unspecified	Diverse/Unspecified	Diverse/Unspecified	Diverse/Unspecified		Diverse (animals/pathogens/plants)	Aquatic/Terrestrial	diverse/Unspecified					North America	USA		Unspecified	Country	2002	Year	2002	2002	2002	2002	One-time	9260000			1.26188e+07	1.26188e+07	9260000	1.26188e+07	1.26188e+07	USD	2002	Publication year	Observed
1010	GS	100	Filling the Gaps in the Fight Against Invasive Species	Ikuma et al		2002	English	Official report	NA	Yes	Diverse/Unspecified	Diverse/Unspecified	Diverse/Unspecified	Diverse/Unspecified	Diverse/Unspecified	Diverse/Unspecified	Diverse/Unspecified		Diverse (animals/pathogens/plants)	Aquatic/Terrestrial	diverse/Unspecified					North America	USA		Unspecified	Country	2002	Year	2002	2002	2002	2002	One-time	2129000			2.90123e+06	2.90123e+06	2129000	2.90123e+06	2.90123e+06	USD	2002	Publication year	Observed
1011	GS	100	Filling the Gaps in the Fight Against Invasive Species	Ikuma et al		2002	English	Official report	NA	Yes	Diverse/Unspecified	Diverse/Unspecified	Diverse/Unspecified	Diverse/Unspecified	Diverse/Unspecified	Diverse/Unspecified	Diverse/Unspecified		Diverse (animals/pathogens/plants)	Aquatic/Terrestrial	diverse/Unspecified					North America	USA		Unspecified	Country	2002	Year	2002	2002	2002	2002	One-time	4534000			6.17858e+06	6.17858e+06	4534000	6.17858e+06	6.17858e+06	USD	2002	Publication year	Observed
1012	GS	100	Filling the Gaps in the Fight Against Invasive Species	Ikuma et al		2002	English	Official report	NA	Yes	Diverse/Unspecified	Diverse/Unspecified	Diverse/Unspecified	Diverse/Unspecified	Diverse/Unspecified	Diverse/Unspecified	Diverse/Unspecified		Diverse (animals/pathogens/plants)	Aquatic/Terrestrial	diverse/Unspecified					North America	USA		Unspecified	Country	2002	Year	2002	2002	2002	2002	One-time	30252000			4.12251e+07	4.12251e+07	30252000	4.12251e+07	4.12251e+07	USD	2002	Publication year	Observed
1013	GS	100	Filling the Gaps in the Fight Against Invasive Species	Ikuma et al		2002	English	Official report	NA	Yes	Diverse/Unspecified	Diverse/Unspecified	Diverse/Unspecified	Diverse/Unspecified	Diverse/Unspecified	Diverse/Unspecified	Diverse/Unspecified		Diverse (animals/pathogens/plants)	Aquatic/Terrestrial	diverse/Unspecified					North America	USA		Unspecified	Country	2002	Year	2002	2002	2002	2002	One-time	500000			681361	681361	500000	681361	681361	USD	2002	Publication year	Observed
1014	GS	100	Filling the Gaps in the Fight Against Invasive Species	Ikuma et al		2002	English	Official report	NA	Yes	Diverse/Unspecified	Diverse/Unspecified	Diverse/Unspecified	Diverse/Unspecified	Diverse/Unspecified	Diverse/Unspecified	Diverse/Unspecified		Diverse (animals/pathogens/plants)	Aquatic/Terrestrial	diverse/Unspecified					North America	USA		Unspecified	Country	2002	Year	2002	2002	2002	2002	One-time	3172000			4.32255e+06	4.32255e+06	3172000	4.32255e+06	4.32255e+06	USD	2002	Publication year	Observed
1021	TC	547	The Alien Pest Species Invasion in Hawaii: Background Study and Recommendations for Interagency Planning	Nature Conservancy of Hawaii and the Natural Resources Defense Council		1992	English	Official report	OTA. (1993). Harmful Non-Indigenous Species in the United States. Ota-F-565, (September). Retrieved from https://www.anstaskforce.gov/Documents/OTA_Report_1993.pdf	Yes	Diverse/Unspecified	Diverse/Unspecified	Diverse/Unspecified	Diverse/Unspecified	Diverse/Unspecified	Diverse/Unspecified	Diverse/Unspecified			Aquatic/Terrestrial	diverse/Unspecified					Oceania/Pacific Islands	USA	Hawaii	Hawaii (Haleakala National Park/Hawaii Volcanoes National Park)	Unit (Park)	1991	Year	1991	Unspecified	1991	1991	Potentially ongoing	1170900			2.1074e+06	2.1074e+06	1170900	2.1074e+06	2.1074e+06	USD	1991	Effective	Observed
1022	TC	547	The Alien Pest Species Invasion in Hawaii: Background Study and Recommendations for Interagency Planning	Nature Conservancy of Hawaii and the Natural Resources Defense Council		1992	English	Official report	OTA. (1993). Harmful Non-Indigenous Species in the United States. Ota-F-565, (September). Retrieved from https://www.anstaskforce.gov/Documents/OTA_Report_1993.pdf	Yes	Diverse/Unspecified	Diverse/Unspecified	Diverse/Unspecified	Diverse/Unspecified	Diverse/Unspecified	Diverse/Unspecified	Diverse/Unspecified			Aquatic/Terrestrial	diverse/Unspecified					Oceania/Pacific Islands	USA	Hawaii	Hawaii	Site	1991	Year	1991	Unspecified	1991	1991	Potentially ongoing	2.8116e+06			5.06036e+06	5.06036e+06	2.8116e+06	5.06036e+06	5.06036e+06	USD	1991	Effective	Observed
1023	TC	547	The Alien Pest Species Invasion in Hawaii: Background Study and Recommendations for Interagency Planning	Nature Conservancy of Hawaii and the Natural Resources Defense Council		1992	English	Official report	OTA. (1993). Harmful Non-Indigenous Species in the United States. Ota-F-565, (September). Retrieved from https://www.anstaskforce.gov/Documents/OTA_Report_1993.pdf	Yes	Animalia	Diverse/Unspecified	Diverse/Unspecified	Diverse/Unspecified	Diverse/Unspecified	Diverse/Unspecified	Diverse/Unspecified		Agricultural pests	Aquatic/Terrestrial	diverse/Unspecified					Oceania/Pacific Islands	USA	Hawaii	Hawaii	Site	1987-1990	Period	1987	1990	1987	1990	One-time	3831981			7.57699e+06	7.57699e+06	957995	1.89425e+06	1.89425e+06	USD	1989	Effective	Observed
1024	TC	407	Managing the Invasions of Alien Ungulates and Plants in Hawaii’s Natural Areas	Stone and HoIt		1990	English	Official report	OTA. (1993). Harmful Non-Indigenous Species in the United States. Ota-F-565, (September). Retrieved from https://www.anstaskforce.gov/Documents/OTA_Report_1993.pdf	No	Animalia/Plantae	Chordata/Diverse	Diverse/Unspecified	Diverse/Unspecified	Diverse/Unspecified	Diverse/Unspecified	Diverse/Unspecified		Diverse (alien ungulates/plants)	Terrestrial	terrestrial					Oceania/Pacific Islands	USA	Hawaii	Hawaii (Haleakala National Park/Hawaii Volcanoes National Park)	Unit (Park)	1987	Year	1987	Unspecified	1987	1987	Potentially ongoing	1800000			3.88308e+06	3.88308e+06	1800000	3.88308e+06	3.88308e+06	USD	1987	Effective	Observed
1025	TC	189	Annual Report, FY 1989	U.S. Department of Agriculture, Animal and Plant Health Inspection Service, Animal Damage Control, Honolulu, HI		1989	English	Official report	OTA. (1993). Harmful Non-Indigenous Species in the United States. Ota-F-565, (September). Retrieved from https://www.anstaskforce.gov/Documents/OTA_Report_1993.pdf	No	Diverse/Unspecified	Diverse/Unspecified	Diverse/Unspecified	Diverse/Unspecified	Diverse/Unspecified	Diverse/Unspecified	Diverse/Unspecified			Terrestrial	terrestrial					Oceania/Pacific Islands	USA	Hawaii	Hawaii	Site	1989	Year	1989	1989	1989	1989	One-time	181000			357892	357892	181000	357892	357892	USD	1989	Effective	Observed
1026	TC	189	Annual Report, FY 1989	U.S. Department of Agriculture, Animal and Plant Health Inspection Service, Animal Damage Control, Honolulu, HI		1989	English	Official report	OTA. (1993). Harmful Non-Indigenous Species in the United States. Ota-F-565, (September). Retrieved from https://www.anstaskforce.gov/Documents/OTA_Report_1993.pdf	No	Diverse/Unspecified	Diverse/Unspecified	Diverse/Unspecified	Diverse/Unspecified	Diverse/Unspecified	Diverse/Unspecified	Diverse/Unspecified			Terrestrial	terrestrial					Oceania/Pacific Islands	USA	Hawaii	Hawaii	Site	1989	Year	1989	1989	1989	1989	Potentially ongoing	6900000			1.36434e+07	1.36434e+07	6900000	1.36434e+07	1.36434e+07	USD	1989	Effective	Observed
1028	WoS	9946	Invasive Species and Endogenous Risk	Finnoff et al		2010	English	Peer-reviewed article	NA	Yes	Diverse/Unspecified	Diverse/Unspecified	Diverse/Unspecified	Diverse/Unspecified	Diverse/Unspecified	Diverse/Unspecified	Diverse/Unspecified			Aquatic/Terrestrial	diverse/Unspecified					North America	USA		Unspecified	Country	2010	Year	2010	Unspecified	2010	2010	Potentially ongoing	396000000			4.4515e+08	4.4515e+08	396000000	4.4515e+08	4.4515e+08	USD	2010	Publication year	Observed
1029	TC	334	Fiscal year 2006 interagency invasive species performance-based crosscut budget	National Invasive Species Council		2006	English	Official report	Mehta, S. V., Haight, R. G., Homans, F. R., Polasky, S., & Venette, R. C. (2007). Optimal detection and control strategies for invasive species management. Ecological Economics, 61(2–3), 237–245. https://doi.org/10.1016/j.ecolecon.2006.10.024	Yes	Diverse/Unspecified	Diverse/Unspecified	Diverse/Unspecified	Diverse/Unspecified	Diverse/Unspecified	Diverse/Unspecified	Diverse/Unspecified			Aquatic/Terrestrial	diverse/Unspecified					North America	USA		Unspecified	Country	2006	Year	2006	Unspecified	2006	2006	Potentially ongoing	1255304000			1526350759	1526350759	1255304000	1526350759	1526350759	USD	2006	Effective	Potential
1032	WoS	6960	Invasive animals and wildlife pathogens in the United States: The economic case for more risk assessments and regulation	Jenkins et al		2013	English	Peer-reviewed article	NA	Yes	Animalia	Diverse/Unspecified	Diverse/Unspecified	Diverse/Unspecified	Diverse/Unspecified	Diverse/Unspecified	Diverse/Unspecified		Diverse (animals)	Aquatic/Terrestrial	diverse/Unspecified					North America	USA		Unspecified	Country	2013	Year	2013	Unspecified	2013	2013	Potentially ongoing	500000			526105	526105	500000	526105	526105	USD	2013	Publication year	Observed
1036	WoS	6960	Invasive animals and wildlife pathogens in the United States: The economic case for more risk assessments and regulation	Jenkins et al		2013	English	Peer-reviewed article	NA	Yes	Animalia	Diverse/Unspecified	Diverse/Unspecified	Diverse/Unspecified	Diverse/Unspecified	Diverse/Unspecified	Diverse/Unspecified		Diverse (animals)	Aquatic/Terrestrial	diverse/Unspecified					North America	USA		Florida	Site	Unspecified	Year	Unspecified	Unspecified	2013	2013	One-time	12200			12837	12837	12200	12837	12837	USD	2013	Publication year	Observed
1037	TC	345	Harmful animal invaders—the economic realities	National Environmental Coalition on Invasive Species		2013	English	Fact sheet	Jenkins, P. T. (2013). Invasive animals and wildlife pathogens in the United States: The economic case for more risk assessments and regulation. Biological Invasions, 15(2), 243–248. https://doi.org/10.1007/s10530-012-0296-8	Yes	Diverse/Unspecified	Diverse/Unspecified	Diverse/Unspecified	Diverse/Unspecified	Diverse/Unspecified	Diverse/Unspecified	Diverse/Unspecified			Aquatic/Terrestrial	diverse/Unspecified					North America	USA		Unspecified	Country	Unspecified	Year	Unspecified	Unspecified	2013	2013	Potentially ongoing	2500000	2000000	3000000	2.63052e+06	2.63052e+06	2500000	2.63052e+06	2.63052e+06	USD	2013	Publication year	Potential
1038	TC	468	Plant Quarantine: Preventing the introduction and spread of alien species harmful to plants	Dawson		2002	English	Official report	Shine, C., Kettunen, M., Genovesi, P., Essl, F., Gollasch, S., Rabitsch, W., … Brink, P. (2010). Assessment to support continued development of the EU Strategy to combat invasive alien species, Final Report for the European Commission. Brussels, Belgium.	No	Animalia	Arthropoda	Insecta	Diverse/Unspecified	Diverse/Unspecified	Diverse/Unspecified	Diverse/Unspecified			Terrestrial	terrestrial					North America	Canada		Unspecified	Country	2002	Year	2002	Unspecified	2002	2002	Potentially ongoing	2750000000			2387969900	3048388796	2750000000	2387969900	3048388796	CAD	2002	Publication year	Observed
1069	TC	289	Environmental and economic costs of alien invasive species in Canada	RNT Consulting		2002	English	Conference proceedings	Nantel, P. (2002). Afterword: Predictive Ecology for a Proactive Approach to Alien Invaders. In Claudi, R., Nantel, P., Muckle-Jeffs, E. (eds.) Alien Invaders in Canada's Waters, Wetlands, and Forests.	No	Diverse/Unspecified	Diverse/Unspecified	Diverse/Unspecified	Diverse/Unspecified	Diverse/Unspecified	Diverse/Unspecified	Diverse/Unspecified			Aquatic/Terrestrial	diverse/Unspecified					North America	Canada		Unspecified	Country	2002	Year	2002	Unspecified	2002	2002	Potentially ongoing	456000000			395968827	5.05478e+08	456000000	395968827	5.05478e+08	CAD	2002	Publication year	Observed
1075	Go	90	The Actual and Potential Economic Impact of Invasive Species on the Adirondack Park : A Preliminary Assessment	Yellow Wood Associates Inc.		2014	English	Official report	NA	Yes	Diverse/Unspecified	Diverse/Unspecified	Diverse/Unspecified	Diverse/Unspecified	Diverse/Unspecified	Diverse/Unspecified	Diverse/Unspecified			Aquatic/Terrestrial	diverse/Unspecified				Y	North America	USA		New York (Adirondacks)	Site	2013	Year	2013	Unspecified	2013	2013	Potentially ongoing	3560000			3.74586e+06	3.74586e+06	3560000	3.74586e+06	3.74586e+06	USD	2013	Effective	Observed
1076	Go	90	The Actual and Potential Economic Impact of Invasive Species on the Adirondack Park : A Preliminary Assessment	Yellow Wood Associates Inc.		2014	English	Official report	NA	Yes	Diverse/Unspecified	Diverse/Unspecified	Diverse/Unspecified	Diverse/Unspecified	Diverse/Unspecified	Diverse/Unspecified	Diverse/Unspecified			Aquatic/Terrestrial	diverse/Unspecified				Y	North America	USA		New York (Adirondacks)	Site	2013	Year	2013	Unspecified	2013	2013	Potentially ongoing	708000			744964	744964	708000	744964	744964	USD	2013	Effective	Observed
1080	WoS	4411	Taking the sting out of Little Fire Ant in Hawaii	Lee et al		2015	English	Peer-reviewed article	NA	Yes	Animalia	Arthropoda	Insecta	Hymenoptera	Formicidae	Wasmannia	Wasmannia auropunctata		Little fire ant	Terrestrial	terrestrial					Oceania/Pacific Islands	USA	Hawaii	Hawaii	Site	35 years	Period	2015	2050	2015	2050	Potentially ongoing	6100000000			6308532545	6308532545	1.74286e+08	180243787	180243787	USD	2015	Publication year	Potential
1085	WoS	10825	A bioeconomic approach to assess the impact of an alien invasive insect on timber supply and harvesting: a case study with Sirex noctilio in eastern Canada	Yemshanov et al		2009	English	Peer-reviewed article	NA	Yes	Animalia	Arthropoda	Insecta	Hymenoptera	Siricidae	Sirex	Sirex noctilio		Sirex woodwasp	Terrestrial	terrestrial					North America	Canada		Eastern Canada	Site	28 years	Year	2009	2037	2009	2037	Potentially ongoing	170000000	86000000	254000000	1.94234e+08	1.8479e+08	170000000	1.94234e+08	1.8479e+08	USD	2009	Publication year	Potential
1086	WoS	8576	A Bayesian Bioeconometric Model of Invasive Species Control: The Case of the Hemlock Woolly Adelgid	Moore et al		2011	English	Peer-reviewed article	NA	Yes	Animalia	Arthropoda	Insecta	Hemiptera	Adelgidae	Adelges	Adelges tsugae		Hemlock woolly adelgid	Terrestrial	terrestrial					North America	USA		North Carolina	Unit (Household)	2006	Year	2006	Unspecified	2006	2006	Potentially ongoing	33	15	51	35.96	35.96	33	35.96	35.96	USD	2011	Publication year	Potential
1087	WoS	474	A safety rule approach to surveillance and eradication of biological invasions	Yemshanov et al		2017	English	Peer-reviewed article	NA	Yes	Animalia	Arthropoda	Insecta	Coleoptera	Cerambycidae	Anoplophora	Anoplophora glabripennis		Asian long-horned beetle	Terrestrial	terrestrial					North America	Canada		Ontario	Site	2013-2017	Period	2013	2017	2013	2017	One-time	11150000	8100000	14200000	8.59188e+06	8.8486e+06	2230000	1.71838e+06	1.76972e+06	CAD	2017	Publication year	Potential
1088	WoS	474	A safety rule approach to surveillance and eradication of biological invasions	Yemshanov et al		2017	English	Peer-reviewed article	NA	Yes	Animalia	Arthropoda	Insecta	Coleoptera	Cerambycidae	Anoplophora	Anoplophora glabripennis		Asian long-horned beetle	Terrestrial	terrestrial					North America	Canada		Ontario	Site	2013-2017	Period	2013	2017	2013	2017	Potentially ongoing	24699000	22896000	26502000	1.90324e+07	1.9601e+07	4939800	3.80647e+06	3.92021e+06	CAD	2017	Publication year	Potential
1089	WoS	9385	A spatial-dynamic value transfer model of economic losses from a biological invasion	Holmes et al		2010	English	Peer-reviewed article	NA	Yes	Animalia	Arthropoda	Insecta	Hemiptera	Adelgidae	Adelges	Adelges tsugae		Hemlock woolly adelgid	Terrestrial	terrestrial					North America	USA		Eastern USA	Site	1999–2008	Period	1999	2008	1999	2008	Potentially ongoing	20945500	12393000	29498000	2.54681e+07	2.54681e+07	2094550	2.54681e+06	2.54681e+06	USD	2006	Effective	Observed
1093	TC	311	Estimates of the potential cost of emerald ash borer (Agrilus planipennis Fairmaire) in Canadian municipalities	McKenney et al		2012	English	Peer-reviewed article	Niquidet, K., Tang, J., & Peter, B. (2016). Economic analysis of forest insect pests in Canada. Canadian Entomologist, 148(S1), S357–S366. https://doi.org/10.4039/tce.2015.27	Yes	Animalia	Arthropoda	Insecta	Coleoptera	Buprestidae	Agrilus	Agrilus planipennis		Emerald ash borer	Terrestrial	terrestrial					North America	Canada		Unspecified	Country	30 years	Period	2012	2042	2012	2042	Potentially ongoing	721000000	265000000	1177000000	7.86757e+08	6.63717e+08	2.40333e+07	2.62252e+07	2.21239e+07	CAD	2010	Effective	Potential
1101	WoS	8225	Evaluation of potential strategies to slow ash mortality (slam) caused by emerald ash borer (agrilus planipennis): Slam in an urban forest	McCullough et al		2012	English	Peer-reviewed article	NA	Yes	Animalia	Arthropoda	Insecta	Coleoptera	Buprestidae	Agrilus	Agrilus planipennis		Emerald ash borer	Terrestrial	terrestrial					North America	USA		Midwestern USA	Site	10 years	Period	2012	2022	2012	2022	Potentially ongoing	1900000			2.02848e+06	2.02848e+06	190000	202848	202848	USD	2012	Publication year	Potential
1102	WoS	8225	Evaluation of potential strategies to slow ash mortality (slam) caused by emerald ash borer (agrilus planipennis): Slam in an urban forest	McCullough et al		2012	English	Peer-reviewed article	NA	Yes	Animalia	Arthropoda	Insecta	Coleoptera	Buprestidae	Agrilus	Agrilus planipennis		Emerald ash borer	Terrestrial	terrestrial					North America	USA		Midwestern USA	Site	10 years	Period	2012	2022	2012	2022	Potentially ongoing	417151	304524	529778	445360	445360	41715.1	44536	44536	USD	2012	Publication year	Potential
1103	WoS	6666	Genetic Identification of an Unknown Rhagoletis Fruit Fly (Diptera: Tephritidae) Infesting Chinese Crabapple: Implications for Apple Pest Management	St. Jean et al		2013	English	Peer-reviewed article	NA	Yes	Animalia	Arthropoda	Insecta	Diptera	Tephritidae	Rhagoletis	Rhagoletis indifferens		Rhagoletis Fruit Fly	Terrestrial	terrestrial					North America	USA		Washington (Benton County)	Site	Unspecified	Year	Unspecified	Unspecified	2013	2013	One-time	500000			526105	526105	500000	526105	526105	USD	2013	Publication year	Potential
1104	TC	431	Myiasis: The battle continues against screwworm infestation	Reichard et al		1993	English	Peer-reviewed article	Myers, J. H., Savoie, A., & Van Randen, E. (1998). ERADICATION AND PEST MANAGEMENT. Annu. Rev. Entomol, 43, 471–91. (ID15710)	Yes	Animalia	Arthropoda	Insecta	Diptera	Calliphoridae	Cochliomyia	Cochliomyia hominivorax		New World Screwworm	Terrestrial	terrestrial					North America	Mexico/USA		Unspecified	Regional	Unspecified	Year	Unspecified	Unspecified	1993	1993	One-time	750000000			1272613931		750000000	1272613931		USD	1993	Publication year	Observed
1105	TC	431	Myiasis: The battle continues against screwworm infestation	Reichard et al		1993	English	Peer-reviewed article	Myers, J. H., Savoie, A., & Van Randen, E. (1998). ERADICATION AND PEST MANAGEMENT. Annu. Rev. Entomol, 43, 471–91. (ID15710)	Yes	Animalia	Arthropoda	Insecta	Diptera	Calliphoridae	Cochliomyia	Cochliomyia hominivorax		New World Screwworm	Terrestrial	terrestrial					North America	USA		Unspecified	Country	1993	Year	1993	Unspecified	1993	1993	Potentially ongoing	453000000			7.68659e+08	7.68659e+08	453000000	7.68659e+08	7.68659e+08	USD	1993	Publication year	Potential
1106	TC	431	Myiasis: The battle continues against screwworm infestation	Reichard et al		1993	English	Peer-reviewed article	Myers, J. H., Savoie, A., & Van Randen, E. (1998). ERADICATION AND PEST MANAGEMENT. Annu. Rev. Entomol, 43, 471–91. (ID15710)	Yes	Animalia	Arthropoda	Insecta	Diptera	Calliphoridae	Cochliomyia	Cochliomyia hominivorax		New World Screwworm	Terrestrial	terrestrial	NA			NA	North America	Mexico		Unspecified	Country	Unspecified	Year	Unspecified	Unspecified	1993	1993	Potentially ongoing	156000000			2.64704e+08	4.03053e+08	156000000	2.64704e+08	4.03053e+08	USD	1993	Publication year	Potential
1110	TC	576	The future of the mediterranean fruit fly Ceratitis capitata invasion of California: a predictive framework	Carey		1996	English	Peer-reviewed article	Myers, J. H., Savoie, A., & Van Randen, E. (1998). ERADICATION AND PEST MANAGEMENT. Annu. Rev. Entomol, 43, 471–91. (ID15710)	Yes	Animalia	Arthropoda	Insecta	Diptera	Tephritidae	Ceratitis	Ceratitis capitata		Mediterranean fruit fly	Terrestrial	terrestrial					North America	USA		California	Site	1980s	Period	1980	1989	1980	1989	One-time	1000000000			1562764318	1562764318	100000000	1.56276e+08	1.56276e+08	USD	1996	Publication year	Observed
1111	TC	567	The economics of insect control on wheat, corn, and canola in Canada, 1980–1985	Madder and Stemeroff		1988	English	Official report	Dosdall, L. M., Cárcamo, H., Olfert, O., Meers, S., Hartley, S., & Gavloski, J. (2011). Insect invasions of agroecosystems in the western Canadian prairies: case histories, patterns, and implications for ecosystem function. Biological Invasions, 13, 1135–1149. (ID8837)	Yes	Animalia	Arthropoda	Insecta	Coleoptera	Chrysomelidae	Phyllotreta	Phyllotreta cruciferae		Crucifer flea beetle/Striped flea beetle	Terrestrial	terrestrial					North America	Canada		Western Canadian agroecosystems	Site	1980-1985	Year	1980	1985	1980	1985	One-time	700240			1.17934e+06	1.17655e+06	700240	1.17934e+06	1.17655e+06	CAD	1988	Publication year	Observed
1112	TC	625	Western Committee on Crop Pests. 34th Annual Meeting	Harris et al		1995	English	Conference proceedings	Dosdall, L. M., Cárcamo, H., Olfert, O., Meers, S., Hartley, S., & Gavloski, J. (2011). Insect invasions of agroecosystems in the western Canadian prairies: case histories, patterns, and implications for ecosystem function. Biological Invasions, 13, 1135–1149. (ID8837)	No	Animalia	Arthropoda	Insecta	Lepidoptera	Plutellidae	Plutella	Plutella xylostella		Diamondback moth	Terrestrial	terrestrial					North America	Canada		Canadian prairies	Site	1995	Year	1995	Unspecified	1995	1995	Potentially ongoing	40000000			6.43429e+07	7.30277e+07	40000000	6.43429e+07	7.30277e+07	USD	1995	Publication year	Observed
1113	TC	509	Root maggots (Delia spp., Diptera: Anthomyiidae) in prairie canola (Brassica napus L. and B. rapa L.): spatial and temporal surveys of root damage and prediction of damage levels	Soroka et al		2004	English	Peer-reviewed article	Dosdall, L. M., Cárcamo, H., Olfert, O., Meers, S., Hartley, S., & Gavloski, J. (2011). Insect invasions of agroecosystems in the western Canadian prairies: case histories, patterns, and implications for ecosystem function. Biological Invasions, 13, 1135–1149. (ID8837)	Yes	Animalia	Arthropoda	Insecta	Diptera	Anthomyiidae	Delia	Delia spp.		Root maggots	Terrestrial	terrestrial					North America	Canada		Central Alberta	Site	1995	Year	1995	Unspecified	1995	1995	Potentially ongoing	100000000			1.17205e+08	1.33025e+08	100000000	1.17205e+08	1.33025e+08	CAD	1995	Effective	Observed
1127	WoS	10813	Non-native insects in agriculture: strategies to manage the economic and environmental impact of wheat midge, Sitodiplosis mosellana, in Saskatchewan	Olfert et al		2009	English	Peer-reviewed article	NA	Yes	Animalia	Arthropoda	Insecta	Diptera	Cecidomyiidae	Sitodiplosis	Sitodiplosis mosellana		Wheat midge	Terrestrial	terrestrial					North America	Canada		Saskatchewan	Site	1990s	Period	1990	1999	1990	1999	Potentially ongoing	248300000			2.48181e+08	2.36114e+08	24830000	2.48181e+07	2.36114e+07	CAD	2009	Publication year	Potential
1128	WoS	11236	To sample or eradicate? A cost minimization model for monitoring and managing an invasive species	Bogich et al		2008	English	Peer-reviewed article	NA	Yes	Animalia	Arthropoda	Insecta	Lepidoptera	Erebidae	Lymantria	Lymantria dispar		Gypsy moth	Terrestrial	terrestrial					North America	USA		Unspecified	Unit (10,000 Km²)	10,5 years	Period	2008	2018	2008	2018	Potentially ongoing	132400			158273	158273	12638.2	14388.5	14388.5	USD	2008	Publication year	Potential
1131	TC	337	Foreword. In: Methods for the study of pest Diabrotica	Metcalf		1987	English	Book chapter	Dillen, K., Mitchell, P. D., & Tollens, E. (2010). On the competitiveness of Diabrotica virgifera virgifera damage abatement strategies in Hungary: A bio-economic approach. Journal of Applied Entomology, 134(5), 395–408. https://doi.org/10.1111/j.1439-0418.2009.01454.x	No	Animalia	Arthropoda	Insecta	Coleoptera	Chrysomelidae	Diabrotica	Diabrotica barberi/Diabrotica undecimpunctata/Diabrotica virgifera		Northern corn Rootworm/Spotted cucumber beetle/Western corn rootworm	Terrestrial	terrestrial					North America	USA		Unspecified	Country	1987	Year	1987	Unspecified	1987	1987	Potentially ongoing	1000000000			2157268060	2157268060	1000000000	2157268060	2157268060	USD	1987	Publication year	Observed
1132	WoS	7904	Optimal control of soybean aphid in the presence of natural enemies and the implied value of their ecosystem services	Zhang et al		2012	English	Peer-reviewed article	NA	Yes	Animalia	Arthropoda	Insecta	Hemiptera	Aphididae	Aphis	Aphis glycines		Soybean aphids	Terrestrial	terrestrial					North America	USA		Iowa/Illinois/Indiana/Michigan/Minnesota	Site	Unspecified	Year	Unspecified	Unspecified	2012	2012	One-time	47500000	11000000	84000000	5.96194e+07	5.96194e+07	47500000	5.96194e+07	5.96194e+07	USD	2005	Effective	Observed
1133	WoS	7195	The welfare impacts of an invasive species: Endogenous vs. exogenous price models	McDermott et al		2013	English	Peer-reviewed article	NA	Yes	Animalia	Arthropoda	Insecta	Coleoptera	Buprestidae	Agrilus	Agrilus planipennis		Emerald ash borer	Terrestrial	terrestrial					North America	USA		Ohio	Site	2003	Year	2003	Unspecified	2003	2003	Potentially ongoing	63230000			6.65312e+07	6.65312e+07	63230000	6.65312e+07	6.65312e+07	USD	2013	Publication year	Potential
1134	WoS	7651	Optimal surveillance and eradication of invasive species in heterogeneous landscapes	Epanchin-Niell et al		2012	English	Peer-reviewed article	NA	Yes	Animalia	Arthropoda	Insecta	Lepidoptera	Erebidae	Lymantria	Lymantria dispar		Gypsy moth	Terrestrial	terrestrial					North America	USA		California	Site	2012	Year	2012	Unspecified	2012	2012	Potentially ongoing	1460000			1.55873e+06	1.55873e+06	1460000	1.55873e+06	1.55873e+06	USD	2012	Publication year	Potential
1135	WoS	4355	The Potential Distribution of Invading Helicoverpa armigera in North America: Is It Just a Matter of Time?	Kriticos et al		2015	English	Peer-reviewed article	NA	Yes	Animalia	Arthropoda	Insecta	Lepidoptera	Noctuidae	Helicoverpa	Helicoverpa armigera		Cotton bollworm	Terrestrial	terrestrial					North America	USA		Unspecified	Country	2005	Year	2005	Unspecified	2005	2005	Potentially ongoing	78254000000			98220206738	98220206738	78254000000	98220206738	98220206738	USD	2005	Effective	Potential
1136	WoS	8588	The influence of satellite populations of emerald ash borer on projected economic costs in U.S. communities, 2010-2020	Kovacs et al		2011	English	Peer-reviewed article	NA	Yes	Animalia	Arthropoda	Insecta	Coleoptera	Buprestidae	Agrilus	Agrilus planipennis		Emerald ash borer	Terrestrial	terrestrial					North America	USA		30 states	Country	2010-2020	Period	2010	2020	2010	2020	Potentially ongoing	1246200000			1358002829	1358002829	1.13291e+08	1.23455e+08	1.23455e+08	USD	2011	Publication year	Potential
1137	TC	361	Imported fire ant: economic impacts justifying integrated pest management programs	Drees and Lard		2006	English	Conference proceedings	Gutrich, J. J., VanGelder, E., & Loope, L. (2007). Potential economic impact of introduction and spread of the red imported fire ant, Solenopsis invicta, in Hawaii. Environmental Science & Policy, 10(7–8), 685–696. https://doi.org/10.1016/J.ENVSCI.2007.03.007	No	Animalia	Arthropoda	Insecta	Hymenoptera	Formicidae	Solenopsis	Solenopsis invicta		Red Imported Fire Ant	Terrestrial	terrestrial					North America	USA		Unspecified	Country	2006	Year	2006	Unspecified	2006	2006	Potentially ongoing	6000000000			7295527262	7295527262	6000000000	7295527262	7295527262	USD	2006	Publication year	Observed
1140	WoS	14022	The economic impact of Scirtothrips perseae Nakahara (Thysanoptera: Thripidae) on California avocado production	Hoddle et al		2003	English	Peer-reviewed article	NA	Yes	Animalia	Arthropoda	Insecta	Thysanoptera	Thripidae	Scirtothrips	Scirtothrips perseae		Avocado thrips	Terrestrial	terrestrial					North America	USA		Unspecified	Country	2003	Year	2003	Unspecified	2003	2003	Potentially ongoing	6925000	5200000	8650000	9.22738e+06	9.22738e+06	6925000	9.22738e+06	9.22738e+06	USD	2003	Publication year	Observed
1141	WoS	14022	The economic impact of Scirtothrips perseae Nakahara (Thysanoptera: Thripidae) on California avocado production	Hoddle et al		2003	English	Peer-reviewed article	NA	Yes	Animalia	Arthropoda	Insecta	Thysanoptera	Thripidae	Scirtothrips	Scirtothrips perseae		Avocado thrips	Terrestrial	terrestrial					North America	USA		Unspecified	Country	2003	Year	2003	Unspecified	2003	2003	Potentially ongoing	6480000	4450000	8510000	8.63443e+06	8.63443e+06	6480000	8.63443e+06	8.63443e+06	USD	2003	Publication year	Observed
1142	TC	583	The new world screwworm eradication programme in North Africa. An international effort aims to stop the spread of the health-threatening pest	Vloedt et al		1990	English	Official report	NA	Yes	Animalia	Arthropoda	Insecta	Diptera	Calliphoridae	Cochliomyia	Cochliomyia hominivorax		New World Screwworm	Terrestrial	terrestrial					North America	USA		Southeastern USA/Southwestern USA	Site	1990	Year	1990	Unspecified	1990	1990	Potentially ongoing	100000000			1.87603e+08	1.87603e+08	100000000	1.87603e+08	1.87603e+08	USD	1990	Publication year	Observed
1147	WoS	8142	The ecology, geopolitics, and economics of managing Lymantria dispar in the United States	Tobin et al		2012	English	Peer-reviewed article	NA	Yes	Animalia	Arthropoda	Insecta	Lepidoptera	Erebidae	Lymantria	Lymantria dispar		Gypsy Moth	Terrestrial	terrestrial					North America	USA		Unspecified	Country	1890-1900	Period	1890	1900	1890	1900	One-time	30800000			3.28828e+07	3.28828e+07	2800000	2.98934e+06	2.98934e+06	USD	2012	Publication year	Observed
1152	TC	448	On the trail of fire ant pheromones	Avant		2014	English	Web page	Wylie, F. R., & Janssen-May, S. (2016). Red Imported Fire Ant in Australia: What if we lose the war? Ecological Management & Restoration, 18(1), 1–13. https://doi.org/10.1111/emr.12238 (ID1562)	Yes	Animalia	Arthropoda	Insecta	Hymenoptera	Formicidae	Solenopsis	Solenopsis invicta		Red Imported Fire Ant	Terrestrial	terrestrial					North America	USA		Southern USA/Western USA	Site	2014	Year	2014	Unspecified	2014	2014	Potentially ongoing	7000000000			7247887416	7247887416	7000000000	7247887416	7247887416	USD	2014	Publication year	Observed
1153	TC	490	Red Imported Fire Ants : Feeding on Radiolabeled Citrus Trees	Smittle et al		1988	English	Peer-reviewed article	Wylie, F. R., & Janssen-May, S. (2016). Red Imported Fire Ant in Australia: What if we lose the war? Ecological Management & Restoration, 18(1), 1–13. https://doi.org/10.1111/emr.12238 (ID1562)	Yes	Animalia	Arthropoda	Insecta	Hymenoptera	Formicidae	Solenopsis	Solenopsis invicta		Red Imported Fire Ant	Terrestrial	terrestrial					North America	USA		Unspecified	Unit (Ha)	1-2 years	Year	Unspecified	Unspecified	1988	1988	Potentially ongoing	1382.1			1049.28		1382.06	1049.28		AUD	2016	Effective	Observed
1154	WoS	7185	Insect communities in soybeans of eastern South Dakota: The effects of vegetation management and pesticides on soybean aphids, bean leaf beetles, and their natural enemies	Lundgren et al		2013	English	Peer-reviewed article	NA	Yes	Animalia	Arthropoda	Insecta	Hemiptera	Aphididae	Aphis	Aphis glycines		Soybean aphid	Terrestrial	terrestrial					North America	USA		Unspecified	Unit (Ha)	2005-2007	Year	2005	2007	2005	2007	One-time	182.8			192.38	192.38	182.83	192.38	192.38	USD	2013	Publication year	Observed
1161	TC	405	Managing invasive populations of Asian longhorned beetle and citrus longhorned beetle: A worldwide perspective	Haack et al		2010	English	Peer-reviewed article	Barlow, L. A., Cecile, J., Bauch, C. T., & Anand, M. (2014). Modelling interactions between forest pest invasions and human decisions regarding firewood transport restrictions. PLoS ONE, 9(4). https://doi.org/10.1371/journal.pone.0090512	Yes	Animalia	Arthropoda	Insecta	Coleoptera	Cerambycidae	Anoplophora	Anoplophora glabripennis		Asian long-horned beetle	Terrestrial	terrestrial					North America	Canada		Unspecified	Country	2003-2008	Period	2003	2008	2003	2008	One-time	235000000			2.56432e+08	2.16329e+08	3.91667e+07	4.27387e+07	3.60549e+07	CAD	2010	Publication year	Observed
1162	TC	405	Managing invasive populations of Asian longhorned beetle and citrus longhorned beetle: A worldwide perspective	Haack et al		2010	English	Peer-reviewed article	Barlow, L. A., Cecile, J., Bauch, C. T., & Anand, M. (2014). Modelling interactions between forest pest invasions and human decisions regarding firewood transport restrictions. PLoS ONE, 9(4). https://doi.org/10.1371/journal.pone.0090512	Yes	Animalia	Arthropoda	Insecta	Coleoptera	Cerambycidae	Anoplophora	Anoplophora glabripennis		Asian long-horned beetle	Terrestrial	terrestrial					North America	USA		Illinois	Site	1998-2008	Period	1998	2008	1998	2008	One-time	6881000			7.73504e+06	7.73504e+06	625545	703185	703185	USD	2010	Publication year	Observed
1163	TC	405	Managing invasive populations of Asian longhorned beetle and citrus longhorned beetle: A worldwide perspective	Haack et al		2010	English	Peer-reviewed article	Barlow, L. A., Cecile, J., Bauch, C. T., & Anand, M. (2014). Modelling interactions between forest pest invasions and human decisions regarding firewood transport restrictions. PLoS ONE, 9(4). https://doi.org/10.1371/journal.pone.0090512	Yes	Animalia	Arthropoda	Insecta	Coleoptera	Cerambycidae	Anoplophora	Anoplophora glabripennis		Asian long-horned beetle	Terrestrial	terrestrial					North America	USA		New Jersey	Site	2002-2008	Period	2002	2008	2002	2008	One-time	6392000			7.18535e+06	7.18535e+06	913143	1.02648e+06	1.02648e+06	USD	2010	Publication year	Observed
1164	TC	405	Managing invasive populations of Asian longhorned beetle and citrus longhorned beetle: A worldwide perspective	Haack et al		2010	English	Peer-reviewed article	Barlow, L. A., Cecile, J., Bauch, C. T., & Anand, M. (2014). Modelling interactions between forest pest invasions and human decisions regarding firewood transport restrictions. PLoS ONE, 9(4). https://doi.org/10.1371/journal.pone.0090512	Yes	Animalia	Arthropoda	Insecta	Coleoptera	Cerambycidae	Anoplophora	Anoplophora glabripennis		Asian long-horned beetle	Terrestrial	terrestrial					North America	USA		New York	Site	1996-2008	Period	1996	2008	1996	2008	One-time	54114000			6.08304e+07	6.08304e+07	4.16262e+06	4.67926e+06	4.67926e+06	USD	2010	Publication year	Observed
1165	TC	405	Managing invasive populations of Asian longhorned beetle and citrus longhorned beetle: A worldwide perspective	Haack et al		2010	English	Peer-reviewed article	Barlow, L. A., Cecile, J., Bauch, C. T., & Anand, M. (2014). Modelling interactions between forest pest invasions and human decisions regarding firewood transport restrictions. PLoS ONE, 9(4). https://doi.org/10.1371/journal.pone.0090512	Yes	Animalia	Arthropoda	Insecta	Coleoptera	Cerambycidae	Anoplophora	Anoplophora glabripennis		Asian long-horned beetle	Terrestrial	terrestrial					North America	USA		Unspecified	Country	1996-2008	Period	1996	2008	1996	2008	One-time	373430000			4.19778e+08	4.19778e+08	2.87254e+07	3.22907e+07	3.22907e+07	USD	2010	Publication year	Observed
1168	WoS	5624	Modelling interactions between forest pest invasions and human decisions regarding firewood transport restrictions	Barlow et al		2014	English	Peer-reviewed article	NA	Yes	Animalia	Arthropoda	Insecta	Coleoptera	Buprestidae	Agrilus	Agrilus planipennis		Emerald ash borer	Terrestrial	terrestrial					North America	Canada		Unspecified	Country	April 2005-March 2010	Period	2005	2010	2005	2010	One-time	17600000			1.64752e+07	1.48113e+07	2.93333e+06	2.74586e+06	2.46856e+06	CAD	2014	Publication year	Observed
1169	WoS	5624	Modelling interactions between forest pest invasions and human decisions regarding firewood transport restrictions	Barlow et al		2014	English	Peer-reviewed article	NA	Yes	Animalia	Arthropoda	Insecta	Coleoptera	Buprestidae/Cerambycidae	Agrilus/Anoplophora	Agrilus planipennis/Anoplophora glabripennis		Emerald ash borer/Asian longhorned beetle	Terrestrial	terrestrial					North America	Canada		Unspecified	Unit (Bundle)	Unspecified	Year	Unspecified	Unspecified	2014	2014	One-time	3.4	2.5	4.25	3.16	2.84	3.38	3.16	2.84	CAD	2014	Publication year	Potential
1170	TC	563	The economic impact of the red imported fire ant on the homescape, landscape and the urbanscape of selected metroplexes of Texas: a part of the Texas fire ant initiative 1997–1999	Lard et al		1999	English	Official report	Vinson, S. B. (2013). Impact of the invasion of the imported fire ant. Insect Science, 20(4), 439–455. https://doi.org/10.1111/j.1744-7917.2012.01572.x	Yes	Animalia	Arthropoda	Insecta	Hymenoptera	Formicidae	Solenopsis	Solenopsis invicta		Red Imported Fire Ant	Terrestrial	terrestrial					North America	USA		Austin/Dallas/Ft. Worth/Houston/San Antonio	Site	1998	Year	1998	Unspecified	1998	1998	Potentially ongoing	581424292			8.74302e+08	8.74302e+08	581424292	8.74302e+08	8.74302e+08	USD	1998	Effective	Observed
1171	TC	563	The economic impact of the red imported fire ant on the homescape, landscape and the urbanscape of selected metroplexes of Texas: a part of the Texas fire ant initiative 1997–1999	Lard et al		1999	English	Official report	Vinson, S. B. (2013). Impact of the invasion of the imported fire ant. Insect Science, 20(4), 439–455. https://doi.org/10.1111/j.1744-7917.2012.01572.x	Yes	Animalia	Arthropoda	Insecta	Hymenoptera	Formicidae	Solenopsis	Solenopsis invicta		Red Imported Fire Ant	Terrestrial	terrestrial					North America	USA		Austin/Dallas/Ft. Worth/Houston/San Antonio	Unit (People)	1998	Year	1998	Unspecified	1998	1998	Potentially ongoing	1500			2255.59	2255.59	1500	2255.59	2255.59	USD	1998	Effective	Potential
1172	TC	563	The economic impact of the red imported fire ant on the homescape, landscape and the urbanscape of selected metroplexes of Texas: a part of the Texas fire ant initiative 1997–1999	Lard et al		1999	English	Official report	Vinson, S. B. (2013). Impact of the invasion of the imported fire ant. Insect Science, 20(4), 439–455. https://doi.org/10.1111/j.1744-7917.2012.01572.x	Yes	Animalia	Arthropoda	Insecta	Hymenoptera	Formicidae	Solenopsis	Solenopsis invicta		Red Imported Fire Ant	Terrestrial	terrestrial					North America	USA		Austin/Dallas/Ft. Worth/Houston/San Antonio	Unit (People)	1998	Year	1998	Unspecified	1998	1998	Potentially ongoing	89.5			134.54	134.54	89.47	134.54	134.54	USD	1998	Effective	Potential
1173	TC	563	The economic impact of the red imported fire ant on the homescape, landscape and the urbanscape of selected metroplexes of Texas: a part of the Texas fire ant initiative 1997–1999	Lard et al		1999	English	Official report	Vinson, S. B. (2013). Impact of the invasion of the imported fire ant. Insect Science, 20(4), 439–455. https://doi.org/10.1111/j.1744-7917.2012.01572.x	Yes	Animalia	Arthropoda	Insecta	Hymenoptera	Formicidae	Solenopsis	Solenopsis invicta		Red Imported Fire Ant	Terrestrial	terrestrial					North America	USA		Austin/Dallas/Ft. Worth/Houston/San Antonio	Unit (People)	1998	Year	1998	Unspecified	1998	1998	Potentially ongoing	1925			2894.67	2894.67	1925	2894.67	2894.67	USD	1998	Effective	Potential
1174	WoS	15699	Optimizing the Use of Barrier Zones to Slow the Spread of Gypsy Moth (Lepidoptera: Lymantriidae) in North America	Sharov et al		1998	English	Peer-reviewed article	NA	Yes	Animalia	Arthropoda	Insecta	Lepidoptera	Erebidae	Lymantria	Lymantria dispar		Gypsy moth	Terrestrial	terrestrial					North America	USA		Unspecified	Unit (1,000 Km)	1995	Year	1995	Unspecified	1995	1995	Potentially ongoing	10276000	8006000	12546000	1.54523e+07	1.54523e+07	10276000	1.54523e+07	1.54523e+07	USD	1998	Publication year	Observed
1175	WoS	15645	Boll Weevil Eradication : Area-Wide Pest Management	Smith		1998	English	Peer-reviewed article	NA	Yes	Animalia	Arthropoda	Insecta	Coleoptera	Curculionidae	Anthonomus	Anthonomus grandis		Boll weevil	Terrestrial	terrestrial					North America	USA		Unspecified	Country	About a century (Until 1998 = publication year)	Period	1888	1998	1888	1998	One-time	16650000000			25037008716	25037008716	150000000	2.25559e+08	2.25559e+08	USD	1998	Publication year	Observed
1176	WoS	15645	Boll Weevil Eradication : Area-Wide Pest Management	Smith		1998	English	Peer-reviewed article	NA	Yes	Animalia	Arthropoda	Insecta	Coleoptera	Curculionidae	Anthonomus	Anthonomus grandis		Boll weevil	Terrestrial	terrestrial					North America	USA		Unspecified	Country	1998	Year	1998	Unspecified	1998	1998	Potentially ongoing	225000000	150000000	300000000	3.38338e+08	3.38338e+08	225000000	3.38338e+08	3.38338e+08	USD	1998	Publication year	Observed
1177	WoS	15645	Boll Weevil Eradication : Area-Wide Pest Management	Smith		1998	English	Peer-reviewed article	NA	Yes	Animalia	Arthropoda	Insecta	Coleoptera	Curculionidae	Anthonomus	Anthonomus grandis		Boll weevil	Terrestrial	terrestrial					North America	USA		Unspecified	Country	1998	Year	1998	Unspecified	1998	1998	Potentially ongoing	100000000			1.50372e+08	1.50372e+08	100000000	1.50372e+08	1.50372e+08	USD	1998	Publication year	Observed
1178	WoS	15645	Boll Weevil Eradication : Area-Wide Pest Management	Smith		1998	English	Peer-reviewed article	NA	Yes	Animalia	Arthropoda	Insecta	Coleoptera	Curculionidae	Anthonomus	Anthonomus grandis		Boll weevil	Terrestrial	terrestrial					North America	USA		Georgia	Site	Unspecified	Year	Unspecified	Unspecified	1998	1998	Potentially ongoing	140000000	112000000	168000000	2.10521e+08	2.10521e+08	140000000	2.10521e+08	2.10521e+08	USD	1998	Publication year	Potential
1179	WoS	15645	Boll Weevil Eradication : Area-Wide Pest Management	Smith		1998	English	Peer-reviewed article	NA	Yes	Animalia	Arthropoda	Insecta	Coleoptera	Curculionidae	Anthonomus	Anthonomus grandis		Boll weevil	Terrestrial	terrestrial					North America	USA		North Carolina	Unit (Ha)	1998	Year	1998	1998	1998	1998	One-time	6.8			10.23	10.23	6.8	10.23	10.23	USD	1998	Publication year	Observed
1180	TC	469	Potential benefits of slowing the gypsy moth’s spread	Leuschner et al		1996	English	Peer-reviewed article	Sharov, A. A., & Liebhold, A. M. (1998). BIOECONOMICS OF MANAGING THE SPREAD OF EXOTIC PEST SPECIES WITH BARRIER ZONES. Ecological Applications, 8(3), 833–845.	Yes	Animalia	Arthropoda	Insecta	Lepidoptera	Erebidae	Lymantria	Lymantria dispar		Gypsy moth	Terrestrial	terrestrial					North America	USA		Southern USA/Western USA	Site	25 years	Period	1996	2021	1996	2021	Potentially ongoing	2722408000			5107332212	5107332212	104708000	1.96436e+08	1.96436e+08	USD	1990	Effective	Potential
1181	TC	469	Potential benefits of slowing the gypsy moth’s spread	Leuschner et al		1996	English	Peer-reviewed article	Sharov, A. A., & Liebhold, A. M. (1998). BIOECONOMICS OF MANAGING THE SPREAD OF EXOTIC PEST SPECIES WITH BARRIER ZONES. Ecological Applications, 8(3), 833–845.	Yes	Animalia	Arthropoda	Insecta	Lepidoptera	Erebidae	Lymantria	Lymantria dispar		Gypsy moth	Terrestrial	terrestrial					North America	USA		Southern USA/Western USA	Site	Unspecified	Year	Unspecified	Unspecified	1996	1996	Potentially ongoing	92000000			1.72595e+08	1.72595e+08	92000000	1.72595e+08	1.72595e+08	USD	1990	Effective	Potential
1182	WoS	15608	BIOECONOMICS OF MANAGING THE SPREAD OF EXOTIC PEST SPECIES WITH BARRIER ZONES	Sharov et al		1998	English	Peer-reviewed article	NA	Yes	Animalia	Arthropoda	Insecta	Lepidoptera	Erebidae	Lymantria	Lymantria dispar		Gypsy moth	Terrestrial	terrestrial					North America	USA		Unspecified	Unit (Km)	Unspecified	Year	Unspecified	Unspecified	1998	1998	Potentially ongoing	1900500	461000	3340000	2.85783e+06	2.85783e+06	1900500	2.85783e+06	2.85783e+06	USD	1998	Publication year	Potential
1183	WoS	15608	BIOECONOMICS OF MANAGING THE SPREAD OF EXOTIC PEST SPECIES WITH BARRIER ZONES	Sharov et al		1998	English	Peer-reviewed article	NA	Yes	Animalia	Arthropoda	Insecta	Lepidoptera	Erebidae	Lymantria	Lymantria dispar		Gypsy moth	Terrestrial	terrestrial					North America	USA		Unspecified	Unit (Km²)	5 years	Period	1993	1998	1993	1998	One-time	31000			46615.4	46615.4	6200	9323.09	9323.09	USD	1998	Publication year	Potential
1184	WoS	9319	Market-based instruments for the Optimal Control of Invasive Insect species: B. tabaci in Arizona	Richards et al		2010	English	Peer-reviewed article	NA	Yes	Animalia	Arthropoda	Insecta	Hemiptera	Aleyrodidae	Bemisia	Bemisia tabaci		Tobacco whitefly	Terrestrial	terrestrial					North America	USA		Arizona	Site	Unspecified	Year	Unspecified	Unspecified	2010	2010	One-time	66998.1	64321.9	69674.4	75313.6	75313.6	66998.1	75313.6	75313.6	USD	2010	Publication year	Potential
1187	TC	597	The study of subterranean termites: a laboratory and field approach	Lund		1967	English	Conference proceedings	Buczkowski, G., & Bertelsmeier, C. (2017). Invasive termites in a changing climate: A global perspective. Ecology and Evolution, 7(3), 974–985. https://doi.org/10.1002/ece3.2674	No	Animalia	Arthropoda	Insecta	Blattodea	Rhinotermitidae	Diverse/Unspecified	Diverse/Unspecified		Subterranean termites	Terrestrial	terrestrial					North America	USA		Unspecified	Country	1967	Year	1967	Unspecified	1967	1967	Potentially ongoing	100000000			7.34808e+08	7.34808e+08	100000000	7.34808e+08	7.34808e+08	USD	1967	Publication year	Observed
1188	TC	544	TERMITES IDENTIFICATION, BIOLOGY, AND CONTROL OF TERMITES ATTACKING BUILDINGS	Ebeling		1968	English	Book	Buczkowski, G., & Bertelsmeier, C. (2017). Invasive termites in a changing climate: A global perspective. Ecology and Evolution, 7(3), 974–985. https://doi.org/10.1002/ece3.2674 --> Su, N.-Y., & Scheffrahn, R. H. (1990)	Yes	Animalia	Arthropoda	Insecta	Isoptera	Diverse/Unspecified	Diverse/Unspecified	Diverse/Unspecified		Termites	Terrestrial	terrestrial					North America	USA		Unspecified	Country	1968	Year	1968	Unspecified	1968	1968	Potentially ongoing	500000000			3523520604	3523520604	500000000	3523520604	3523520604	USD	1968	Publication year	Observed
1189	TC	365	Insects affecting man and his possessions. Research needs in the southern region	Anonymous		1974	English	Official report	Su, N.-Y., & Scheffrahn, R. H. (1990) HW FROM Buczkowski, G., & Bertelsmeier, C. (2017). Invasive termites in a changing climate: A global perspective. Ecology and Evolution, 7(3), 974–985. https://doi.org/10.1002/ece3.2674	No	Animalia	Arthropoda	Insecta	Blattodea	Rhinotermitidae	Diverse/Unspecified	Diverse/Unspecified		Subterranean termites	Terrestrial	terrestrial					North America	USA		Unspecified	Country	1974	Year	1974	Unspecified	1974	1974	Potentially ongoing	3400000000			16901941862	16901941862	3400000000	16901941862	16901941862	USD	1974	Publication year	Observed
1190	TC	310	Estimated Losses Caused by Wood Products Insects During 1970 for Single-Family Dwellings in 11 Southern States	William and Smythe		1978	English	Official report	Su, N.-Y., & Scheffrahn, R. H. (1990) HW FROM Buczkowski, G., & Bertelsmeier, C. (2017). Invasive termites in a changing climate: A global perspective. Ecology and Evolution, 7(3), 974–985. https://doi.org/10.1002/ece3.2674	Yes	Animalia	Arthropoda	Insecta	Blattodea	Rhinotermitidae/Diverse	Diverse/Unspecified	Diverse/Unspecified		Subterranean termites/Wood-destroying beetles	Terrestrial	terrestrial					North America	USA		11 South Eastern States	Site	1970	Year	1970	Unspecified	1970	1970	Potentially ongoing	143100000			6.1637e+08	6.1637e+08	143100000	6.1637e+08	6.1637e+08	USD	1976	Effective	Observed
1191	TC	220	Comparative benefit analysis of the seven chemicals registered for use on subterranean termites. Draft of part of the benefits and field stud. div., off. pestic. programs, envir. protection agency's cluster analysis.	Anonymous		1981	English	Official report	Su, N.-Y., & Scheffrahn, R. H. (1990) Economically important termites in the United States and their control. Sociobiology, 17, 77–94. FROM Buczkowski, G., & Bertelsmeier, C. (2017). Invasive termites in a changing climate: A global perspective. Ecology and Evolution, 7(3), 974–985. https://doi.org/10.1002/ece3.2674	No	Animalia	Arthropoda	Insecta	Blattodea	Rhinotermitidae	Diverse/Unspecified	Diverse/Unspecified		Subterranean termites	Terrestrial	terrestrial					North America	USA		Unspecified	Country	1976	Year	1976	Unspecified	1976	1976	Potentially ongoing	612000000	471000000	753000000	1649856310	1649856310	612000000	1649856310	1649856310	USD	1981	Publication year	Observed
1192	TC	520	Southeastern branch insect detection, evaluation and prediction report 1983	Hamer		1985	English	Official report	Buczkowski, G., & Bertelsmeier, C. (2017). Invasive termites in a changing climate: A global perspective. Ecology and Evolution, 7(3), 974–985. https://doi.org/10.1002/ece3.2674 --> Su, N.-Y., & Scheffrahn, R. H. (1990)	No	Animalia	Arthropoda	Insecta	Diverse/Unspecified	Diverse/Unspecified	Diverse/Unspecified	Diverse/Unspecified			Terrestrial	terrestrial					North America	USA		9 South Eastern States	Site	1983	Year	1983	Unspecified	1983	1983	Potentially ongoing	579000000			1319407240	1319407240	579000000	1319407240	1319407240	USD	1985	Publication year	Observed
1193	TC	545	Termites in buildings. Their biology and control	Edwards and Mill		1986	English	Official report	Buczkowski, G., & Bertelsmeier, C. (2017). Invasive termites in a changing climate: A global perspective. Ecology and Evolution, 7(3), 974–985. https://doi.org/10.1002/ece3.2674 --> Su, N.-Y., & Scheffrahn, R. H. (1990)	No	Animalia	Arthropoda	Insecta	Isoptera	Diverse/Unspecified	Diverse/Unspecified	Diverse/Unspecified		Termites	Terrestrial	terrestrial					North America	USA		Unspecified	Country	1986	Year	1986	Unspecified	1986	1986	Potentially ongoing	1020000000			2281048962	2281048962	1020000000	2281048962	2281048962	USD	1986	Publication year	Observed
1194	TC	237	Damage by the Formosan subterranean termite. USDA report	Anonymous		1966	English	Official report	Su, N.-Y., & Scheffrahn, R. H. (1990) HW FROM Buczkowski, G., & Bertelsmeier, C. (2017). Invasive termites in a changing climate: A global perspective. Ecology and Evolution, 7(3), 974–985. https://doi.org/10.1002/ece3.2674	No	Animalia	Arthropoda	Insecta	Blattodea	Rhinotermitidae	Coptotermes	Coptotermes formosanus		Formosan termite	Terrestrial	terrestrial					Oceania/Pacific Islands	USA	Hawaii	Hawaii (Honolulu)	Site	1966	Year	1966	Unspecified	1966	1966	Potentially ongoing	3000000			2.26555e+07	2.26555e+07	3000000	2.26555e+07	2.26555e+07	USD	1966	Publication year	Observed
1195	TC	221	Comparison of eleven soil termiticides against the Formosan subterranean termite and eastern subterranean termite (Isoptera: Rhinotermitidae)	Su and Scheffrahn		1990	English	Peer-reviewed article	Buczkowski, G., & Bertelsmeier, C. (2017). Invasive termites in a changing climate: A global perspective. Ecology and Evolution, 7(3), 974–985. https://doi.org/10.1002/ece3.2674	Yes	Animalia	Arthropoda	Insecta	Blattodea	Rhinotermitidae	Coptotermes	Coptotermes formosanus		Formosan termite	Terrestrial	terrestrial					Oceania/Pacific Islands	USA	Hawaii	Hawaii (Honolulu)	Site	Unspecified	Year	Unspecified	Unspecified	1990	1990	Potentially ongoing	22500000	15000000	30000000	4.22108e+07	4.22108e+07	22500000	4.22108e+07	4.22108e+07	USD	1990	Publication year	Observed
1196	TC	221	Comparison of eleven soil termiticides against the Formosan subterranean termite and eastern subterranean termite (Isoptera: Rhinotermitidae)	Su and Scheffrahn		1990	English	Peer-reviewed article	Buczkowski, G., & Bertelsmeier, C. (2017). Invasive termites in a changing climate: A global perspective. Ecology and Evolution, 7(3), 974–985. https://doi.org/10.1002/ece3.2674	Yes	Animalia	Arthropoda	Insecta	Blattodea	Rhinotermitidae	Coptotermes	Coptotermes formosanus		Formosan termite	Terrestrial	terrestrial					Oceania/Pacific Islands	USA	Hawaii	Hawaii	Site	1985	Year	1985	Unspecified	1985	1985	Potentially ongoing	55000000	50000000	60000000	1.03182e+08	1.03182e+08	55000000	1.03182e+08	1.03182e+08	USD	1990	Publication year	Observed
1199	TC	329	Final programmatic environmental impact statement for the cooperative imported fire ant program	Canter		1981	English	Official report	Jemal, A., & Hugh-Jones, M. (1993). A review of the red imported fire ant (Solenopsis invicta Buren) and its impacts on plant, animal, and human health. Preventive Veterinary Medicine, 17(1–2), 19–32. https://doi.org/10.1016/0167-5877(93)90051-T --> Lofgren, C.S., 1986b. The economic importance and control of imported fire ants in the United States. In: S.B. Vinson (Editor), Economic Impact and C…	No	Animalia	Arthropoda	Insecta	Hymenoptera	Formicidae	Solenopsis	Solenopsis invicta		Red Imported Fire Ant	Terrestrial	terrestrial					North America	USA		Unspecified	Country	1957-1981	Period	1957	1981	1957	1981	One-time	1.79167e+08			4.63685e+08	#DIV/0!	6880000	1.85474e+07	#DIV/0!	USD	1981	Publication year	Observed
1200	TC	223	Control horn flies with back rubbers	Burns et al		1962	English	Official report	Jemal, A., & Hugh-Jones, M. (1993). A review of the red imported fire ant (Solenopsis invicta Buren) and its impacts on plant, animal, and human health. Preventive Veterinary Medicine, 17(1–2), 19–32. https://doi.org/10.1016/0167-5877(93)90051-T	No	Animalia	Arthropoda	Insecta	Diptera	Muscidae	Haematobia	Haematobia irritans		Horn fly	Terrestrial	terrestrial					North America	USA		Unspecified	Country	1962	Year	1962	Unspecified	1962	1962	Potentially ongoing	150000000			1215469008	1215469008	150000000	1215469008	1215469008	USD	1962	Publication year	Observed
1201	TC	257	Economic aspects of the imported fire ant in the United States	Lofgren and Adams		1982	English	Book chapter	Jemal, A., & Hugh-Jones, M. (1993). A review of the red imported fire ant (Solenopsis invicta Buren) and its impacts on plant, animal, and human health. Preventive Veterinary Medicine, 17(1–2), 19–32. https://doi.org/10.1016/0167-5877(93)90051-T	Yes	Animalia	Arthropoda	Insecta	Hymenoptera	Formicidae	Solenopsis	Solenopsis invicta		Red Imported Fire Ant	Terrestrial	terrestrial					North America	USA		Southern USA	Site	1979	Year	1979	Unspecified	1979	1979	Potentially ongoing	2840000			7.21388e+06	7.21388e+06	2840000	7.21388e+06	7.21388e+06	USD	1982	Publication year	Observed
1202	TC	257	Economic aspects of the imported fire ant in the United States	Lofgren and Adams		1982	English	Book chapter	Jemal, A., & Hugh-Jones, M. (1993). A review of the red imported fire ant (Solenopsis invicta Buren) and its impacts on plant, animal, and human health. Preventive Veterinary Medicine, 17(1–2), 19–32. https://doi.org/10.1016/0167-5877(93)90051-T	Yes	Animalia	Arthropoda	Insecta	Hymenoptera	Formicidae	Solenopsis	Solenopsis invicta		Red Imported Fire Ant	Terrestrial	terrestrial					North America	USA		Southern USA	Site	1981	Year	1981	Unspecified	1981	1981	Potentially ongoing	125000000			3.17512e+08	3.17512e+08	125000000	3.17512e+08	3.17512e+08	USD	1982	Publication year	Observed
1204	TC	286	Embargo on California produce would cause revenue, job loss	Siebert and Cooper		1995	English	Peer-reviewed article	Sanders, C. J., Mellor, P. S., & Wilson, a J. (2010). Invasive arthropods. Revue Scientifique et Technique (International Office of Epizootics), 29(2), 273–86. Retrieved from http://www.ncbi.nlm.nih.gov/pubmed/20919582	Yes	Animalia	Arthropoda	Insecta	Diptera	Tephritidae	Ceratitis	Ceratitis capitata		Mediterranean fruit fly	Terrestrial	terrestrial					North America	USA		California	Site	Unspecified	Year	Unspecified	Unspecified	1995	1995	Potentially ongoing	1000000000			1608572132	1608572132	1000000000	1608572132	1608572132	USD	1995	Publication year	Potential
1206	TC	505	Rhipicephalus (Boophilus) microplus, southern cattle tick, cattle tick. CFSPH, Ames, Iowa	Centre for Food Security and Public Health (CFSPH), Iowa State University (2007).		2007	English	Official report	Sanders, C. J., Mellor, P. S., & Wilson, a J. (2010). Invasive arthropods. Revue Scientifique et Technique (International Office of Epizootics), 29(2), 273–86. Retrieved from http://www.ncbi.nlm.nih.gov/pubmed/20919582	Yes	Animalia	Arthropoda	Arachnida	Ixodida	Ixodidae	Rhipicephalus	Rhipicephalus microplus		Cattle tick	Terrestrial	terrestrial					North America	USA		Unspecified	Country	2007	Year	2007	Unspecified	2007	2007	Potentially ongoing	3000000000			3546591005	3546591005	3000000000	3546591005	3546591005	USD	2007	Effective	Observed
1208	TC	260	Economic assessments of red imported fire ant on Texas’ urban and agricultural sectors	Lard et al		2002	English	Peer-reviewed article	NA	Yes	Animalia	Arthropoda	Insecta	Hymenoptera	Formicidae	Solenopsis	Solenopsis invicta		Red Imported Fire Ant	Terrestrial	terrestrial					North America	USA		Texas	Site	1998	Year	1998	Unspecified	1998	1998	Potentially ongoing	581424292			7.9232e+08	7.9232e+08	581424292	7.9232e+08	7.9232e+08	USD	2002	Publication year	Observed
1209	TC	260	Economic assessments of red imported fire ant on Texas’ urban and agricultural sectors	Lard et al		2002	English	Peer-reviewed article	NA	Yes	Animalia	Arthropoda	Insecta	Hymenoptera	Formicidae	Solenopsis	Solenopsis invicta		Red Imported Fire Ant	Terrestrial	terrestrial					North America	USA		Texas	Site	1999	Year	1999	Unspecified	1999	1999	Potentially ongoing	90572032			1.23424e+08	1.23424e+08	90572032	1.23424e+08	1.23424e+08	USD	2002	Publication year	Observed
1210	TC	260	Economic assessments of red imported fire ant on Texas’ urban and agricultural sectors	Lard et al		2002	English	Peer-reviewed article	NA	Yes	Animalia	Arthropoda	Insecta	Hymenoptera	Formicidae	Solenopsis	Solenopsis invicta		Red Imported Fire Ant	Terrestrial	terrestrial					North America	USA		Texas	Unit (People)	1999	Year	1999	Unspecified	1999	1999	Potentially ongoing	89			121.28	121.28	89	121.28	121.28	USD	2002	Publication year	Potential
1212	WoS	7729	Impacts of climate, land use, and biological invasion on the ecology of immature aedes mosquitoes: Implications for la crosse emergence	Leisnham and Juliano		2012	English	Peer-reviewed article	NA	Yes	Animalia	Arthropoda	Insecta	Diptera	Culicidae	Aedes	Aedes albopictus/Aedes japonicus		Asian tiger mosquito/Asian Rock Pool Mosquito	Terrestrial	semi-aquatic					North America	USA		North Carolina	Site	90 accumulated life years	Period	1922	2012	1922	2012	Potentially ongoing	800000			854098	854098	8888.89	9489.98	9489.98	USD	2012	Publication year	Observed
1213	WoS	7729	Impacts of climate, land use, and biological invasion on the ecology of immature aedes mosquitoes: Implications for la crosse emergence	Leisnham and Juliano		2012	English	Peer-reviewed article	NA	Yes	Animalia	Arthropoda	Insecta	Diptera	Culicidae	Aedes	Aedes albopictus/Aedes japonicus		Asian tiger mosquito/Asian Rock Pool Mosquito	Terrestrial	semi-aquatic					North America	USA		North Carolina	Unit (Patient)	Unspecified	Year	Unspecified	Unspecified	2012	2012	Potentially ongoing	3090798			3.2998e+06	3.2998e+06	3090798	3.2998e+06	3.2998e+06	USD	2012	Publication year	Potential
1214	TC	585	The North African screwworm eradication programme	Cunningham et al		1992	English	Peer-reviewed article	NA	Yes	Animalia	Arthropoda	Insecta	Diptera	Calliphoridae	Cochliomyia	Cochliomyia hominivorax		New World Screwworm	Terrestrial	terrestrial					North America	USA		Texas	Site	1992	Year	1992	Unspecified	1992	1992	Potentially ongoing	300000000			5.24071e+08	5.24071e+08	300000000	5.24071e+08	5.24071e+08	USD	1992	Publication year	Observed
1219	WoS	9017	Using Citizen Science Programs to Identify Host Resistance in Pest-Invaded Forests	Ingwell et al		2011	English	Peer-reviewed article	NA	Yes	Animalia	Arthropoda	Insecta	Hemiptera	Adelgidae	Adelges	Adelges tsugae		Hemlock woolly adelgid	Terrestrial	terrestrial					North America	USA		North-Eastern USA	Unit (Material)	2011	Year	2011	2011	2011	2011	One-time	300			326.91	326.91	300	326.91	326.91	USD	2011	Publication year	Observed
1223	TC	632	Yellow head disease caused by a newly discovered Mattesia sp. in populations of the red imported fire ant, Solenopsis invicta	Pereira et al		2002	English	Peer-reviewed article	Pereira, R. M. (2003). Areawide suppression of fire ant populations in pastures: project update. Journal of Agricultural and Urban Entomology, 20(3), 123–130.	Yes	Animalia	Arthropoda	Insecta	Hymenoptera	Formicidae	Solenopsis	Solenopsis invicta		Red Imported Fire Ant	Terrestrial	terrestrial					North America	USA		Unspecified	Unit (Ha)	2002	Year	2002	Unspecified	2002	2002	Potentially ongoing	6500000000			8857691684	8857691684	6500000000	8857691684	8857691684	USD	2002	Publication year	Observed
1224	TC	538	Suppression of Hemlock Woolly Adelgid Infestations. Tech. rep, United States Department of Agriculture and Forest Service	Jacobs		2005	English	Official report	In Marten, A. L., & Moore, C. C. (2011). An options based bioeconomic model for biological and chemical control of invasive species. Ecological Economics, 70(11), 2050–2061. https://doi.org/10.1016/j.ecolecon.2011.05.022	No	Animalia	Arthropoda	Insecta	Hemiptera	Adelgidae	Adelges	Adelges tsugae		Hemlock woolly adelgid	Terrestrial	terrestrial					North America	USA		Unspecified	Country	Unspecified	Year	Unspecified	Unspecified	2005	2005	One-time	450000			564816	564816	450000	564816	564816	USD	2005	Publication year	Observed
1228	TC	455	Ornamental, lawn and turf insects	Hudson et al		1997	English	Web page	Dolinski, C., Choo, H. Y., & Duncan, L. W. (2012). Grower Acceptance of Entomopathogenic Nematodes: Case Studies on Three Continents. Journal of Nematology, 44(2), 226–235. Retrieved from https://www.ncbi.nlm.nih.gov/pmc/articles/PMC3578461/pdf/226.pdf	Yes	Animalia	Arthropoda	Insecta	Orthoptera	Gryllotalpidae	Scapteriscus	Scapteriscus spp.		Mole crickets	Terrestrial	terrestrial					North America	USA		Georgia	Site	1995	Year	1995	Unspecified	1995	1995	Potentially ongoing	25567000			4.11264e+07	4.11264e+07	25567000	4.11264e+07	4.11264e+07	USD	1995	Effective	Observed
1229	TC	458	Pasture and forage insects	Buntin et al		1997	English	Book chapter	Dolinski, C., Choo, H. Y., & Duncan, L. W. (2012). Grower Acceptance of Entomopathogenic Nematodes: Case Studies on Three Continents. Journal of Nematology, 44(2), 226–235. Retrieved from https://www.ncbi.nlm.nih.gov/pmc/articles/PMC3578461/pdf/226.pdf	Yes	Animalia	Arthropoda	Insecta	Orthoptera	Gryllotalpidae	Neoscapteriscus	Neoscapteriscus vicinus		Mole cricket	Terrestrial	terrestrial					North America	USA		Georgia	Site	Unspecified	Year	Unspecified	Unspecified	1997	1997	One-time	14502000			2.26632e+07	2.26632e+07	14502000	2.26632e+07	2.26632e+07	USD	1996	Effective	Observed
1230	TC	206	Biological control of Diaprepes abbreviatus by parasitoids. Diaprepes Short Course, University of Florida, IFAS, Lake Alfred, FL. March 22th, 2000	Pena et al		2000	English	Web page	NA	Yes	Animalia	Arthropoda	Insecta	Coleoptera	Curculionidae	Diaprepes	Diaprepes sp.		Root weevil	Terrestrial	terrestrial					North America	USA		Florida	Site	1997-1999	Period	1997	1999	1997	1999	Potentially ongoing	2000000			2.84692e+06	2.84692e+06	666667	948972	948972	USD	2000	Publication year	Observed
1231	TC	206	Biological control of Diaprepes abbreviatus by parasitoids. Diaprepes Short Course, University of Florida, IFAS, Lake Alfred, FL. March 22th, 2000	Pena et al		2000	English	Web page	Doherty, T. S., & Ritchie, E. G. (2017). Stop Jumping the Gun: A Call for Evidence-Based Invasive Predator Management. Conservation Letters, 10(1), 15–22. https://doi.org/10.1111/conl.12251	Yes	Animalia	Arthropoda	Insecta	Coleoptera	Curculionidae	Diaprepes	Diaprepes sp.		Root weevil	Terrestrial	terrestrial					North America	USA		Florida	Site	2000	Year	2000	Unspecified	2000	2000	Potentially ongoing	72000000			1.02489e+08	1.02489e+08	72000000	1.02489e+08	1.02489e+08	USD	2000	Publication year	Observed
1232	WoS	7771	Grower Acceptance of Entomopathogenic Nematodes: Case Studies on Three Continents	Dolinski et al		2012	English	Peer-reviewed article	NA	Yes	Animalia	Arthropoda	Insecta	Coleoptera	Curculionidae	Diaprepes	Diaprepes sp.		Root weevil	Terrestrial	terrestrial					North America	USA		Unspecified	Country	1998-2008	Year	1998	2008	1998	2008	One-time	400000			427049	427049	400000	427049	427049	USD	2012	Publication year	Observed
1237	TC	596	The statewide economic impact of red imported fire ants in Texas: A part of the Texas Fire Ant Initiative 1999-2001	Lard et al		2001	English	Official report	Sternberg, T., Perry, G., & Britton, C. (2006). Grass repellency to the red imported fire ant. Rangeland Ecology and Management, 59(3), 330–333. https://doi.org/10.2111/05-151R1.1	Yes	Animalia	Arthropoda	Insecta	Hymenoptera	Formicidae	Solenopsis	Solenopsis invicta		Red Imported Fire Ant	Terrestrial	terrestrial					North America	USA		Texas	Site	1999	Year	1999	Unspecified	1999	1999	Potentially ongoing	1204207194			1667026161	1667026161	1204207194	1667026161	1667026161	USD	2001	Publication year	Observed
1238	WoS	5425	Potential Impact of Halyomorpha halys (Hemiptera : Pentatomidae) on Grape Production in the Finger Lakes Region of New York	Smith et al		2014	English	Peer-reviewed article	NA	Yes	Animalia	Arthropoda	Insecta	Hemiptera	Pentatomidae	Halyomorpha	Halyomorpha halys		Brown marmorated stink bug	Terrestrial	terrestrial					North America	USA		New York (Finger Lakes region)	Unit (Ha)	2012	Year	2012	Unspecified	2012	2012	Potentially ongoing	3250	1100	5400	3365.09	3365.09	3250	3365.09	3365.09	USD	2014	Publication year	Observed
1242	WoS	10992	Economic impacts of invasive species in forests: past, present, and future	Holmes et al		2009	English	Peer-reviewed article	NA	Yes	Animalia	Arthropoda	Insecta	Hemiptera	Adelgidae	Adelges	Adelges tsugae		Hemlock woolly adelgid	Terrestrial	terrestrial					North America	USA		North Carolina	Site	2008	Year	2008	Unspecified	2008	2008	Potentially ongoing	100000000			1.14255e+08	1.14255e+08	100000000	1.14255e+08	1.14255e+08	USD	2009	Publication year	Potential
1244	WoS	12815	Characterized and projected costs of nonindigenous species in Canada	Colautti et al		2006	English	Peer-reviewed article	NA	Yes	Animalia	Arthropoda	Insecta	Coleoptera	Buprestidae	Agrilus	Agrilus planipennis		Emerald ash borer	Terrestrial	terrestrial					North America	Canada		Essex County	Site	2003-2004	Year	2003	2004	2004	2004	One-time	8250000	7000000	9500000	8.22914e+06	8.68602e+06	8250000	8.22914e+06	8.68602e+06	CAD	2004	Effective	Observed
1247	WoS	12815	Characterized and projected costs of nonindigenous species in Canada	Colautti et al		2006	English	Peer-reviewed article	NA	Yes	Animalia	Arthropoda	Insecta	Coleoptera	Cerambycidae	Anoplophora	Anoplophora glabripennis		Asian long-horned beetle	Terrestrial	terrestrial					North America	Canada		Unspecified	Country	2002	Year	2002	Unspecified	2002	2002	Potentially ongoing	428481000	343048000	891925000	3.72073e+08	474973338	428481000	3.72073e+08	474973338	CAD	2002	Effective	Observed
1251	WoS	16601	Identification of a whitefly species by genomic and behavioural-studies	Perring et al		1993	English	Peer-reviewed article	NA	No	Animalia	Arthropoda	Insecta	Hemiptera	Aleyrodidae	Bemisia	Bemisia tabaci		Silverleaf whitefly	Terrestrial	terrestrial					North America	USA		Southern USA	Site	1991	Year	1991	Unspecified	1991	1991	Potentially ongoing	500000000			8.48409e+08	8.48409e+08	500000000	8.48409e+08	8.48409e+08	USD	1993	Publication year	Observed
1252	TC	352	History, current status, and collaborative research projects for Bemisia tabaci	Oliveira et al		2001	English	Peer-reviewed article	NA	Yes	Animalia	Arthropoda	Insecta	Hemiptera	Aleyrodidae	Bemisia	Bemisia tabaci		Tobacco whitefly	Terrestrial	terrestrial					North America	USA		Arizona/California/Texas/Florida	Site	1991-1992	Year	1991	1992	1992	1992	Potentially ongoing	350000000	200000000	500000000	4.84517e+08	4.84517e+08	350000000	4.84517e+08	4.84517e+08	USD	2001	Publication year	Observed
1253	TC	352	History, current status, and collaborative research projects for Bemisia tabaci	Oliveira et al		2001	English	Peer-reviewed article	NA	Yes	Animalia	Arthropoda	Insecta	Hemiptera	Aleyrodidae	Bemisia	Bemisia tabaci		Tobacco whitefly	Terrestrial	terrestrial					North America	USA		California	Site	1999	Year	1999	Unspecified	1999	1999	Potentially ongoing	100000000			1.38433e+08	1.38433e+08	100000000	1.38433e+08	1.38433e+08	USD	2001	Publication year	Observed
1254	TC	532	Sticky cotton sources and solutions	Ellsworth et al		1999	English	Official report	In Oliveira et al. 2001	No	Animalia	Arthropoda	Insecta	Hemiptera	Aleyrodidae	Bemisia	Bemisia tabaci		Tobacco whitefly	Terrestrial	terrestrial					North America	USA		Arizona/California/Texas	Site	1994-1998	Period	1994	1998	1994	1998	One-time	153900000			2.26468e+08	2.26468e+08	30780000	4.52936e+07	4.52936e+07	USD	1999	Publication year	Observed
1255	TC	352	History, current status, and collaborative research projects for Bemisia tabaci	Oliveira et al		2001	English	Peer-reviewed article	NA	Yes	Animalia	Arthropoda	Insecta	Hemiptera	Aleyrodidae	Bemisia	Bemisia tabaci		Tobacco whitefly	Terrestrial	terrestrial	N				North America	Mexico		Mexicali Valley	Site	1991-1992	Year	1991	1992	1992	1992	Potentially ongoing	16500000			2.88239e+07	4.66264e+07	16500000	2.88239e+07	4.66264e+07	USD	1992	Effective	Observed
1257	WoS	12815	Characterized and projected costs of nonindigenous species in Canada	Colautti et al		2006	English	Peer-reviewed article	NA	Yes	Animalia	Arthropoda	Insecta	Coleoptera	Curculionidae	Ceutorhynchus	Ceutorhynchus obstrictus		Seedpod weevil	Terrestrial	terrestrial					North America	Canada		Unspecified	Country	2002	Year	2002	Unspecified	2002	2002	Potentially ongoing	300000000	240000000	624000000	2.60506e+08	332551505	300000000	2.60506e+08	332551505	CAD	2002	Effective	Observed
1258	TC	546	Termites of the United States and their control	Su		1991	English	Official report	In Su 2002 and Su 1994	No	Animalia	Arthropoda	Insecta	Blattodea	Rhinotermitidae	Coptotermes	Coptotermes formosanus		Formosan termite	Terrestrial	terrestrial					North America	USA		Unspecified	Country	1991	Year	1991	Unspecified	1991	1991	Potentially ongoing	1000000000			1799813376	1799813376	1000000000	1799813376	1799813376	USD	1991	Publication year	Observed
1259	TC	442	Novel technologies for subterranean termite control	Su		2002	English	Peer-reviewed article	NA	Yes	Animalia	Arthropoda	Insecta	Blattodea	Rhinotermitidae	Coptotermes	Coptotermes formosanus		Formosan termite	Terrestrial	terrestrial					North America	USA		Unspecified	Country	2000	Year	2000	Unspecified	2000	2000	Potentially ongoing	11000000000			15658045393	15658045393	11000000000	15658045393	15658045393	USD	2000	Effective	Observed
1265	TC	497	Response model concept and economic impact	Morrison and Peairs		1998	English	Book	In Mohamed et al. 2000 Abundance and effects of predators and parasitoids on the Russian wheat aphid (Homoptera : Aphididae) under organic farming conditions in Colorado	No	Animalia	Arthropoda	Insecta	Hemiptera	Aphididae	Diuraphis	Diuraphis noxia		Russian wheat aphid	Terrestrial	terrestrial					North America	USA		Western USA	Site	1987-1993	Period	1987	1993	1987	1993	One-time	893100000			1342976125	1342976125	1.27586e+08	1.91854e+08	1.91854e+08	USD	1998	Publication year	Observed
1269	TC	256	Economic Analysis: Risk to US Apple, Grape, Orange and Pear Production from the Light Brown Apple Moth, Epiphyas postvittana (Walker)	Fowler et al		2009	English	Official report	Liebhold et al. 2012 Suckling & Brockerhoff 2010	No	Animalia	Arthropoda	Insecta	Lepidoptera	Tortricidae	Epiphyas	Epiphyas postvittana		Light brown apple moth	Terrestrial	terrestrial					North America	USA		Unspecified	Country	2009	Year	2009	Unspecified	2009	2009	Potentially ongoing	117751000			1.34537e+08	1.34537e+08	117751000	1.34537e+08	1.34537e+08	USD	2009	Publication year	Potential
1270	WoS	12815	Characterized and projected costs of nonindigenous species in Canada	Colautti et al		2006	English	Peer-reviewed article	NA	Yes	Animalia	Arthropoda	Insecta	Diptera	Muscidae	Haematobia	Haematobia irritans		Horn fly	Terrestrial	terrestrial					North America	Canada		Unspecified	Country	2002	Year	2002	Unspecified	2002	2002	Potentially ongoing	2550000000	2040000000	5304000000	2214299362	2826687792	2550000000	2214299362	2826687792	CAD	2002	Effective	Observed
1272	TC	346	Harmful Non-Indigenous Species in the United States	U.S. Congress, Office of Technology Assessment		1993	English	Official report	NA	Yes	Animalia	Arthropoda	Insecta	Lepidoptera	Erebidae	Lymantria	Lymantria dispar		Gypsy moth	Terrestrial	terrestrial					North America	USA		Continental USA	Country	1990-2004	Period	1990	2004	1990	2004	One-time	3100000000	2333333333	3866666667	5260137583	5260137583	2.06667e+08	3.50676e+08	3.50676e+08	USD	1993	Publication year	Potential
1273	WoS	12815	Characterized and projected costs of nonindigenous species in Canada	Colautti et al		2006	English	Peer-reviewed article	NA	Yes	Animalia	Arthropoda	Insecta	Lepidoptera	Erebidae	Lymantria	Lymantria dispar		Gypsy moth	Terrestrial	terrestrial					North America	Canada		Unspecified	Country	2002	Year	2002	Unspecified	2002	2002	Potentially ongoing	2401410000	1921128000	4994933000	2085270835	2661975032	2401410000	2085270835	2661975032	CAD	2002	Effective	Observed
1274	TC	508	Risk assessment in the face of a changing environment: Gypsy moth and climate change in Utah	Logan et al		2007	English	Peer-reviewed article	NA	Yes	Animalia	Arthropoda	Insecta	Lepidoptera	Erebidae	Lymantria	Lymantria dispar		Gypsy moth	Terrestrial	terrestrial					North America	USA		Utah	Site	Late 1980s-Early 1990s	Year	1985	1990	1985	1990	One-time	150000			177330	177330	150000	177330	177330	USD	2007	Publication year	Observed
1275	WoS	8142	The ecology, geopolitics, and economics of managing Lymantria dispar in the United States	Tobin et al		2012	English	Peer-reviewed article	NA	Yes	Animalia	Arthropoda	Insecta	Lepidoptera	Erebidae	Lymantria	Lymantria dispar		Gypsy moth	Terrestrial	terrestrial					North America	USA		Pennsylvania	Site	2008	Year	2008	Unspecified	2008	2008	Potentially ongoing	7700000			8.22069e+06	8.22069e+06	7700000	8.22069e+06	8.22069e+06	USD	2012	Publication year	Observed
1276	WoS	8142	The ecology, geopolitics, and economics of managing Lymantria dispar in the United States	Tobin et al		2012	English	Peer-reviewed article	NA	Yes	Animalia	Arthropoda	Insecta	Lepidoptera	Erebidae	Lymantria	Lymantria dispar		Gypsy moth	Terrestrial	terrestrial					North America	USA		Oregon/Washington	Site	2010	Year	2010	Unspecified	2010	2010	Potentially ongoing	2298000			2.4534e+06	2.4534e+06	2298000	2.4534e+06	2.4534e+06	USD	2012	Publication year	Observed
1277	WoS	8142	The ecology, geopolitics, and economics of managing Lymantria dispar in the United States	Tobin et al		2012	English	Peer-reviewed article	NA	Yes	Animalia	Arthropoda	Insecta	Lepidoptera	Erebidae	Lymantria	Lymantria dispar		Gypsy moth	Terrestrial	terrestrial					North America	USA		Oregon	Site	1981-2012	Period	1981	2012	1981	2012	One-time	9767000			1.04275e+07	1.04275e+07	305219	325858	325858	USD	2012	Publication year	Observed
1278	TC	198	Assessment of the economic feasibility of the gypsy moth Slow the Spread project	Sills		2007	English	Official report	Tobin, P. C., Bai, B. B., Eggen, D. A., & Leonard, D. S. (2012). The ecology, geopolitics, and economics of managing Lymantria dispar in the United States. International Journal of Pest Management, 58(3), 195–210. https://doi.org/10.1080/09670874.2011.647836	Yes	Animalia	Arthropoda	Insecta	Lepidoptera	Erebidae	Lymantria	Lymantria dispar		Gypsy moth	Terrestrial	terrestrial					North America	USA		Unspecified	Country	2007-2026	Period	2007	2026	2007	2026	Potentially ongoing	172500000	150000000	195000000	2.03929e+08	2.03929e+08	8625000	1.01964e+07	1.01964e+07	USD	2007	Effective	Potential
1279	TC	322	Fading Forests: North American Trees and the Threat of Exotic Pests	Campbell and Schlarbaum		1994	English	Official report	Pimentel et al 2005	Yes	Animalia	Arthropoda	Insecta	Lepidoptera	Erebidae	Lymantria	Lymantria dispar		Gypsy moth	Terrestrial	terrestrial					North America	USA		Unspecified	Country	1993	Year	1993	Unspecified	1993	1993	Potentially ongoing	10600000			1.79863e+07	1.79863e+07	10600000	1.79863e+07	1.79863e+07	USD	1993	Effective	Observed
1293	TC	567	The economics of insect control on wheat, corn, and canola in Canada, 1980–1985	Madder and Stemeroff		1988	English	Official report	Dosdall, L. M., Cárcamo, H., Olfert, O., Meers, S., Hartley, S., & Gavloski, J. (2011). Insect invasions of agroecosystems in the western Canadian prairies: case histories, patterns, and implications for ecosystem function. Biological Invasions, 13, 1135–1149. (ID8837)	Yes	Animalia	Arthropoda	Insecta	Lepidoptera	Plutellidae	Plutella	Plutella xylostella		Diamondback moth	Terrestrial	terrestrial					North America	Canada		Saskatchewan	Site	1980-1985	Period	1980	1985	1980	1985	Potentially ongoing	39400000			6.63571e+07	6.62004e+07	6.56667e+06	1.10595e+07	1.10334e+07	CAD	1988	Publication year	Potential
1294	TC	567	The economics of insect control on wheat, corn, and canola in Canada, 1980–1985	Madder and Stemeroff		1988	English	Official report	Dosdall, L. M., Cárcamo, H., Olfert, O., Meers, S., Hartley, S., & Gavloski, J. (2011). Insect invasions of agroecosystems in the western Canadian prairies: case histories, patterns, and implications for ecosystem function. Biological Invasions, 13, 1135–1149. (ID8837)	Yes	Animalia	Arthropoda	Insecta	Lepidoptera	Plutellidae	Plutella	Plutella xylostella		Diamondback moth	Terrestrial	terrestrial					North America	Canada		Alberta	Site	1985	Year	1985	1985	1985	1985	Potentially ongoing	789000			1328826	1.32569e+06	789000	1328826	1.32569e+06	CAD	1988	Publication year	Potential
1298	WoS	13244	Update on the environmental and economic costs associated with alien-invasive species in the United States	Pimentel et al		2005	English	Peer-reviewed article	NA	Yes	Animalia	Arthropoda	Insecta	Hymenoptera	Formicidae	Solenopsis	Solenopsis invicta		Red Imported Fire Ant	Terrestrial	terrestrial					North America	USA		Diverse/Unspecified	Country	2005	Year	2005	Unspecified	2005	2005	Potentially ongoing	300000000			7.53088e+08	7.53088e+08	600000000	7.53088e+08	7.53088e+08	USD	2005	Publication year	Observed
1299	WoS	13244	Update on the environmental and economic costs associated with alien-invasive species in the United States	Pimentel et al		2005	English	Peer-reviewed article	NA	Yes	Animalia	Arthropoda	Insecta	Hymenoptera	Formicidae	Solenopsis	Solenopsis invicta		Red Imported Fire Ant	Terrestrial	terrestrial					North America	USA		Diverse/Unspecified	Country	2005	Year	2005	Unspecified	2005	2005	Potentially ongoing	200000000			5.02058e+08	5.02058e+08	400000000	5.02058e+08	5.02058e+08	USD	2005	Publication year	Observed
1300	WoS	12815	Characterized and projected costs of nonindigenous species in Canada	Colautti et al		2006	English	Peer-reviewed article	NA	Yes	Animalia	Arthropoda	Insecta	Diptera	Anthomyiidae	Stomoxys	Stomoxys calcitrans		Stable fly	Terrestrial	terrestrial					North America	Canada		Unspecified	Country	2002	Year	2002	Unspecified	2002	2002	Potentially ongoing	3672000000	2040000000	5304000000	3188591081	4070430421	3672000000	3188591081	4070430421	CAD	2002	Effective	Observed
1302	WoS	12815	Characterized and projected costs of nonindigenous species in Canada	Colautti et al		2006	English	Peer-reviewed article	NA	Yes	Animalia	Arthropoda	Insecta	Coleoptera	Cerambycidae	Tetropium	Tetropium fuscum		Brown spruce longhorn beetle	Terrestrial	terrestrial					North America	Canada		Unspecified	Country	2002	Year	2002	Unspecified	2002	2002	Potentially ongoing	251510500	139728000	363293000	2.184e+08	278800651	251510500	2.184e+08	278800651	CAD	2002	Effective	Potential
1306	TC	397	Limits and Potentialities of Eradication as a Tool for Addressing Biological Invasions	Genovesi		2007	English	Peer-reviewed article	NA	Yes	Animalia	Arthropoda	Insecta	Coleoptera	Curculionidae	Hypera	Hypera postica		Alfalfa weevil	Terrestrial	terrestrial					North America	USA		Unspecified	Country	1968-1983	Period	1968	1983	1968	1983	One-time	1600000000			1891515203	1891515203	100000000	1.1822e+08	1.1822e+08	USD	2007	Publication year	Observed
1307	WoS	3132	Potential economic costs of invasive structural pests: conehead termites, Nasutitermes corniger, in Florida	Alvarez		2016	English	Peer-reviewed article	NA	Yes	Animalia	Arthropoda	Insecta	Blattodea	Termitidae	Nasutitermes	Nasutitermes corniger		Conehead termites	Terrestrial	terrestrial					North America	USA		Florida	Site	2015-2024	Period	2015	2024	2015	2024	Potentially ongoing	8400000	6900000	9900000	8.69746e+06	8.69746e+06	840000	869746	869746	USD	2014	Effective	Potential
1308	WoS	3132	Potential economic costs of invasive structural pests: conehead termites, Nasutitermes corniger, in Florida	Alvarez		2016	English	Peer-reviewed article	NA	Yes	Animalia	Arthropoda	Insecta	Blattodea	Termitidae	Nasutitermes	Nasutitermes corniger		Conehead termites	Terrestrial	terrestrial					North America	USA		Florida	Site	2014	Year	2014	Unspecified	2014	2014	Potentially ongoing	259826			269027	269027	259826	269027	269027	USD	2014	Effective	Observed
1309	TC	590	The Potential Economic Impacts of Emerald Ash Borer (Agrilus planipennis) on Ohio, US, Communities	Sydnor et al		2007	English	Peer-reviewed article	Alvarez, S. (2016). Potential economic costs of invasive structural pests: conehead termites, Nasutitermes corniger, in Florida. Journal of Environmental Planning and Management, 59(12), 2145–2162. https://doi.org/10.1080/09640568.2015.1130689	Yes	Animalia	Arthropoda	Insecta	Coleoptera	Buprestidae	Agrilus	Agrilus planipennis		Emerald ash borer	Terrestrial	terrestrial					North America	USA		Ohio	Site	Unspecified	Year	Unspecified	Unspecified	2007	2007	Potentially ongoing	2100000000	800000000	3400000000	2482613704	2482613704	2100000000	2482613704	2482613704	USD	2007	Publication year	Potential
1310	TC	590	The Potential Economic Impacts of Emerald Ash Borer (Agrilus planipennis) on Ohio, US, Communities	Sydnor et al		2007	English	Peer-reviewed article	Alvarez, S. (2016). Potential economic costs of invasive structural pests: conehead termites, Nasutitermes corniger, in Florida. Journal of Environmental Planning and Management, 59(12), 2145–2162. https://doi.org/10.1080/09640568.2015.1130689	Yes	Animalia	Arthropoda	Insecta	Coleoptera	Buprestidae	Agrilus	Agrilus planipennis		Emerald ash borer	Terrestrial	terrestrial					North America	USA		Ohio	Site	Unspecified	Year	Unspecified	Unspecified	2007	2007	One-time	1800000000	700000000	2900000000	2127954603	2127954603	1800000000	2127954603	2127954603	USD	2007	Publication year	Potential
1311	TC	590	The Potential Economic Impacts of Emerald Ash Borer (Agrilus planipennis) on Ohio, US, Communities	Sydnor et al		2007	English	Peer-reviewed article	Alvarez, S. (2016). Potential economic costs of invasive structural pests: conehead termites, Nasutitermes corniger, in Florida. Journal of Environmental Planning and Management, 59(12), 2145–2162. https://doi.org/10.1080/09640568.2015.1130689	Yes	Animalia	Arthropoda	Insecta	Coleoptera	Buprestidae	Agrilus	Agrilus planipennis		Emerald ash borer	Terrestrial	terrestrial					North America	USA		Ohio	Site	Unspecified	Year	Unspecified	Unspecified	2007	2007	Potentially ongoing	800000000	300000000	1300000000	9.45758e+08	9.45758e+08	800000000	9.45758e+08	9.45758e+08	USD	2007	Publication year	Potential
1312	TC	607	United States Department of Agriculture - Agriculture Research Service Research on Targeted Management of the Formosan Subterranean Termite Coptotermes formosanus Shiraki (Isoptera: Rhinotermitidae)	Lax and Osbrink		2003	English	Peer-reviewed article	Alvarez, S. (2016). Potential economic costs of invasive structural pests: conehead termites, Nasutitermes corniger, in Florida. Journal of Environmental Planning and Management, 59(12), 2145–2162. https://doi.org/10.1080/09640568.2015.1130689	Yes	Animalia	Arthropoda	Insecta	Blattodea	Rhinotermitidae	Coptotermes	Coptotermes formosanus		Formosan termite	Terrestrial	terrestrial					North America	USA		Unspecified	Country	2003	Year	2003	Unspecified	2003	2003	Potentially ongoing	1000000000			1332473386	1332473386	1000000000	1332473386	1332473386	USD	2003	Publication year	Observed
1314	TC	521	Spotted wing drosophila: adding cost to fruit production	Werts and Green		2014	English	Official report	In Benito, N. P., Lopes-da-Silva, M., & dos Santos, R. S. S. (2016). Potential spread and economic impact of invasive Drosophila suzukii in Brazil. Pesquisa Agropecuaria Brasileira, 51(5), 571–578. https://doi.org/10.1590/S0100-204X20160005000018	Yes	Animalia	Arthropoda	Insecta	Diptera	Lauxaniidae	Drosophila	Drosophila suzukii		Spotted Wing Drosophila	Terrestrial	terrestrial					North America	USA		Oregon	Site	2013	Year	2013	Unspecified	2013	2013	Potentially ongoing	14000000			1.47309e+07	1.47309e+07	14000000	1.47309e+07	1.47309e+07	USD	2013	Effective	Observed
1318	WoS	8414	IPM program development for an invasive pest: Coordination, outreach and evaluation	Dreves		2011	English	Peer-reviewed article	NA	Yes	Animalia	Arthropoda	Insecta	Diptera	Lauxaniidae	Drosophila	Drosophila suzukii		Spotted Wing Drosophila	Terrestrial	terrestrial					North America	USA		Oregon	Site	6 months (2010)	Year	2010	2010	2010	2010	One-time	225000			252926	252926	225000	252926	252926	USD	2010	Effective	Observed
1319	WoS	8414	IPM program development for an invasive pest: Coordination, outreach and evaluation	Dreves		2011	English	Peer-reviewed article	NA	Yes	Animalia	Arthropoda	Insecta	Diptera	Lauxaniidae	Drosophila	Drosophila suzukii		Spotted Wing Drosophila	Terrestrial	terrestrial					North America	USA		Oregon	Site	2010	Year	2010	2010	2010	2010	One-time	5800000			6.51987e+06	6.51987e+06	5800000	6.51987e+06	6.51987e+06	USD	2010	Effective	Observed
1330	TC	376	Invasion of California by exotic pests	Metcalf		1995	English	Peer-reviewed article	Lara, J., Pickett, C., Ingels, C., Haviland, D. R., Grafton-Cardwell, E., Doll, D., … Hoddle, M. (2016). Biological control program is being developed for brown marmorated stink bug. California Agriculture, 70(1), 15–23. https://doi.org/10.3733/ca.v070n01p15	Yes	Animalia	Arthropoda	Insecta	Hemiptera	Aleyrodidae	Bemisia	Bemisia tabaci		Tobacco whitefly	Terrestrial	terrestrial					North America	USA		California	Site	1995	Year	1995	Unspecified	1995	1995	Potentially ongoing	130000000			2.09114e+08	2.09114e+08	130000000	2.09114e+08	2.09114e+08	USD	1995	Publication year	Observed
1331	TC	376	Invasion of California by exotic pests	Metcalf		1995	English	Peer-reviewed article	Lara, J., Pickett, C., Ingels, C., Haviland, D. R., Grafton-Cardwell, E., Doll, D., … Hoddle, M. (2016). Biological control program is being developed for brown marmorated stink bug. California Agriculture, 70(1), 15–23. https://doi.org/10.3733/ca.v070n01p15	Yes	Animalia	Arthropoda	Insecta	Diptera	Tephritidae	Ceratitis	Ceratitis capitata		Mediterranean fruit fly	Terrestrial	terrestrial					North America	USA		California	Site	1995	Year	1995	Unspecified	1995	1995	Potentially ongoing	1000000000			1608572132	1608572132	1000000000	1608572132	1608572132	USD	1995	Publication year	Potential
1332	TC	376	Invasion of California by exotic pests	Metcalf		1995	English	Peer-reviewed article	Lara, J., Pickett, C., Ingels, C., Haviland, D. R., Grafton-Cardwell, E., Doll, D., … Hoddle, M. (2016). Biological control program is being developed for brown marmorated stink bug. California Agriculture, 70(1), 15–23. https://doi.org/10.3733/ca.v070n01p15	Yes	Animalia	Arthropoda	Insecta	Hymenoptera	Apidae	Apis	Apis mellifera		Africanized honeybee	Terrestrial	terrestrial					North America	USA		California	Site	1995	Year	1995	Unspecified	1995	1995	Potentially ongoing	1800000000			2895429837	2895429837	1800000000	2895429837	2895429837	USD	1995	Publication year	Observed
1333	TC	376	Invasion of California by exotic pests	Metcalf		1995	English	Peer-reviewed article	Lara, J., Pickett, C., Ingels, C., Haviland, D. R., Grafton-Cardwell, E., Doll, D., … Hoddle, M. (2016). Biological control program is being developed for brown marmorated stink bug. California Agriculture, 70(1), 15–23. https://doi.org/10.3733/ca.v070n01p15	Yes	Animalia	Arthropoda	Insecta	Diverse/Unspecified	Diverse/Unspecified	Diverse/Unspecified	Diverse/Unspecified		Diverse pest insects	Terrestrial	terrestrial					North America	USA		California	Site	1995	Year	1995	Unspecified	1995	1995	Potentially ongoing	1000000000			1608572132	1608572132	1000000000	1608572132	1608572132	USD	1995	Publication year	Observed
1335	TC	540	SWD Impacts, 2013	Burrack		2013	English	Web page	In Little, C. M., Chapman, T. W., Moreau, D. L., & Hillier, N. K. (2017). Susceptibility of selected boreal fruits and berries to the invasive pest Drosophila suzukii (Diptera: Drosophilidae). Pest Management Science, 73(1), 160–166. https://doi.org/10.1002/ps.4366	Yes	Animalia	Arthropoda	Insecta	Diptera	Lauxaniidae	Drosophila	Drosophila suzukii		Spotted Wing Drosophila	Terrestrial	terrestrial					North America	USA		Unspecified	Country	2013	Year	2013	Unspecified	2013	2013	Potentially ongoing	27558238			2.8997e+07	2.8997e+07	27558238	2.8997e+07	2.8997e+07	USD	2013	Effective	Observed
1336	WoS	2250	Predicting the total economic impacts of invasive species: The case of B. rubostriata (red streaked leafhopper)	Liu and Piper		2016	English	Peer-reviewed article	NA	Yes	Animalia	Arthropoda	Insecta	Hemiptera	Cicadellidae	Balclutha	Balclutha rubrostriatus		red streaked leafhopper	Terrestrial	terrestrial					North America	USA		Louisiana	Site	5 years	Period	2016	2021	2016	2021	Potentially ongoing	38500000	5400000	71600000	4.05101e+07	4.05101e+07	7700000	8.10201e+06	8.10201e+06	USD	2013	Effective	Potential
1337	WoS	9875	The effect of Africanized honey bees on honey production in the United States: An informational approach	Livanis and Moss		2010	English	Peer-reviewed article	NA	Yes	Animalia	Arthropoda	Insecta	Hymenoptera	Apidae	Apis	Apis mellifera		Africanized honeybee	Terrestrial	terrestrial					North America	USA		Unspecified	Country	2010	Year	2010	Unspecified	2010	2010	Potentially ongoing	43500000	29000000	58000000	4.8899e+07	4.8899e+07	43500000	4.8899e+07	4.8899e+07	USD	2010	Publication year	Observed
1338	TC	531	Status of Pollinators in North America	National Research Council		2007	English	Book	Livanis, G., & Moss, C. B. (2010). The effect of Africanized honey bees on honey production in the United States: An informational approach. Ecological Economics, 69(4), 895–904. https://doi.org/10.1016/j.ecolecon.2009.11.013	No	Animalia	Arthropoda	Arachnida	Mesostigmata	Varroidae	Varroa	Varroa destructor		Varroa mite	Terrestrial	terrestrial					North America	USA		Unspecified	Country	2007	Year	2007	Unspecified	2007	2007	Potentially ongoing	30000000			3.54659e+07	3.54659e+07	30000000	3.54659e+07	3.54659e+07	USD	2007	Publication year	Observed
1339	WoS	9875	The effect of Africanized honey bees on honey production in the United States: An informational approach	Livanis and Moss		2010	English	Peer-reviewed article	NA	Yes	Animalia	Arthropoda	Insecta	Hymenoptera	Apidae	Apis	Apis mellifera		Africanized honeybee	Terrestrial	terrestrial					North America	USA		California	Site	2007	Year	2007	Unspecified	2007	2007	Potentially ongoing	2310880000			2731915408	2731915408	2310880000	2731915408	2731915408	USD	2007	Effective	Observed
1340	TC	335	For gardeners, stink bugs are not a problem to sniff at	Lloyd		2011	English	Newspaper	Martinson, H. M., Raupp, M. J., & Shrewsbury, P. M. (2013). Invasive Stink Bug Wounds Trees, Liberates Sugars, and Facilitates Native Hymenoptera. Annals of the Entomological Society of America, 106(1), 47–52. https://doi.org/10.1603/AN12088	Yes	Animalia	Arthropoda	Insecta	Hemiptera	Pentatomidae	Halyomorpha	Halyomorpha halys		brown marmorated stink bug	Terrestrial	terrestrial					North America	USA		Mid-Atlantic region	Site	2011	Year	2011	Unspecified	2011	2011	Potentially ongoing	37000000			4.03195e+07	4.03195e+07	37000000	4.03195e+07	4.03195e+07	USD	2011	Publication year	Observed
1344	TC	278	Economic impact of the Russian wheat aphid in the western United States, 1988- 1989	Hein et al		1990	English	Official report	Skvarla, M. J., Halbert, S. E., Foottit, R. G., Jensen, A. S., Maw, E., & Miller, G. L. (2017). An Update to the Adventive Aphids (Hemiptera: Aphidoidea) of America North of Mexico, with Notes on Intercepted Species. Proceedings of the Entomological Society of Washington, 119(1), 90–111. https://doi.org/10.4289/0013-8797.119.1.90	No	Animalia	Arthropoda	Insecta	Hemiptera	Aphididae	Diuraphis	Diuraphis noxia		Russian wheat aphid	Terrestrial	terrestrial					North America	USA		Unspecified	Country	1987-1989	Period	1987	1989	1987	1989	One-time	276000000			5.17786e+08	5.17786e+08	92000000	1.72595e+08	1.72595e+08	USD	1990	Publication year	Observed
1345	TC	435	Natural enemies of Russian wheat aphid identified in California	Bernal et al		1993	English	Peer-reviewed article	Skvarla, M. J., Halbert, S. E., Foottit, R. G., Jensen, A. S., Maw, E., & Miller, G. L. (2017). An Update to the Adventive Aphids (Hemiptera: Aphidoidea) of America North of Mexico, with Notes on Intercepted Species. Proceedings of the Entomological Society of Washington, 119(1), 90–111. https://doi.org/10.4289/0013-8797.119.1.90	Yes	Animalia	Arthropoda	Insecta	Hemiptera	Aphididae	Diuraphis	Diuraphis noxia		Russian wheat aphid	Terrestrial	terrestrial					North America	USA		16 Western states	Site	1986-1993	Period	1986	1993	1986	1993	Potentially ongoing	500000000			8.48409e+08	8.48409e+08	62500000	106051161	106051161	USD	1993	Publication year	Observed
1346	TC	435	Natural enemies of Russian wheat aphid identified in California	Bernal et al		1993	English	Peer-reviewed article	Skvarla, M. J., Halbert, S. E., Foottit, R. G., Jensen, A. S., Maw, E., & Miller, G. L. (2017). An Update to the Adventive Aphids (Hemiptera: Aphidoidea) of America North of Mexico, with Notes on Intercepted Species. Proceedings of the Entomological Society of Washington, 119(1), 90–111. https://doi.org/10.4289/0013-8797.119.1.90	Yes	Animalia	Arthropoda	Insecta	Hemiptera	Aphididae	Diuraphis	Diuraphis noxia		Russian wheat aphid	Terrestrial	terrestrial					North America	USA		California	Site	1988-1989	Year	1988	1989	1989	1989	Potentially ongoing	8000000			1.35745e+07	1.35745e+07	8000000	1.35745e+07	1.35745e+07	USD	1993	Publication year	Observed
1347	TC	477	Profitability analysis of soybean aphid control treatments in three northcentral states. Michigan State University Department of Agriculture Economics	Song et al		2006	English	Official report	In Skvarla, M. J., Halbert, S. E., Foottit, R. G., Jensen, A. S., Maw, E., & Miller, G. L. (2017). An Update to the Adventive Aphids (Hemiptera: Aphidoidea) of America North of Mexico, with Notes on Intercepted Species. Proceedings of the Entomological Society of Washington, 119(1), 90–111. https://doi.org/10.4289/0013-8797.119.1.90	Yes	Animalia	Arthropoda	Insecta	Hemiptera	Aphididae	Aphis	Aphis glycines		Soybean aphid	Terrestrial	terrestrial					North America	USA		NorthCentral USA	Site	2004	Year	2004	Unspecified	2004	2004	Potentially ongoing	2400000000			3114552193	3114552193	2400000000	3114552193	3114552193	USD	2004	Effective	Observed
1348	TC	477	Profitability analysis of soybean aphid control treatments in three northcentral states. Michigan State University Department of Agriculture Economics	Song et al		2006	English	Official report	In Skvarla, M. J., Halbert, S. E., Foottit, R. G., Jensen, A. S., Maw, E., & Miller, G. L. (2017). An Update to the Adventive Aphids (Hemiptera: Aphidoidea) of America North of Mexico, with Notes on Intercepted Species. Proceedings of the Entomological Society of Washington, 119(1), 90–111. https://doi.org/10.4289/0013-8797.119.1.90	Yes	Animalia	Arthropoda	Insecta	Hemiptera	Aphididae	Aphis	Aphis glycines		Soybean aphid	Terrestrial	terrestrial					North America	USA		Michigan	Unit (Acre)	2004	Year	2004	Unspecified	2004	2004	Potentially ongoing	10	8	12	12.98	12.98	10	12.98	12.98	USD	2004	Effective	Observed
1349	TC	477	Profitability analysis of soybean aphid control treatments in three northcentral states. Michigan State University Department of Agriculture Economics	Song et al		2006	English	Official report	In Skvarla, M. J., Halbert, S. E., Foottit, R. G., Jensen, A. S., Maw, E., & Miller, G. L. (2017). An Update to the Adventive Aphids (Hemiptera: Aphidoidea) of America North of Mexico, with Notes on Intercepted Species. Proceedings of the Entomological Society of Washington, 119(1), 90–111. https://doi.org/10.4289/0013-8797.119.1.90	Yes	Animalia	Arthropoda	Insecta	Hemiptera	Aphididae	Aphis	Aphis glycines		Soybean aphid	Terrestrial	terrestrial					North America	USA		Michigan/Iowa/Minnesota	Unit (Ha)	2005	Year	2005	Unspecified	2005	2005	Potentially ongoing	16.3	2	30.58	20.45	20.45	16.29	20.45	20.45	USD	2005	Effective	Observed
1350	WoS	436	Expected Timber-Based Economic Impacts of a Wood-Boring Beetle (Acanthotomicus Sp.) That Kills American Sweetgum	Susaeta et al		2017	English	Peer-reviewed article	NA	Yes	Animalia	Arthropoda	Insecta	Coleoptera	Curculionidae	Acanthotomicus	Acanthotomicus sp.		Wood-boring beetle	Terrestrial	terrestrial					North America	USA		Southern USA	Site	2017	Year	2017	Unspecified	2017	2017	Potentially ongoing	4600000			4600000	4600000	4600000	4600000	4600000	USD	2017	Publication year	Potential
1360	TC	610	USDA Expands emerald ash borer quarantine in Illinois, Indiana and Ohio	Lucik and Redding		2006	English	Official report	Hausman, C. E., Jaeger, J. F., & Rocha, O. J. (2010). Impacts of the emerald ash borer (EAB) eradication and tree mortality: Potential for a secondary spread of invasive plant species. Biological Invasions, 12(7), 2013–2023. https://doi.org/10.1007/s10530-009-9604-3 (SCHOLAR)	No	Animalia	Arthropoda	Insecta	Coleoptera	Buprestidae	Agrilus	Agrilus planipennis		Emerald ash borer	Terrestrial	terrestrial					North America	USA		Unspecified	Country	2006	Year	2006	Unspecified	2006	2006	Potentially ongoing	100000000			121592121	121592121	100000000	121592121	121592121	USD	2006	Effective	Observed
1361	TC	387	Is devastating whitefly invader really a new species?	Barinaga		1993	English	Peer-reviewed article	Wan, F., Zhang, G., Liu, S., Luo, C., Chu, D., Zhang, Y., … Zhang, Y. (2009). Invasive mechanism and management strategy of Bemisia tabaci (Gennadius) biotype B: Progress report of 973 Program on invasive alien species in China. Science in China, Series C: Life Sciences, 52(1), 88–95. https://doi.org/10.1007/s11427-008-0135-4	Yes	Animalia	Arthropoda	Insecta	Coleoptera	Buprestidae	Agrilus	Agrilus planipennis		Emerald ash borer	Terrestrial	terrestrial					North America	USA		Florida/California/Texas	Site	1991-1992	Year	1991	1992	1992	1992	Potentially ongoing	175000000	100000000	250000000	2.96943e+08	2.96943e+08	175000000	2.96943e+08	2.96943e+08	USD	1993	Publication year	Observed
1364	TC	463	Pink bollworm eradication plan in the U.S. United States Department of Agriculture	Grefenstette et al		2009	English	Official report	Gutierrez, A. P., & Ponti, L. (2013). Eradication of Invasive Species: Why the Biology Matters. Environmental Entomology, 42(3), 395–411. https://doi.org/10.1603/EN12018	Yes	Animalia	Arthropoda	Insecta	Lepidoptera	Gelechiidae	Pectinophora	Pectinophora gossypiella		Pink bollworm	Terrestrial	terrestrial					North America	USA		California/Arizona	Site	Past 30 years (from 2013 = publication year)	Period	1979	2009	1979	2009	One-time	1200000			1.37106e+06	1.37106e+06	40000	45702.1	45702.1	USD	2009	Publication year	Observed
1365	TC	464	Pink Bollworm Eradication: A Window of Opportunity	National Cotton Council		2001	English	Official report	Grefenstette, B., O. El-Lissy, and R. T. Staten. 2009. Pink bollworm eradication plan in the U.S. United States Department of Agriculture, (http://www.aphis.usda.gov/ plant_health/plant_pest_info/cotton_pests/downloads/pbw-erad-plan2-09.pdf	Yes	Animalia	Arthropoda	Insecta	Lepidoptera	Gelechiidae	Pectinophora	Pectinophora gossypiella		Pink bollworm	Terrestrial	terrestrial					North America	USA		Unspecified	Country	2001	Year	2001	Unspecified	2001	2001	Potentially ongoing	21600000			2.99016e+07	2.99016e+07	21600000	2.99016e+07	2.99016e+07	USD	2001	Publication year	Observed
1369	GS	89	Eradication of Invasive Species: Why the Biology Matters	Gutierrez and Ponti		2013	English	Peer-reviewed article	NA	Yes	Animalia	Arthropoda	Insecta	Diptera	Calliphoridae	Cochliomyia	Cochliomyia hominivorax		New world screwworm	Terrestrial	terrestrial					North America	USA		Unspecified	Country	Unspecified	Year	Unspecified	Unspecified	2013	2013	One-time	750000000			7.89157e+08	7.89157e+08	750000000	7.89157e+08	7.89157e+08	USD	2013	Publication year	Potential
1370	TC	374	Introduction to the Problem of Invasive Exotic Plant Species	Pennsylvania Department of Conservation and Natural Resources		2005	English	Official report	Krcmar, E. (2008). An examination of the threats and risks to forests arising from invasive alien species. Information Report - Pacific Forestry Centre, Canadian Forest Service.	No	Animalia	Arthropoda	Insecta	Hemiptera	Adelgidae	Adelges	Adelges tsugae		Hemlock woolly adelgid	Terrestrial	terrestrial					North America	USA		Pennsylvania	Site	2005	Year	2005	Unspecified	2005	2005	Potentially ongoing	400000			502058	502058	400000	502058	502058	USD	2005	Effective	Observed
1371	TC	374	Introduction to the Problem of Invasive Exotic Plant Species	Pennsylvania Department of Conservation and Natural Resources		2005	English	Official report	Krcmar, E. (2008). An examination of the threats and risks to forests arising from invasive alien species. Information Report - Pacific Forestry Centre, Canadian Forest Service.	No	Animalia	Arthropoda	Insecta	Hemiptera	Adelgidae	Adelges	Adelges tsugae		Hemlock woolly adelgid	Terrestrial	terrestrial					North America	USA		Pennsylvania	Site	2005	Year	2005	Unspecified	2005	2005	Potentially ongoing	250000			313787	313787	250000	313787	313787	USD	2005	Effective	Observed
1372	TC	462	Pest risk assessment of the importation of larch from Siberia and the Soviet Far East	USDA FS		1991	English	Official report	Krcmar, E. (2008). An examination of the threats and risks to forests arising from invasive alien species. Information Report - Pacific Forestry Centre, Canadian Forest Service.	Yes	Animalia	Arthropoda	Insecta	Diverse/Unspecified	Diverse/Unspecified	Diverse/Unspecified	Diverse/Unspecified		Insect defoliators	Terrestrial	terrestrial					North America	USA		Unspecified	Country	1990-2040	Period	1990	2040	1990	2040	Potentially ongoing	46730000000	35050000000	58410000000	87667107309	87667107309	9.16275e+08	1718962888	1718962888	USD	1990	Effective	Potential
1373	TC	462	Pest risk assessment of the importation of larch from Siberia and the Soviet Far East	USDA FS		1991	English	Official report	Krcmar, E. (2008). An examination of the threats and risks to forests arising from invasive alien species. Information Report - Pacific Forestry Centre, Canadian Forest Service.	Yes	Animalia	Nematoda	Secernentea	Aphelenchida	Aphelenchidae	Bursaphelenchus	Bursaphelenchus mucronatus		Wood nematode	Terrestrial	terrestrial					North America	USA		Unspecified	Country	1990-2040	Period	1990	2040	1990	2040	Potentially ongoing	17510000000	1670000000	33350000000	32849369762	32849369762	3.43333e+08	6.44105e+08	6.44105e+08	USD	1990	Effective	Potential
1374	TC	462	Pest risk assessment of the importation of larch from Siberia and the Soviet Far East	USDA FS		1991	English	Official report	Krcmar, E. (2008). An examination of the threats and risks to forests arising from invasive alien species. Information Report - Pacific Forestry Centre, Canadian Forest Service.	Yes	Animalia	Arthropoda	Insecta	Coleoptera	Curculionidae	Ips	Ips typographus		Spruce bark bettle	Terrestrial	terrestrial					North America	USA		Unspecified	Country	1990-2040	Period	1990	2040	1990	2040	Potentially ongoing	43375500000	10251000000	76500000000	81373948493	81373948493	850500000	1595567618	1595567618	USD	1990	Effective	Potential
1375	TC	591	The potential impacts of exotic forest pests in North America: a synthesis of research	Krcmar-Nozic et al		2000	English	Official report	NA	Yes	Animalia	Diverse/Unspecified	Diverse/Unspecified	Diverse/Unspecified	Diverse/Unspecified	Diverse/Unspecified	Diverse/Unspecified		Diverse (insects/pathogenes)	Terrestrial	terrestrial					North America	USA		Unspecified	Country	Unspecified	Year	Unspecified	Unspecified	2000	2000	Potentially ongoing	29000000			4.26743e+07	4.26743e+07	29000000	4.26743e+07	4.26743e+07	USD	1999	Effective	Observed
1376	TC	591	The potential impacts of exotic forest pests in North America: a synthesis of research	Krcmar-Nozic et al		2000	English	Official report	NA	Yes	Animalia	Diverse/Unspecified	Diverse/Unspecified	Diverse/Unspecified	Diverse/Unspecified	Diverse/Unspecified	Diverse/Unspecified		Diverse (insects/pathogenes)	Terrestrial	terrestrial					North America	Canada		Unspecified	Country	Unspecified	Year	Unspecified	Unspecified	2000	2000	Potentially ongoing	720000000			6.90111e+08	8.349e+08	720000000	6.90111e+08	8.349e+08	CAD	2000	Publication year	Observed
1377	GS	149	Invasive pests ('biological pollutants') and US forests: whose problem, who pays?	Wallner		1996	English	Peer-reviewed article	NA	Yes	Animalia	Arthropoda	Insecta	Lepidoptera	Erebidae	Lymantria	Lymantria dispar		European gypsy moth	Terrestrial	terrestrial					North America	USA		Pennsylvania	Site	1981	Year	1981	Unspecified	1981	1981	Potentially ongoing	9000000			2.42626e+07	2.42626e+07	9000000	2.42626e+07	2.42626e+07	USD	1981	Effective	Observed
1378	GS	149	Invasive pests ('biological pollutants') and US forests: whose problem, who pays?	Wallner		1996	English	Peer-reviewed article	NA	Yes	Animalia	Arthropoda	Insecta	Lepidoptera	Erebidae	Lymantria	Lymantria dispar		European gypsy moth	Terrestrial	terrestrial					North America	USA		Pennsylvania	Site	1981	Year	1981	Unspecified	1981	1981	Potentially ongoing	72000000			1.94101e+08	1.94101e+08	72000000	1.94101e+08	1.94101e+08	USD	1981	Effective	Observed
1379	GS	149	Invasive pests ('biological pollutants') and US forests: whose problem, who pays?	Wallner		1996	English	Peer-reviewed article	NA	Yes	Animalia	Arthropoda	Insecta	Lepidoptera	Erebidae	Lymantria	Lymantria dispar		European gypsy moth	Terrestrial	terrestrial					North America	USA		Unspecified	Country	1980-1994	Year	1980	1994	1980	1994	One-time	30000000			4.82572e+07	4.82572e+07	30000000	4.82572e+07	4.82572e+07	USD	1995	Effective	Observed
1380	TC	391	Krcmar-Nozic et al	Mastro		1996	English	Official report	NA	Yes	Animalia	Arthropoda	Insecta	Lepidoptera	Erebidae	Lymantria	Lymantria dispar		European gypsy moth	Terrestrial	terrestrial					North America	USA		Unspecified	Country	1995	Year	1995	Unspecified	1995	1995	Potentially ongoing	8000000			1.28686e+07	1.28686e+07	8000000	1.28686e+07	1.28686e+07	USD	1995	Effective	Observed
1382	GS	149	Invasive pests ('biological pollutants') and US forests: whose problem, who pays?	Wallner		1996	English	Peer-reviewed article	NA	Yes	Animalia	Arthropoda	Insecta	Lepidoptera	Erebidae	Lymantria	Lymantria dispar		Asian gypsy moth	Terrestrial	terrestrial					North America	USA		North Carolina/South Carolina	Site	1994-1995	Year	1994	1995	1995	1995	One-time	4500000			7.23857e+06	7.23857e+06	4500000	7.23857e+06	7.23857e+06	USD	1995	Effective	Observed
1383	TC	270	Economic evaluation of gypsy moth damage in the United States of America	Gottschalk		1990	English	Official report	Krcmar-Nozic, E., Wilson, B., & Arthur, L. (2000). The potential impacts of exotic forest pests in North America: a synthesis of research. Information Report BC-X-387.	No	Animalia	Arthropoda	Insecta	Lepidoptera	Erebidae	Lymantria	Lymantria dispar		European gypsy moth	Terrestrial	terrestrial					North America	USA		Pennsylvania	Site	1969-1988	Period	1969	1988	1969	1988	Potentially ongoing	4380000000			8217032528	8217032528	219000000	4.10852e+08	4.10852e+08	USD	1990	Effective	Observed
1385	TC	346	Harmful Non-Indigenous Species in the United States	﻿Office of Technology Assessment		1993	English	Official report	Krcmar-Nozic, E., Wilson, B., & Arthur, L. (2000). The potential impacts of exotic forest pests in North America: a synthesis of research. Information Report BC-X-387.	Yes	Animalia	Arthropoda	Insecta	Lepidoptera	Erebidae	Lymantria	Lymantria dispar		Asian gypsy moth	Terrestrial	terrestrial					North America	USA		Pacific Northwest	Site	Unspecified	Year	Unspecified	Unspecified	1993	1993	One-time	17000000	14000000	20000000	2.88459e+07	2.88459e+07	17000000	2.88459e+07	2.88459e+07	USD	1993	Publication year	Observed
1386	TC	346	Harmful Non-Indigenous Species in the United States	U.S. Congress, Office of Technology Assessment		1993	English	Official report	Krcmar-Nozic, E., Wilson, B., & Arthur, L. (2000). The potential impacts of exotic forest pests in North America: a synthesis of research. Information Report BC-X-387.	Yes	Animalia	Arthropoda	Insecta	Diverse/Unspecified	Diverse/Unspecified	Diverse/Unspecified	Diverse/Unspecified			Terrestrial	terrestrial					North America	USA		Unspecified	Country	1906-1991	Period	1906	1991	1906	1991	Potentially ongoing	93748094118			166767000000	166767000000	1077418605	1939152416	1939152416	USD	1991	Effective	Observed
1387	TC	346	Harmful Non-Indigenous Species in the United States	﻿Office of Technology Assessment		1993	English	Official report	Krcmar-Nozic, E., Wilson, B., & Arthur, L. (2000). The potential impacts of exotic forest pests in North America: a synthesis of research. Information Report BC-X-387.	Yes	Animalia	Arthropoda	Insecta	Coleoptera/Diptera/Hymenoptera/Lepidoptera	Apidae/Curculionidae/Erebidae/Tephritidae	Anthonomus/Apis/Ceratitis/Ips/Lymantria	Anthonomus grandis/Apis mellifera/Ceratitis capitata/Ips typographus/Lymantria dispar/Lymantria monacha		African honey bee/Boll weevil/Mediterranean fruit fly/Spruce bark beetles/Asian gypsy moth/Nun moth	Terrestrial	terrestrial					North America	USA		Unspecified	Country	50 years	Period	1993	2043	1993	2043	Potentially ongoing	73739000000			132716000000	132716000000	1474780000	2654328770	2654328770	USD	1991	Effective	Potential
1388	TC	346	Harmful Non-Indigenous Species in the United States	U.S. Congress, Office of Technology Assessment		1993	English	Official report	NA	Yes	Animalia	Arthropoda	Insecta	Lepidoptera	Erebidae	Lymantria	Lymantria dispar		European gypsy moth	Terrestrial	terrestrial					North America	USA		Eastern USA	Site	1987-1991	Year	1987	1991	1987	1991	One-time	10322000			1.75146e+07	1.75146e+07	10322000	1.75146e+07	1.75146e+07	USD	1993	Publication year	Observed
1389	TC	346	Harmful Non-Indigenous Species in the United States	U.S. Congress, Office of Technology Assessment		1993	English	Official report	NA	Yes	Animalia	Arthropoda	Insecta	Diverse/Unspecified	Diverse/Unspecified	Diverse/Unspecified	Diverse/Unspecified			Terrestrial	terrestrial					North America	USA		North Carolina/South Carolina	Site	1991	Year	1991	1991	1991	1991	One-time	5200000			9.35903e+06	9.35903e+06	5200000	9.35903e+06	9.35903e+06	USD	1991	Effective	Observed
1390	TC	440	Non-Indigenous Species in the United States: Economic Consequences	Cochran		1992	English	Official report	OTA. (1993). Harmful Non-Indigenous Species in the United States. Ota-F-565, (September). Retrieved from https://www.anstaskforce.gov/Documents/OTA_Report_1993.pdf	No	Animalia	Arthropoda	Insecta	Hemiptera	Aphididae	Diuraphis	Diuraphis noxia		Russian wheat aphid	Terrestrial	terrestrial					North America	USA		Unspecified	Country	1987-1989	Year	1987	1989	1987	1989	Potentially ongoing	300000000			5.39944e+08	5.39944e+08	300000000	5.39944e+08	5.39944e+08	USD	1991	Effective	Observed
1391	TC	440	Non-Indigenous Species in the United States: Economic Consequences	Cochran		1992	English	Official report	OTA. (1993). Harmful Non-Indigenous Species in the United States. Ota-F-565, (September). Retrieved from https://www.anstaskforce.gov/Documents/OTA_Report_1993.pdf	No	Animalia	Arthropoda	Insecta	Coleoptera	Curculionidae	Anthonomus	Anthonomus grandis		Boll weevil	Terrestrial	terrestrial					North America	USA		Unspecified	Country	1909-1949	Period	1909	1949	1909	1949	Potentially ongoing	50000000000			3689620000000	3689620000000	50000000000	89990668788	89990668788	USD	1991	Effective	Observed
1392	TC	300	Eradication of Introduced Arthropod Pests: Theory and Historical Practice	Klassen		1989	English	Book	OTA. (1993). Harmful Non-Indigenous Species in the United States. Ota-F-565, (September). Retrieved from https://www.anstaskforce.gov/Documents/OTA_Report_1993.pdf	No	Animalia	Arthropoda	Insecta	Diptera	Tephritidae	Ceratitis	Ceratitis capitata		Mediterranean fruit fly	Terrestrial	terrestrial					North America	USA		California	Site	Unspecified	Year	Unspecified	Unspecified	1989	1989	Potentially ongoing	897000000			1773640223	1773640223	897000000	1773640223	1773640223	USD	1989	Publication year	Potential
1393	TC	396	Letters to Office of Technology Assessment, Dec. 9, 1991 and Jan. 7, 1992, with attachment summarizing information from the APHIS Fiscal Year 1990 Budget Witness Book	Evangelou		1992	English	Official report	OTA. (1993). Harmful Non-Indigenous Species in the United States. Ota-F-565, (September). Retrieved from https://www.anstaskforce.gov/Documents/OTA_Report_1993.pdf	No	Animalia	Arthropoda	Insecta	Coleoptera	Curculionidae	Hypera	Hypera postica		Alfalfa weevil	Terrestrial	terrestrial					North America	USA		Unspecified	Country	1990	Year	1990	Unspecified	1990	1990	Potentially ongoing	500000000			9.38017e+08	9.38017e+08	500000000	9.38017e+08	9.38017e+08	USD	1990	Effective	Observed
1394	TC	396	Letters to Office of Technology Assessment, Dec. 9, 1991 and Jan. 7, 1992, with attachment summarizing information from the APHIS Fiscal Year 1990 Budget Witness Book	Evangelou		1992	English	Official report	OTA. (1993). Harmful Non-Indigenous Species in the United States. Ota-F-565, (September). Retrieved from https://www.anstaskforce.gov/Documents/OTA_Report_1993.pdf	No	Animalia	Arthropoda	Insecta	Hemiptera	Aphididae	Diuraphis	Diuraphis noxia		Russian wheat aphid	Terrestrial	terrestrial					North America	USA		Unspecified	Country	1988	Year	1988	Unspecified	1988	1988	Potentially ongoing	172800000			358170649	358170649	172800000	358170649	358170649	USD	1988	Effective	Observed
1395	TC	396	Letters to Office of Technology Assessment, Dec. 9, 1991 and Jan. 7, 1992, with attachment summarizing information from the APHIS Fiscal Year 1990 Budget Witness Book	Evangelou		1992	English	Official report	OTA. (1993). Harmful Non-Indigenous Species in the United States. Ota-F-565, (September). Retrieved from https://www.anstaskforce.gov/Documents/OTA_Report_1993.pdf	No	Animalia	Arthropoda	Insecta	Lepidoptera	Gelechiidae	Pectinophora	Pectinophora gossypiella		Pink bollworm	Terrestrial	terrestrial					North America	USA		California	Site	1960-1988	Year	1960	1988	1960	1988	One-time	16600000			2.89986e+07	2.89986e+07	16600000	2.89986e+07	2.89986e+07	USD	1992	Publication year	Observed
1396	TC	396	Letters to Office of Technology Assessment, Dec. 9, 1991 and Jan. 7, 1992, with attachment summarizing information from the APHIS Fiscal Year 1990 Budget Witness Book	Evangelou		1992	English	Official report	OTA. (1993). Harmful Non-Indigenous Species in the United States. Ota-F-565, (September). Retrieved from https://www.anstaskforce.gov/Documents/OTA_Report_1993.pdf	No	Animalia	Arthropoda	Insecta	Lepidoptera	Erebidae	Lymantria	Lymantria dispar		European gypsy moth	Terrestrial	terrestrial					North America	USA		Unspecified	Country	1981	Year	1981	Unspecified	1981	1981	Potentially ongoing	764000000			2059624544	2059624544	764000000	2059624544	2059624544	USD	1981	Effective	Observed
1397	TC	342	Gypsy Moth in the Southeastern United States	Dickerson		1991	English	Official report	OTA. (1993). Harmful Non-Indigenous Species in the United States. Ota-F-565, (September). Retrieved from https://www.anstaskforce.gov/Documents/OTA_Report_1993.pdf	No	Animalia	Arthropoda	Insecta	Lepidoptera	Erebidae	Lymantria	Lymantria dispar		European gypsy moth	Terrestrial	terrestrial					North America	USA		North Carolina	Site	Unspecified	Year	Unspecified	Unspecified	1991	1991	Potentially ongoing	11000000			1.97979e+07	1.97979e+07	11000000	1.97979e+07	1.97979e+07	USD	1991	Publication year	Observed
1398	TC	343	Gypsy Moth Research and Development Program	U.S. Department of Agriculture, Forest Service, Northeastern Forest Experiment Station, Rad- nor, PA		1990	English	Official report	OTA. (1993). Harmful Non-Indigenous Species in the United States. Ota-F-565, (September). Retrieved from https://www.anstaskforce.gov/Documents/OTA_Report_1993.pdf	No	Animalia	Arthropoda	Insecta	Lepidoptera	Erebidae	Lymantria	Lymantria dispar		European gypsy moth	Terrestrial	terrestrial					North America	USA		Unspecified	Country	1990	Year	1990	Unspecified	1990	1990	Potentially ongoing	20000000			3.75207e+07	3.75207e+07	20000000	3.75207e+07	3.75207e+07	USD	1990	Effective	Observed
1399	TC	184	Analysis of a Successful Classical Biological Control Project: the Alfalfa Blotch Leafminer (Diptera: Agromyzidae) in the Northeastern United States	Drea and Hendrickson		1986	English	Peer-reviewed article	OTA. (1993). Harmful Non-Indigenous Species in the United States. Ota-F-565, (September). Retrieved from https://www.anstaskforce.gov/Documents/OTA_Report_1993.pdf	Yes	Animalia	Arthropoda	Insecta	Coleoptera	Curculionidae	Anthonomus	Anthonomus grandis		Boll weevil	Terrestrial	terrestrial					North America	USA		Unspecified	Country	1983	Year	1983	Unspecified	1983	1983	Potentially ongoing	1100000			2.70714e+06	2.70714e+06	1100000	2.70714e+06	2.70714e+06	USD	1983	Effective	Observed
1400	TC	184	Analysis of a Successful Classical Biological Control Project: the Alfalfa Blotch Leafminer (Diptera: Agromyzidae) in the Northeastern United States	Drea and Hendrickson		1986	English	Peer-reviewed article	OTA. (1993). Harmful Non-Indigenous Species in the United States. Ota-F-565, (September). Retrieved from https://www.anstaskforce.gov/Documents/OTA_Report_1993.pdf	Yes	Animalia	Arthropoda	Insecta	Coleoptera	Curculionidae	Anthonomus	Anthonomus grandis		Boll weevil	Terrestrial	terrestrial					North America	USA		Unspecified	Country	1983	Year	1983	Unspecified	1983	1983	Potentially ongoing	13000000			3.19935e+07	3.19935e+07	13000000	3.19935e+07	3.19935e+07	USD	1983	Effective	Potential
1401	TC	164	Aggregate Economic Effects of Alternative Boll Weevil Management Strategies	Taylor et al		1983	English	Peer-reviewed article	OTA. (1993). Harmful Non-Indigenous Species in the United States. Ota-F-565, (September). Retrieved from https://www.anstaskforce.gov/Documents/OTA_Report_1993.pdf	Yes	Animalia	Arthropoda	Insecta	Coleoptera	Curculionidae	Anthonomus	Anthonomus grandis		Boll weevil	Terrestrial	terrestrial					North America	USA		Unspecified	Country	1979	Year	1979	Unspecified	1979	1979	Potentially ongoing	279000			502148	502148	279000	502148	502148	USD	1991	Effective	Potential
1402	TC	164	Aggregate Economic Effects of Alternative Boll Weevil Management Strategies	Taylor et al		1983	English	Peer-reviewed article	OTA. (1993). Harmful Non-Indigenous Species in the United States. Ota-F-565, (September). Retrieved from https://www.anstaskforce.gov/Documents/OTA_Report_1993.pdf	Yes	Animalia	Arthropoda	Insecta	Coleoptera	Curculionidae	Anthonomus	Anthonomus grandis		Boll weevil	Terrestrial	terrestrial					North America	USA		Unspecified	Country	1979	Year	1979	Unspecified	1979	1979	Potentially ongoing	418000			752322	752322	418000	752322	752322	USD	1991	Effective	Potential
1403	TC	180	An Economic perspective of the California Mediterranean Fruit Fly Infestation	Conway		1982	English	Official report	OTA. (1993). Harmful Non-Indigenous Species in the United States. Ota-F-565, (September). Retrieved from https://www.anstaskforce.gov/Documents/OTA_Report_1993.pdf	No	Animalia	Arthropoda	Insecta	Diptera	Tephritidae	Ceratitis	Ceratitis capitata		Mediterranean fruit fly	Terrestrial	terrestrial					North America	USA		Unspecified	Country	1981	Year	1981	Unspecified	1981	1981	Potentially ongoing	93210000			1.67761e+08	1.67761e+08	93210000	1.67761e+08	1.67761e+08	USD	1991	Effective	Observed
1404	TC	180	An Economic perspective of the California Mediterranean Fruit Fly Infestation	Conway		1982	English	Official report	OTA. (1993). Harmful Non-Indigenous Species in the United States. Ota-F-565, (September). Retrieved from https://www.anstaskforce.gov/Documents/OTA_Report_1993.pdf	No	Animalia	Arthropoda	Insecta	Diptera	Tephritidae	Ceratitis	Ceratitis capitata		Mediterranean fruit fly	Terrestrial	terrestrial					North America	USA		Unspecified	Country	1981	Year	1981	Unspecified	1981	1981	Potentially ongoing	1829220000			3292254623	3292254623	1829220000	3292254623	3292254623	USD	1991	Effective	Potential
1405	TC	180	An Economic perspective of the California Mediterranean Fruit Fly Infestation	Conway		1982	English	Official report	OTA. (1993). Harmful Non-Indigenous Species in the United States. Ota-F-565, (September). Retrieved from https://www.anstaskforce.gov/Documents/OTA_Report_1993.pdf	No	Animalia	Arthropoda	Insecta	Diptera	Tephritidae	Ceratitis	Ceratitis capitata		Mediterranean fruit fly	Terrestrial	terrestrial					North America	USA		Unspecified	Country	1981	Year	1981	Unspecified	1981	1981	Potentially ongoing	1188410000			2138916214	2138916214	1188410000	2138916214	2138916214	USD	1991	Effective	Potential
1406	TC	180	An Economic perspective of the California Mediterranean Fruit Fly Infestation	Conway		1982	English	Official report	OTA. (1993). Harmful Non-Indigenous Species in the United States. Ota-F-565, (September). Retrieved from https://www.anstaskforce.gov/Documents/OTA_Report_1993.pdf	No	Animalia	Arthropoda	Insecta	Diptera	Tephritidae	Ceratitis	Ceratitis capitata		Mediterranean fruit fly	Terrestrial	terrestrial					North America	USA		Unspecified	Country	1981	Year	1981	Unspecified	1981	1981	Potentially ongoing	91400000			1.64503e+08	1.64503e+08	91400000	1.64503e+08	1.64503e+08	USD	1991	Effective	Observed
1407	TC	180	An Economic perspective of the California Mediterranean Fruit Fly Infestation	Conway		1982	English	Official report	OTA. (1993). Harmful Non-Indigenous Species in the United States. Ota-F-565, (September). Retrieved from https://www.anstaskforce.gov/Documents/OTA_Report_1993.pdf	No	Animalia	Arthropoda	Insecta	Diptera	Tephritidae	Ceratitis	Ceratitis capitata		Mediterranean fruit fly	Terrestrial	terrestrial					North America	USA		Unspecified	Country	1981	Year	1981	Unspecified	1981	1981	Potentially ongoing	4482490000			8067645459	8067645459	4482490000	8067645459	8067645459	USD	1991	Effective	Potential
1408	TC	346	Harmful Non-Indigenous Species in the United States	U.S. Congress, Office of Technology Assessment		1993	English	Official report	NA	Yes	Animalia	Arthropoda	Insecta	Coleoptera	Curculionidae	Anthonomus	Anthonomus grandis		Boll weevil	Terrestrial	terrestrial					North America	USA		North Carolina/Virginiga/South Carolina	Unit (Acre)	1986	Year	1986	1986	1986	1986	Potentially ongoing	77.5	76.65	78.32	131.48	131.48	77.49	131.48	131.48	USD	1993	Publication year	Potential
1409	TC	346	Harmful Non-Indigenous Species in the United States	U.S. Congress, Office of Technology Assessment		1993	English	Official report	NA	Yes	Animalia	Arthropoda	Insecta	Lepidoptera	Erebidae	Lymantria	Lymantria dispar		European gypsy moth	Terrestrial	terrestrial					North America	USA		Unspecified	Country	1987-1991	Period	1987	1991	1987	1991	One-time	10000000			1.69682e+07	1.69682e+07	2000000	3.39364e+06	3.39364e+06	USD	1993	Publication year	Observed
1410	TC	346	Harmful Non-Indigenous Species in the United States	U.S. Congress, Office of Technology Assessment		1993	English	Official report	NA	Yes	Animalia	Arthropoda	Insecta	Lepidoptera	Erebidae	Lymantria	Lymantria dispar		European gypsy moth	Terrestrial	terrestrial					North America	USA		Unspecified	Country	1992	Year	1992	Unspecified	1992	1992	Potentially ongoing	3849000			6.72383e+06	6.72383e+06	3849000	6.72383e+06	6.72383e+06	USD	1992	Effective	Observed
1411	TC	350	Hearings on Agriculture, Rural Development, Food and Drug Administration, and Related Agencies Appropriations for 1993: Part 4, Serial No. 054-898 0	U.S. Congress, House Committee on Appropriations, Subcommittee on Agriculture, Rural Development, and Related Agencies		1992	English	Official report	OTA. (1993). Harmful Non-Indigenous Species in the United States. Ota-F-565, (September). Retrieved from https://www.anstaskforce.gov/Documents/OTA_Report_1993.pdf	No	Animalia	Arthropoda	Insecta	Diverse/Unspecified	Diverse/Unspecified	Diverse/Unspecified	Diverse/Unspecified			Terrestrial	terrestrial					North America	USA		Unspecified	Country	1992	Year	1992	Unspecified	1992	1992	Potentially ongoing	9000000			1.57221e+07	1.57221e+07	9000000	1.57221e+07	1.57221e+07	USD	1992	Effective	Observed
1412	TC	349	Hearings on Agriculture, Rural Development and Related Agencies Appropriations for 1992: Part 5, Serial No. 43-194	U.S. Congress, House Committee on Appropriations, Subcommittee on Agriculture, Rural Development, and Related Agencies		1991	English	Official report	OTA. (1993). Harmful Non-Indigenous Species in the United States. Ota-F-565, (September). Retrieved from https://www.anstaskforce.gov/Documents/OTA_Report_1993.pdf	No	Animalia	Arthropoda	Insecta	Coleoptera	Rutelidae	Popillia	Popillia japonica		Japanese beetle	Terrestrial	terrestrial					North America	USA		Unspecified	Country	1990	Year	1990	Unspecified	1990	1990	Potentially ongoing	338900			635788	635788	338900	635788	635788	USD	1990	Effective	Observed
1413	TC	346	Harmful Non-Indigenous Species in the United States	U.S. Congress, Office of Technology Assessment		1993	English	Official report	NA	Yes	Animalia	Arthropoda	Insecta	Diptera	Tephritidae	Ceratitis	Ceratitis capitata		Mediterranean fruit fly	Terrestrial	terrestrial					North America	USA		California	Site	1980-1982	Period	1980	1982	1980	1982	One-time	100000000			1.69682e+08	1.69682e+08	3.33333e+07	5.65606e+07	5.65606e+07	USD	1993	Publication year	Observed
1414	TC	346	Harmful Non-Indigenous Species in the United States	U.S. Congress, Office of Technology Assessment		1993	English	Official report	NA	Yes	Animalia	Arthropoda	Insecta	Hemiptera	Delphacidae	Perkinsiella	Perkinsiella saccharicida		Sugar cane leafhopper	Terrestrial	terrestrial					Oceania/Pacific Islands	USA	Hawaii	Hawaii	Site	1904	Year	1904	Unspecified	1904	1904	Potentially ongoing	25000000			4.69009e+07	4.69009e+07	25000000	4.69009e+07	4.69009e+07	USD	1990	Effective	Observed
1415	TC	346	Harmful Non-Indigenous Species in the United States	U.S. Congress, Office of Technology Assessment		1993	English	Official report	NA	Yes	Animalia	Arthropoda	Insecta	Coleoptera	Dryophthoridae	Calandra	Calandra obscura		Sugar cane beetle borer	Terrestrial	terrestrial					Oceania/Pacific Islands	USA	Hawaii	Hawaii	Site	1990	Year	1990	Unspecified	1990	1990	Potentially ongoing	1000000			1.87603e+06	1.87603e+06	1000000	1.87603e+06	1.87603e+06	USD	1990	Effective	Observed
1416	TC	351	Hearings on Postal Implementation of the Agricultural Quarantine Enforcement Act	US congress, Senate Committee on Governmental Affairs, Subcommittee on Federal Services, Post Office, and Civil Service		1991	English	Official report	OTA. (1993). Harmful Non-Indigenous Species in the United States. Ota-F-565, (September). Retrieved from https://www.anstaskforce.gov/Documents/OTA_Report_1993.pdf	No	Animalia	Arthropoda	Insecta	Lepidoptera	Pyralidae	Elasmopalpus	Elasmopalpus lignosella		Lesser cornstalk borer	Terrestrial	terrestrial					Oceania/Pacific Islands	USA	Hawaii	Hawaii	Site	1986-1991	Period	1986	1991	1986	1991	Potentially ongoing	9000000			1.61983e+07	1.61983e+07	1500000	2.69972e+06	2.69972e+06	USD	1991	Publication year	Observed
1417	TC	351	Hearings on Postal Implementation of the Agricultural Quarantine Enforcement Act	US congress, Senate Committee on Governmental Affairs, Subcommittee on Federal Services, Post Office, and Civil Service		1991	English	Official report	OTA. (1993). Harmful Non-Indigenous Species in the United States. Ota-F-565, (September). Retrieved from https://www.anstaskforce.gov/Documents/OTA_Report_1993.pdf	No	Animalia	Arthropoda	Insecta	Hemiptera	Pyralidae	Sipha	Sipha flava		Yellow sugarcane aphid	Terrestrial	terrestrial					Oceania/Pacific Islands	USA	Hawaii	Hawaii	Site	1991	Year	1991	Unspecified	1991	1991	Potentially ongoing	200000			359963	359963	200000	359963	359963	USD	1991	Publication year	Observed
1418	TC	346	Harmful Non-Indigenous Species in the United States	U.S. Congress, Office of Technology Assessment		1993	English	Official report	Krcmar-Nozic, E., Wilson, B., & Arthur, L. (2000). The potential impacts of exotic forest pests in North America: a synthesis of research. Information Report BC-X-387.	Yes	Animalia	Arthropoda	Insecta	Diverse/Unspecified	Diverse/Unspecified	Diverse/Unspecified	Diverse/Unspecified			Terrestrial	terrestrial					Oceania/Pacific Islands	USA	Hawaii	Hawaii	Site	1986-1987	Year	1986	1987	1987	1987	One-time	50500			108942	108942	50500	108942	108942	USD	1987	Effective	Observed
1419	TC	346	Harmful Non-Indigenous Species in the United States	U.S. Congress, Office of Technology Assessment		1993	English	Official report	Krcmar-Nozic, E., Wilson, B., & Arthur, L. (2000). The potential impacts of exotic forest pests in North America: a synthesis of research. Information Report BC-X-387.	Yes	Animalia	Arthropoda	Insecta	Diverse/Unspecified	Diverse/Unspecified	Diverse/Unspecified	Diverse/Unspecified			Terrestrial	terrestrial					Oceania/Pacific Islands	USA	Hawaii	Hawaii	Site	1988-1989	Year	1988	1989	1989	1989	One-time	112300			222051	222051	112300	222051	222051	USD	1989	Effective	Observed
1420	TC	346	Harmful Non-Indigenous Species in the United States	U.S. Congress, Office of Technology Assessment		1993	English	Official report	Krcmar-Nozic, E., Wilson, B., & Arthur, L. (2000). The potential impacts of exotic forest pests in North America: a synthesis of research. Information Report BC-X-387.	Yes	Animalia	Arthropoda	Insecta	Diverse/Unspecified	Diverse/Unspecified	Diverse/Unspecified	Diverse/Unspecified			Terrestrial	terrestrial					Oceania/Pacific Islands	USA	Hawaii	Hawaii	Site	1991-1992	Year	1991	1992	1992	1992	One-time	89500			156348	156348	89500	156348	156348	USD	1992	Effective	Observed
1421	TC	346	Harmful Non-Indigenous Species in the United States	﻿Office of Technology Assessment		1993	English	Official report	Krcmar-Nozic, E., Wilson, B., & Arthur, L. (2000). The potential impacts of exotic forest pests in North America: a synthesis of research. Information Report BC-X-387.	Yes	Animalia	Arthropoda	Insecta	Diptera	Tephritidae	Ceratitis	Ceratitis capitata		Mediterranean fruit fly	Terrestrial	terrestrial					Oceania/Pacific Islands	USA	Hawaii	Hawaii	Site	1993	Year	1993	Unspecified	1993	1993	Potentially ongoing	100000			169682	169682	100000	169682	169682	USD	1993	Publication year	Observed
1422	TC	423	Mole Crickets and Arthropod Pests of Turf and Pastures	Frank		1990	English	Official report	OTA. (1993). Harmful Non-Indigenous Species in the United States. Ota-F-565, (September). Retrieved from https://www.anstaskforce.gov/Documents/OTA_Report_1993.pdf	No	Animalia	Arthropoda	Insecta	Orthoptera	Gryllotalpidae	Scapteriscus	Scapteriscus sp.		Mole crickets	Terrestrial	terrestrial					North America	USA		Florida/Georgia/Louisiana/Alabama	Site	1986	Year	1986	Unspecified	1986	1986	Potentially ongoing	77000000			1.72197e+08	1.72197e+08	77000000	1.72197e+08	1.72197e+08	USD	1986	Effective	Observed
1423	TC	346	Harmful Non-Indigenous Species in the United States	﻿Office of Technology Assessment		1993	English	Official report	Krcmar-Nozic, E., Wilson, B., & Arthur, L. (2000). The potential impacts of exotic forest pests in North America: a synthesis of research. Information Report BC-X-387.	Yes	Animalia	Arthropoda	Insecta	Hymenoptera	Formicidae	Solenopsis	Solenopsis invicta		Red Imported Fire Ant	Terrestrial	terrestrial					North America	USA		Unspecified	Country	1957-1991	Period	1957	1991	1957	1991	One-time	1.13235e+07			1.8665e+07	1.8665e+07	314286	533286	533286	USD	1993	Publication year	Observed
1424	TC	346	Harmful Non-Indigenous Species in the United States	﻿Office of Technology Assessment		1993	English	Official report	Krcmar-Nozic, E., Wilson, B., & Arthur, L. (2000). The potential impacts of exotic forest pests in North America: a synthesis of research. Information Report BC-X-387.	Yes	Animalia	Arthropoda	Insecta	Hemiptera	Aleyrodidae	Aleurocanthus	Aleurocanthus woglumi		Asian citrus blackfly	Terrestrial	terrestrial					North America	USA		Unspecified	Country	1957-1991	Period	1957	1991	1957	1991	One-time	1.02941e+07			1.69682e+07	1.69682e+07	285714	484805	484805	USD	1993	Publication year	Observed
1425	TC	346	Harmful Non-Indigenous Species in the United States	﻿Office of Technology Assessment		1993	English	Official report	Krcmar-Nozic, E., Wilson, B., & Arthur, L. (2000). The potential impacts of exotic forest pests in North America: a synthesis of research. Information Report BC-X-387.	Yes	Animalia	Arthropoda	Insecta	Diptera	Tephritidae	Ceratitis	Ceratitis capitata		Mediterranean fruit fly	Terrestrial	terrestrial					North America	USA		Unspecified	Country	1990-1991	Year	1990	1991	1991	1991	One-time	250000			424205	424205	250000	424205	424205	USD	1993	Publication year	Observed
1426	TC	592	The proposed honey bee regulated zone in Mexico	Rinderer et al		1987	English	Official report	NA	Yes	Animalia	Arthropoda	Insecta	Hymenoptera	Apidae	Apis	Apis mellifera		Africanized honeybee	Terrestrial	terrestrial					North America	USA		Georgia	Site	1987	Year	1987	Unspecified	1987	1987	Potentially ongoing	90000000			1.94154e+08	1.94154e+08	90000000	1.94154e+08	1.94154e+08	USD	1987	Publication year	Potential
1427	TC	346	Harmful Non-Indigenous Species in the United States	﻿Office of Technology Assessment		1993	English	Official report	Krcmar-Nozic, E., Wilson, B., & Arthur, L. (2000). The potential impacts of exotic forest pests in North America: a synthesis of research. Information Report BC-X-387.	Yes	Animalia	Arthropoda	Insecta	Diptera	Tephritidae	Bactrocera/Bactrocera/Ceratitis	Bactrocera cucurbitae/Bactrocera dorsalis/Ceratitis capitata		Melon fruit fly/Oriental fruit fly/Mediterranean fruit fly	Terrestrial	terrestrial					Oceania/Pacific Islands	USA	Hawaii	Hawaii	Site	1989	Year	1989	Unspecified	1989	1989	Potentially ongoing	300000000			5.93191e+08	5.93191e+08	300000000	5.93191e+08	5.93191e+08	USD	1989	Effective	Observed
1428	TC	346	Harmful Non-Indigenous Species in the United States	﻿Office of Technology Assessment		1993	English	Official report	Krcmar-Nozic, E., Wilson, B., & Arthur, L. (2000). The potential impacts of exotic forest pests in North America: a synthesis of research. Information Report BC-X-387.	Yes	Animalia	Arthropoda	Insecta	Diptera	Tephritidae	Bactrocera/Bactrocera/Ceratitis	Bactrocera cucurbitae/Bactrocera dorsalis/Ceratitis capitata		Melon fruit fly/Oriental fruit fly/Mediterranean fruit fly	Terrestrial	terrestrial					Oceania/Pacific Islands	USA	Hawaii	Hawaii	Site	Unspecified	Year	Unspecified	Unspecified	1993	1993	Potentially ongoing	3500000			5.93887e+06	5.93887e+06	3500000	5.93887e+06	5.93887e+06	USD	1993	Publication year	Observed
1429	TC	346	Harmful Non-Indigenous Species in the United States	﻿Office of Technology Assessment		1993	English	Official report	Krcmar-Nozic, E., Wilson, B., & Arthur, L. (2000). The potential impacts of exotic forest pests in North America: a synthesis of research. Information Report BC-X-387.	Yes	Animalia	Arthropoda	Insecta	Diptera	Tephritidae	Bactrocera/Bactrocera/Ceratitis	Bactrocera cucurbitae/Bactrocera dorsalis/Ceratitis capitata		Melon fruit fly/Oriental fruit fly/Mediterranean fruit fly	Terrestrial	terrestrial					Oceania/Pacific Islands	USA	Hawaii	Hawaii	Site	Unspecified	Year	Unspecified	Unspecified	1993	1993	One-time	1000000			1.69682e+06	1.69682e+06	1000000	1.69682e+06	1.69682e+06	USD	1993	Publication year	Observed
1430	TC	346	Harmful Non-Indigenous Species in the United States	﻿Office of Technology Assessment		1993	English	Official report	Krcmar-Nozic, E., Wilson, B., & Arthur, L. (2000). The potential impacts of exotic forest pests in North America: a synthesis of research. Information Report BC-X-387.	Yes	Animalia	Arthropoda	Insecta	Diptera	Tephritidae	Ceratitis	Ceratitis capitata		Mediterranean fruit fly	Terrestrial	terrestrial					Oceania/Pacific Islands	USA	Hawaii	Hawaii (Kauai)	Site	1990-1993	Period	1990	1993	1990	1993	One-time	2.66667e+08			339363715	339363715	50000000	8.48409e+07	8.48409e+07	USD	1993	Publication year	Observed
1439	TC	229	Cost-benefit analysis of biosecurity and forest health research	Turner et al		2004	English	Peer-reviewed article	NA	Yes	Animalia	Arthropoda	Insecta	Lepidoptera	Erebidae	Lymantria	Lymantria dispar		Gypsy moth	Terrestrial	terrestrial					North America	USA		Unspecified	Country	1933-1952	Period	1933	1952	1933	1952	Potentially ongoing	4.42105e+06			5.45047e+06	5.45047e+06	210000	272523	272523	USD	2004	Publication year	Observed
1440	TC	229	Cost-benefit analysis of biosecurity and forest health research	Turner et al		2004	English	Peer-reviewed article	NA	Yes	Animalia	Arthropoda	Insecta	Lepidoptera	Erebidae	Orgyia	Orgyia pseudotsugata		Douglas-fir tussock moth	Terrestrial	terrestrial					North America	USA		Pacific Northwest	Site	1983	Year	1983	Unspecified	1983	1983	Potentially ongoing	4340000			5.63215e+06	5.63215e+06	4340000	5.63215e+06	5.63215e+06	USD	2004	Publication year	Observed
1441	TC	229	Cost-benefit analysis of biosecurity and forest health research	Turner et al		2004	English	Peer-reviewed article	NA	Yes	Animalia	Arthropoda	Insecta	Lepidoptera	Erebidae	Orgyia	Orgyia pseudotsugata		Douglas-fir tussock moth	Terrestrial	terrestrial					North America	USA		Pacific Northwest	Site	1983	Year	1983	Unspecified	1983	1983	Potentially ongoing	660000			856502	856502	660000	856502	856502	USD	2004	Publication year	Observed
1443	GS	219	Pesticide resistance, population dynamics and invasive species management	McKee		2006	English	Official report	NA	Yes	Animalia	Arthropoda	Insecta	Hemiptera	Aleyrodidae	Trialeurodes	Trialeurodes vaporariorum		Greenhouse whitefly	Terrestrial	terrestrial					North America	USA		California	Site	Unspecified	Year	Unspecified	Unspecified	2006	2006	One-time	8900			10821.7	10821.7	8900	10821.7	10821.7	USD	2006	Publication year	Observed
1459	TC	575	THE FORMOSAN SUBTERRANEAN TERMITE IN HAWAII	Yates and Tamashiro		1990	English	Web page	Reaser, J. K., Meerson, L. a., Cronk, Q., & Poorter, M. D. (2007). Ecological and socioeconomic impacts of invasive alien species in island ecosystems. Environmental Conservation, 34(June), 98–111. https://doi.org/10.1017/S0376892907003815	Yes	Animalia	Arthropoda	Insecta	Blattodea	Rhinotermitidae	Coptotermes	Coptotermes formosanus		Formosan termite	Terrestrial	terrestrial					Oceania/Pacific Islands	USA	Hawaii	Hawaii	Site	1990	Year	1990	Unspecified	1990	1990	Potentially ongoing	60000000			1.12562e+08	1.12562e+08	60000000	1.12562e+08	1.12562e+08	USD	1990	Publication year	Observed
1463	TC	386	Invasores en Mesoamerica y el Caribe: Invasives in Mesoamerica and the Caribbean	Hernandez et al		2002	Spanish	Official report	Reaser, J. K., Meerson, L. a., Cronk, Q., & Poorter, M. D. (2007). Ecological and socioeconomic impacts of invasive alien species in island ecosystems. Environmental Conservation, 34(June), 98–111. https://doi.org/10.1017/S0376892907003817	no	Animalia	Arthropoda	Insecta	Diptera	Tephritidae	Ceratitis	Ceratitis capitata		Mediterranean fruit fly	Terrestrial	terrestrial					North America	USA		Unspecified	Country	1993	Year	1993	1993	1993	1993	One-time	93000000			1.26733e+08	1.26733e+08	93000000	1.26733e+08	1.26733e+08	USD	2002	Publication year	Observed
1464	TC	386	Invasores en Mesoamerica y el Caribe: Invasives in Mesoamerica and the Caribbean	Hernandez et al		2002	Spanish	Official report	Reaser, J. K., Meerson, L. a., Cronk, Q., & Poorter, M. D. (2007). Ecological and socioeconomic impacts of invasive alien species in island ecosystems. Environmental Conservation, 34(June), 98–111. https://doi.org/10.1017/S0376892907003817	no	Animalia	Arthropoda	Insecta	Diptera	Tephritidae	Ceratitis	Ceratitis capitata		Mediterranean fruit fly	Terrestrial	terrestrial					North America	USA		Unspecified	Country	Unspecified	Year	Unspecified	Unspecified	2002	2002	Potentially ongoing	1829000000			2492418168	2492418168	1829000000	2492418168	2492418168	USD	2002	Publication year	Potential
1468	GS	303	Economic Dimensions of Invasive Species	Evans		2003	English	Peer-reviewed article	NA	Yes	Animalia	Arthropoda	Insecta	Coleoptera	Cerambycidae	Anoplophora	Anoplophora glabripennis		Asian long-horned beetle	Terrestrial	terrestrial					North America	USA	New York/Illinois	New York/Illinois	Site	1996-2003	Period	1996	2003	1996	2003	Potentially ongoing	30000000			3.99742e+07	3.99742e+07	3750000	4.99678e+06	4.99678e+06	USD	2003	Publication year	Observed
1469	TC	296	Eradication of Exotic Pests : Analysis with Case Histories, Yale University Press	Dahlsten and Garcia		1989	English	Book	Myers, J. H., Simberloff, D., Kuris, A. M., & Carey, J. R. (2000). Eradication revisited: Dealing with exotic species. Trends in Ecology and Evolution, 15(8), 316–320. https://doi.org/10.1016/S0169-5347(00)01914-5	No	Animalia	Arthropoda	Insecta	Hymenoptera	Formicidae	Solenopsis	Solenopsis invicta		Red Imported Fire Ant	Terrestrial	terrestrial					North America	USA		Unspecified	Country	1930s-1950s	Period	1930	1950	1930	1950	One-time	210000000			4.15233e+08	4.15233e+08	10000000	1.9773e+07	1.9773e+07	USD	1989	Publication year	Observed
1470	GS	91	Eradication revisited: Dealing with exotic species	Myers et al		2000	English	Peer-reviewed article	NA	Yes	Animalia	Arthropoda	Insecta	Lepidoptera	Tortricidae	Cydia	Cydia pomonella		Codling moth	Terrestrial	terrestrial					North America	Canada		British Columbia	Unit (Ha)	1975	Year	1975	Unspecified	1975	1975	Potentially ongoing	225			215.66	260.91	225	215.66	260.91	CAD	2000	Publication year	Observed
1471	GS	91	Eradication revisited: Dealing with exotic species	Myers et al		2000	English	Peer-reviewed article	NA	Yes	Animalia	Arthropoda	Insecta	Lepidoptera	Tortricidae	Cydia	Cydia pomonella		Codling moth	Terrestrial	terrestrial					North America	Canada		British Columbia	Unit (Ha)	1975	Year	1975	Unspecified	1975	1975	Potentially ongoing	95			91.06	110.16	95	91.06	110.16	CAD	2000	Publication year	Observed
1472	TC	286	Embargo on California produce would cause revenue, job loss	Siebert and Cooper		1995	English	Peer-reviewed article	Myers, J. H., Simberloff, D., Kuris, A. M., & Carey, J. R. (2000). Eradication revisited: Dealing with exotic species. Trends in Ecology and Evolution, 15(8), 316–320. https://doi.org/10.1016/S0169-5347(00)01914-5	Yes	Animalia	Arthropoda	Insecta	Diptera	Tephritidae	Ceratitis	Ceratitis capitata		Mediterranean fruit fly	Terrestrial	terrestrial					North America	USA		California	Site	1995	Year	1995	Unspecified	1995	1995	Potentially ongoing	684000000	493000000	875000000	778726652	778726652	684000000	778726652	778726652	USD	1995	Publication year	Potential
1473	TC	286	Embargo on California produce would cause revenue, job loss	Siebert and Cooper		1995	English	Peer-reviewed article	Myers, J. H., Simberloff, D., Kuris, A. M., & Carey, J. R. (2000). Eradication revisited: Dealing with exotic species. Trends in Ecology and Evolution, 15(8), 316–320. https://doi.org/10.1016/S0169-5347(00)01914-5	Yes	Animalia	Arthropoda	Insecta	Diptera	Tephritidae	Ceratitis	Ceratitis capitata		Mediterranean fruit fly	Terrestrial	terrestrial					North America	USA		California	Site	1992	Year	1992	Unspecified	1992	1992	Potentially ongoing	564000000			9.85253e+08	9.85253e+08	564000000	9.85253e+08	9.85253e+08	USD	1992	Effective	Potential
1474	TC	286	Embargo on California produce would cause revenue, job loss	Siebert and Cooper		1995	English	Peer-reviewed article	Myers, J. H., Simberloff, D., Kuris, A. M., & Carey, J. R. (2000). Eradication revisited: Dealing with exotic species. Trends in Ecology and Evolution, 15(8), 316–320. https://doi.org/10.1016/S0169-5347(00)01914-5	Yes	Animalia	Arthropoda	Insecta	Diptera	Tephritidae	Ceratitis	Ceratitis capitata		Mediterranean fruit fly	Terrestrial	terrestrial					North America	USA		California	Site	1980-1981	Period	1980	1981	1981	1981	One-time	100000000			1.13849e+08	1.13849e+08	100000000	1.13849e+08	1.13849e+08	USD	1982	Effective	Observed
1475	GS	91	Eradication revisited: Dealing with exotic species	Myers et al		2000	English	Peer-reviewed article	NA	Yes	Animalia	Arthropoda	Insecta	Coleoptera	Curculionidae	Anthonomus	Anthonomus grandis		Boll weevil	Terrestrial	terrestrial					North America	USA		Unspecified	Country	2000	Year	2000	Unspecified	2000	2000	Potentially ongoing	100000000			1.42346e+08	1.42346e+08	100000000	1.42346e+08	1.42346e+08	USD	2000	Publication year	Observed
1476	GS	91	Eradication revisited: Dealing with exotic species	Myers et al		2000	English	Peer-reviewed article	NA	Yes	Animalia	Arthropoda	Insecta	Lepidoptera	Erebidae	Lymantria	Lymantria dispar		Gypsy moth	Terrestrial	terrestrial					North America	Canada		Victoria/British Columbia	Site	Summer 1999	Year	1999	1999	1999	1999	One-time	3000000			2.97132e+06	3.70721e+06	3000000	2.97132e+06	3.70721e+06	CAD	1999	Effective	Observed
1478	TC	333	Fiscal year 2005 interagency invasive species performance-based budget	National Invasive Species Council		2004	English	Official report	Simberloff, D., Parker, I. M., & Windle, P. N. (2005). Introduced species policy, management, and future research needs. Frontiers in Ecology and the Environment, 3(1), 12–20. https://doi.org/10.1890/1540-9295(2005)003[0012:ispmaf]2.0.co;2	No	Animalia	Arthropoda	Insecta	Coleoptera	Buprestidae	Agrilus	Agrilus planipennis		Emerald ash borer	Terrestrial	terrestrial					North America	USA		Unspecified	Country	2004	Year	2004	Unspecified	2004	2004	Potentially ongoing	2018000			2.61882e+06	2.61882e+06	2018000	2.61882e+06	2.61882e+06	USD	2004	Effective	Observed
1479	TC	333	Fiscal year 2005 interagency invasive species performance-based budget	National Invasive Species Council		2005	English	Official report	Simberloff, D., Parker, I. M., & Windle, P. N. (2005). Introduced species policy, management, and future research needs. Frontiers in Ecology and the Environment, 3(1), 12–20. https://doi.org/10.1890/1540-9295(2005)003[0012:ispmaf]2.0.co;2	No	Animalia	Arthropoda	Insecta	Coleoptera	Buprestidae	Agrilus	Agrilus planipennis		Emerald ash borer	Terrestrial	terrestrial					North America	USA		Unspecified	Country	2005	Year	2005	Unspecified	2005	2005	Potentially ongoing	16978000			2.13099e+07	2.13099e+07	16978000	2.13099e+07	2.13099e+07	USD	2005	Effective	Observed
1480	TC	385	Invasive species: Federal and selected state funding to address harmful nonnative species, GAO/RCED-00-219	General Accounting Office, US Congress		2000	English	Official report	Simberloff, D., Parker, I. M., & Windle, P. N. (2005). Introduced species policy, management, and future research needs. Frontiers in Ecology and the Environment, 3(1), 12–20. https://doi.org/10.1890/1540-9295(2005)003[0012:ispmaf]2.0.co;2	Yes	Animalia	Arthropoda	Diverse/Unspecified	Diverse/Unspecified	Diverse/Unspecified	Diverse/Unspecified	Diverse/Unspecified		Terrestrial arthropods	Terrestrial	terrestrial					North America	USA		Unspecified	Country	1999	Year	1999	Unspecified	1999	1999	Potentially ongoing	154500000			2.27351e+08	2.27351e+08	154500000	2.27351e+08	2.27351e+08	USD	1999	Effective	Observed
1511	TC	268	Economic effects evaluation: spruce bark beetles. In Pest Risk Assessment of the Importation of Larch from Siberia and the Soviet Far East	Holmes and Lee		1999	English	Book chapter	Holmes, T. P., Aukema, J. E., Von Holle, B., Liebhold, A., & Sills, E. (2009). Economic impacts of invasive species in forests: Past, present, and future. Annals of the New York Academy of Sciences, 1162, 18–38. https://doi.org/10.1111/j.1749-6632.2009.04446.x	Yes	Animalia	Arthropoda	Diverse/Unspecified	Diverse/Unspecified	Diverse/Unspecified	Diverse/Unspecified	Diverse/Unspecified		Defoliator insects	Terrestrial	terrestrial					North America	USA		Unspecified	Country	1990-2040	Period	1990	2040	1990	2040	Potentially ongoing	46729500	35049000	58410000	55243474797	55243474797	9.16265e+08	1083205388	1083205388	USD	2007	Effective	Potential
1512	GS	305	Impacts of Introduced Species in the United States	Simberloff		1996	English	Peer-reviewed article	NA	Yes	Animalia	Arthropoda	Insecta	Hymenoptera	Formicidae	Solenopsis	Solenopsis invicta		Red Imported Fire Ant	Terrestrial	terrestrial					North America	USA		Southern USA	Site	1996	Year	1996	1996	1996	1996	One-time	200000000			3.12553e+08	3.12553e+08	200000000	3.12553e+08	3.12553e+08	USD	1996	Publication year	Observed
1513	GS	305	Impacts of Introduced Species in the United States	Simberloff		1996	English	Peer-reviewed article	NA	Yes	Animalia	Arthropoda	Insecta	Lepidoptera	Erebidae	Lymantria	Lymantria dispar		European gypsy moth	Terrestrial	terrestrial					North America	USA		Unspecified	Country	1981	Year	1981	Unspecified	1981	1981	Potentially ongoing	764000000			2059624544	2059624544	764000000	2059624544	2059624544	USD	1981	Effective	Observed
1514	GS	305	Impacts of Introduced Species in the United States	Simberloff		1996	English	Peer-reviewed article	NA	Yes	Animalia	Arthropoda	Insecta	Lepidoptera	Erebidae	Lymantria	Lymantria dispar		Asian Gypsy moth	Terrestrial	terrestrial					North America	USA		Unspecified	Country	1981	Year	1981	1981	1981	1981	One-time	20000000			3.12553e+07	3.12553e+07	20000000	3.12553e+07	3.12553e+07	USD	1996	Publication year	Observed
1515	GS	305	Impacts of Introduced Species in the United States	Simberloff		1996	English	Peer-reviewed article	NA	Yes	Animalia	Arthropoda	Insecta	Hemiptera	Aleyrodidae	Aleurocanthus	Aleurocanthus woglumi		Asian citrus blackfly	Terrestrial	terrestrial					North America	USA		Florida	Site	1934-1937	Period	1934	1937	1934	1937	One-time	200000			312553	312553	50000	78138.2	78138.2	USD	1996	Publication year	Observed
1517	TC	210	Boll Weevil Fact Sheet	Purdue University		1995	English	Fact sheet	Perrault, A., Bennett, M., Burgiel, S., Delach, A., & Muffett, C. (2003). Invasive Species , Agriculture and Trade : Case Studies from the NAFTA Context. Second North American Symposium on Assessing the Environmental Effescts of Trade, (March), 55.	No	Animalia	Arthropoda	Insecta	Coleoptera	Curculionidae	Anthonomus	Anthonomus grandis		Boll weevil	Terrestrial	terrestrial					North America	USA		Unspecified	Country	1995	Year	1995	Unspecified	1995	1995	Potentially ongoing	100000000			1.60857e+08	1.60857e+08	100000000	1.60857e+08	1.60857e+08	USD	1995	Publication year	Observed
1518	TC	168	Alien Invasion: America’s Battle with Non-Native Animals and Plants	Devine		1998	English	Book	Perrault, A., Bennett, M., Burgiel, S., Delach, A., & Muffett, C. (2003). Invasive Species , Agriculture and Trade : Case Studies from the NAFTA Context. Second North American Symposium on Assessing the Environmental Effescts of Trade, (March), 55.	No	Animalia	Arthropoda	Insecta	Coleoptera	Curculionidae	Hypera	Hypera postica		Alfalfa weevil	Terrestrial	terrestrial					North America	USA		Unspecified	Country	1998	Year	1998	Unspecified	1998	1998	Potentially ongoing	500000000			7.51862e+08	7.51862e+08	500000000	7.51862e+08	7.51862e+08	USD	1998	Publication year	Observed
1519	TC	168	Alien Invasion: America’s Battle with Non-Native Animals and Plants	Devine		1998	English	Book	Perrault, A., Bennett, M., Burgiel, S., Delach, A., & Muffett, C. (2003). Invasive Species , Agriculture and Trade : Case Studies from the NAFTA Context. Second North American Symposium on Assessing the Environmental Effescts of Trade, (March), 55.	No	Animalia	Arthropoda	Insecta	Hemiptera	Aphididae	Diuraphis	Diuraphis noxia		Russian wheat aphid	Terrestrial	terrestrial					North America	USA		Unspecified	Country	1998	Year	1998	Unspecified	1998	1998	Potentially ongoing	170000000			255633122	255633122	170000000	255633122	255633122	USD	1998	Publication year	Observed
1520	TC	275	Economic Impact of Pierce’s Disease on California Grape Industry	Siebert		2001	English	Conference proceedings	Perrault, A., Bennett, M., Burgiel, S., Delach, A., & Muffett, C. (2003). Invasive Species , Agriculture and Trade : Case Studies from the NAFTA Context. Second North American Symposium on Assessing the Environmental Effescts of Trade, (March), 55.	Yes	Animalia	Arthropoda	Insecta	Hemiptera	Cicadellidae	Homalodisca	Homalodisca vitripennis		Glassy-winged sharpshooter	Terrestrial	terrestrial					North America	USA		California	Site	1998-1999	Year	1998	1999	1999	1999	Potentially ongoing	37900000			5.57709e+07	5.57709e+07	37900000	5.57709e+07	5.57709e+07	USD	1999	Effective	Observed
1521	TC	609	USDA Budget Summary, Fiscal Year 2004	United States Department of Agriculture		2003	English	Official report	Perrault, A., Bennett, M., Burgiel, S., Delach, A., & Muffett, C. (2003). Invasive Species , Agriculture and Trade : Case Studies from the NAFTA Context. Second North American Symposium on Assessing the Environmental Effescts of Trade, (March), 55.	Yes	Animalia	Arthropoda	Insecta	Coleoptera	Curculionidae	Anthonomus	Anthonomus grandis		Boll weevil	Terrestrial	terrestrial					North America	USA		Unspecified	Country	2002	Year	2002	Unspecified	2002	2002	Potentially ongoing	77000000			1.0493e+08	1.0493e+08	77000000	1.0493e+08	1.0493e+08	USD	2002	Effective	Observed
1522	TC	609	USDA Budget Summary, Fiscal Year 2004	United States Department of Agriculture		2003	English	Official report	Perrault, A., Bennett, M., Burgiel, S., Delach, A., & Muffett, C. (2003). Invasive Species , Agriculture and Trade : Case Studies from the NAFTA Context. Second North American Symposium on Assessing the Environmental Effescts of Trade, (March), 55.	Yes	Animalia	Arthropoda	Insecta	Coleoptera	Curculionidae	Anthonomus	Anthonomus grandis		Boll weevil	Terrestrial	terrestrial					North America	USA		Unspecified	Country	2003	Year	2003	Unspecified	2003	2003	Potentially ongoing	34000000			4.53041e+07	4.53041e+07	34000000	4.53041e+07	4.53041e+07	USD	2003	Effective	Potential
1523	TC	609	USDA Budget Summary, Fiscal Year 2004	United States Department of Agriculture		2003	English	Official report	Perrault, A., Bennett, M., Burgiel, S., Delach, A., & Muffett, C. (2003). Invasive Species , Agriculture and Trade : Case Studies from the NAFTA Context. Second North American Symposium on Assessing the Environmental Effescts of Trade, (March), 55.	Yes	Animalia	Arthropoda	Insecta	Diptera	Tephritidae	Anastrepha/Ceratitis	Anastrepha ludens/Ceratitis capitata		Mexican fruit fly/Mediterranean fruit fly	Terrestrial	terrestrial					North America	USA		Unspecified	Country	2002	Year	2002	Unspecified	2002	2002	Potentially ongoing	37000000			5.04207e+07	5.04207e+07	37000000	5.04207e+07	5.04207e+07	USD	2002	Effective	Observed
1524	TC	609	USDA Budget Summary, Fiscal Year 2004	United States Department of Agriculture		2003	English	Official report	Perrault, A., Bennett, M., Burgiel, S., Delach, A., & Muffett, C. (2003). Invasive Species , Agriculture and Trade : Case Studies from the NAFTA Context. Second North American Symposium on Assessing the Environmental Effescts of Trade, (March), 55.	Yes	Animalia	Arthropoda	Insecta	Diptera	Tephritidae	Anastrepha/Ceratitis	Anastrepha ludens/Ceratitis capitata		Mexican fruit fly/Mediterranean fruit fly	Terrestrial	terrestrial					North America	USA		Unspecified	Country	2003	Year	2003	Unspecified	2003	2003	Potentially ongoing	62000000			8.26133e+07	8.26133e+07	62000000	8.26133e+07	8.26133e+07	USD	2003	Effective	Potential
1525	TC	191	APHIS Fruit Fly Program Information http://www.aphis.usda.gov/ppq/ispm/ff/index.html	Animal and Plant Health Inspection Service, United States Department of Agriculture.		2003	English	Web page	Perrault, A., Bennett, M., Burgiel, S., Delach, A., & Muffett, C. (2003). Invasive Species , Agriculture and Trade : Case Studies from the NAFTA Context. Second North American Symposium on Assessing the Environmental Effescts of Trade, (March), 55.	Yes	Animalia	Arthropoda	Insecta	Diptera	Tephritidae	Anastrepha/Ceratitis	Anastrepha ludens/Ceratitis capitata		Mexican fruit fly/Mediterranean fruit fly	Terrestrial	terrestrial					North America	USA		Unspecified	Country	2003	Year	2003	Unspecified	2003	2003	Potentially ongoing	821000000			1093960650	1093960650	821000000	1093960650	1093960650	USD	2003	Effective	Potential
1526	TC	194	Asian Long-horned Beetle Fact Sheet. Washington, DC: USDA APHIS	USDA APHIS		2001	English	Fact sheet	Perrault, A., Bennett, M., Burgiel, S., Delach, A., & Muffett, C. (2003). Invasive Species , Agriculture and Trade : Case Studies from the NAFTA Context. Second North American Symposium on Assessing the Environmental Effescts of Trade, (March), 55.	Yes	Animalia	Arthropoda	Insecta	Coleoptera	Cerambycidae	Anoplophora	Anoplophora glabripennis		Asian long-horned beetle	Terrestrial	terrestrial					North America	USA		Unspecified	Country	2001	Year	2001	Unspecified	2001	2001	Potentially ongoing	41000000000			56757734846	56757734846	41000000000	56757734846	56757734846	USD	2001	Publication year	Observed
1528	GS	218	Paying for protection from invasive species	Jenkins		2002	English	Peer-reviewed article	NA	Yes	Animalia	Arthropoda	Insecta	Coleoptera	Cerambycidae	Anoplophora	Anoplophora glabripennis		Asian long-horned beetle	Terrestrial	terrestrial					North America	USA		Unspecified	Country	20 years	Period	2002	2022	2002	2022	Potentially ongoing	28571428571			38934908501	38934908501	1428571429	1946745425	1946745425	USD	2002	Publication year	Potential
1529	GS	218	Paying for protection from invasive species	Jenkins		2002	English	Peer-reviewed article	NA	Yes	Animalia	Arthropoda	Insecta	Coleoptera	Cerambycidae	Anoplophora	Anoplophora glabripennis		Asian long-horned beetle	Terrestrial	terrestrial					North America	USA		Unspecified	Country	Unspecified	Year	Unspecified	Unspecified	2002	2002	One-time	365000000			4.97393e+08	4.97393e+08	365000000	4.97393e+08	4.97393e+08	USD	2002	Publication year	Potential
1530	TC	420	Mexican Rice Borer, Eoreuma Loftini in the Lower Rio Grande Valley of Texas: Its History and Control	Legaspi et al		1997	English	Peer-reviewed article	Costello, C., & McAusland, C. (2003). Protectionism, trade, and measures of damage from exotic species introductions. American Journal of Agricultural Economics, 85(4), 964–975. https://doi.org/10.1111/1467-8276.00500	Yes	Animalia	Arthropoda	Insecta	Lepidoptera	Crambidae	Eoreuma	Eoreuma loftini		Mexican rice borer	Terrestrial	terrestrial					North America	USA		Unspecified	Site	1997	Year	1997	Unspecified	1997	1997	Potentially ongoing	15000000	10000000	20000000	2.2906e+07	2.2906e+07	15000000	2.2906e+07	2.2906e+07	USD	1997	Publication year	Observed
1536	TC	574	The Formosan Subterranean Termite in Georgia	US EPA		2005	English	Official report	Mainka, S. A., & Howard, G. W. (2010). Climate change and invasive species: Double jeopardy. Integrative Zoology, 5(2), 102–111. https://doi.org/10.1111/j.1749-4877.2010.00193.x ID 9684	No	Animalia	Arthropoda	Insecta	Blattodea	Rhinotermitidae	Coptotermes	Coptotermes formosanus		Formosan termite	Terrestrial	terrestrial					North America	USA		Louisiana	Site	2005	Year	2005	Unspecified	2005	2005	Potentially ongoing	100000000			1.25515e+08	1.25515e+08	100000000	1.25515e+08	1.25515e+08	USD	2005	Publication year	Potential
1549	TC	395	Legal implications of eradication programs. Pages 66– 73 in D. L. Dahlsten and R. Garcia, eds. Eradication of Exotic Pests. New Haven, CT: Yale University Press	Getz		1989	English	Book chapter	Simberloff, D. (2003). Eradication - preventing invasions at the outset. Weed Science, 51(2), 247–253. https://doi.org/10.1614/0043-1745(2003)051 14073	No	Animalia	Arthropoda	Insecta	Diptera	Tephritidae	Ceratitis	Ceratitis capitata		Mediterranean fruit fly	Terrestrial	terrestrial					North America	USA		California	Site	1989	Year	1989	Unspecified	1989	1989	Potentially ongoing	3700000			7.31602e+06	7.31602e+06	3700000	7.31602e+06	7.31602e+06	USD	1989	Publication year	Observed
1550	TC	373	Introduction and Establishment of Exotic Insect and Mite Pests of Avocados in California, Changes in Sanitary and Phytosanitary Policies, and Their Economic and Social Impact	Hoddle et al		2003	English	Book chapter	Olson, L. (2006). The Economics of Terrestrial Invasive Species: A Review of the Literature. Agricultural and Resource Economics Review, 35(1), 178–194. https://doi.org/10.1017/S1068280500010145	Yes	Animalia	Arthropoda	Arachnida/Insecta	Diverse/Unspecified	Diverse/Unspecified	Diverse/Unspecified	Diverse/Unspecified		Diverse (insects/mites)	Terrestrial	terrestrial					North America	USA		Unspecified	Country	2003	Year	2003	Unspecified	2003	2003	Potentially ongoing	6100000	4600000	7600000	8.12809e+06	8.12809e+06	6100000	8.12809e+06	8.12809e+06	USD	2003	Publication year	Potential
1555	TC	190	Ant warfare: science fights fire with flies: natural enemy central to effort to limit spread of the insects. USA Today (Nation),18 November 2005,p 3A	Linn		2005	English	Official report	Pimentel D., Pimentel M. and Wilson A. (2007) Plant,Animal,and Microbe Invasive Species in the United States and World In Nentwig, W. (ed). Biological Invasions https://doi.org/10.1007/978-3-540-36920-2	No	Animalia	Arthropoda	Insecta	Hymenoptera	Formicidae	Solenopsis	Solenopsis invicta		Red Imported Fire Ant	Terrestrial	terrestrial					North America	USA		Unspecified	Country	2005	Year	2005	Unspecified	2005	2005	Potentially ongoing	6000000000			7530876894	7530876894	6000000000	7530876894	7530876894	USD	2005	Publication year	Observed
1556	TC	336	Forest depletions caused by insects and diseases in Canada 1982-1987. Forest insect and disease survey information	Hall and Moody		1994	English	Official report	Pimentel D., Pimentel M. and Wilson A. (2007) Plant,Animal,and Microbe Invasive Species in the United States and World In Nentwig, W. (ed). Biological Invasions https://doi.org/10.1007/978-3-540-36920-2	Yes	Diverse/Unspecified	Diverse/Unspecified	Diverse/Unspecified	Diverse/Unspecified	Diverse/Unspecified	Diverse/Unspecified	Diverse/Unspecified		Diverse (forest pests including pathogens)	Aquatic/Terrestrial	diverse/Unspecified					North America	USA		Unspecified	Country	Unspecified	Year	Unspecified	Unspecified	1994	1994	Potentially ongoing	6000000000			9922195986	9922195986	6000000000	9922195986	9922195986	USD	1994	Publication year	Observed
1557	TC	182	An investigation into the effects of redlegged earth mite and Lucerne flea on the performance of subterranean clover in annual pasture in S.New South Wales.	Slater et al		1996	English	Official report	Pimentel D., Pimentel M. and Wilson A. (2007) Plant,Animal,and Microbe Invasive Species in the United States and World In Nentwig, W. (ed). Biological Invasions https://doi.org/10.1007/978-3-540-36920-2	No	Animalia	Arthropoda	Diverse/Unspecified	Diverse/Unspecified	Diverse/Unspecified	Diverse/Unspecified	Diverse/Unspecified		Diverse (insects/mites)	Aquatic/Terrestrial	terrestrial					North America	USA		Unspecified	Country	1996	Year	1996	Unspecified	1996	1996	Potentially ongoing	228000000			3.5631e+08	3.5631e+08	228000000	3.5631e+08	3.5631e+08	USD	1996	Publication year	Observed
1558	TC	480	Protecting Hawaii from Invasive Pests	Coordinating Group on Alien Pest Species		2001	English	Official report	IKUMA, E. K., SUGANO, D., & MARDFIN, J. K. (2002). Filling the Gaps in the Fight Against Invasive Species. Honolulu, Hawaii.	Yes	Animalia	Arthropoda	Insecta	Blattodea	Rhinotermitidae	Coptotermes	Coptotermes formosanus		Formosan termite	Terrestrial	terrestrial					Oceania/Pacific Islands	USA	Hawaii	Hawaii	Site	2001	Year	2001	Unspecified	2001	2001	Potentially ongoing	150000000			2.0765e+08	2.0765e+08	150000000	2.0765e+08	2.0765e+08	USD	2001	Publication year	Observed
1559	TC	480	Protecting Hawaii from Invasive Pests	Coordinating Group on Alien Pest Species		2001	English	Official report	IKUMA, E. K., SUGANO, D., & MARDFIN, J. K. (2002). Filling the Gaps in the Fight Against Invasive Species. Honolulu, Hawaii.	Yes	Animalia	Arthropoda	Insecta	Diptera	Tephritidae	Diverse/Unspecified	Diverse/Unspecified		Alien fruit flies	Terrestrial	terrestrial					Oceania/Pacific Islands	USA	Hawaii	Hawaii	Site	2001	Year	2001	Unspecified	2001	2001	Potentially ongoing	300000000			4.153e+08	4.153e+08	300000000	4.153e+08	4.153e+08	USD	2001	Publication year	Observed
1560	TC	594	The Silent Invasion	CGAPS		1999	English	Official report	IKUMA, E. K., SUGANO, D., & MARDFIN, J. K. (2002). Filling the Gaps in the Fight Against Invasive Species. Honolulu, Hawaii.	No	Animalia	Arthropoda	Insecta	Blattodea	Rhinotermitidae	Coptotermes	Coptotermes formosanus		Formosan termite	Terrestrial	terrestrial					Oceania/Pacific Islands	USA	Hawaii	Hawaii	Site	1986	Year	1986	Unspecified	1986	1986	Potentially ongoing	60000000			1.34179e+08	1.34179e+08	60000000	1.34179e+08	1.34179e+08	USD	1986	Effective	Observed
1561	TC	594	The Silent Invasion	CGAPS		1999	English	Official report	IKUMA, E. K., SUGANO, D., & MARDFIN, J. K. (2002). Filling the Gaps in the Fight Against Invasive Species. Honolulu, Hawaii.	No	Animalia	Arthropoda	Insecta	Blattodea	Rhinotermitidae	Coptotermes	Coptotermes formosanus		Formosan termite	Terrestrial	terrestrial					Oceania/Pacific Islands	USA	Hawaii	Hawaii	Site	1995	Year	1995	Unspecified	1995	1995	Potentially ongoing	150000000			2.41286e+08	2.41286e+08	150000000	2.41286e+08	2.41286e+08	USD	1995	Effective	Observed
1562	TC	347	Harmful Non-Native Species: Issues for Congress	Corn et al		1999	English	Official report	Pimentel, D., Lach, L., Zuniga, R., & Morrison, D. (2000). Environmental and Economic Costs of Nonindigenous Species in the United States. BioScience, 50(9), 783–792. https://doi.org/10.1641/0006-3568(2000)050	No	Animalia	Arthropoda	Insecta	Blattodea	Rhinotermitidae	Coptotermes	Coptotermes formosanus		Formosan termite	Terrestrial	terrestrial					North America	USA		Unspecified	Country	1999	Year	1999	Unspecified	1999	1999	Potentially ongoing	1000000000			1471526840	1471526840	1000000000	1471526840	1471526840	USD	1999	Publication year	Observed
1565	GS	86	Environmental and Economic Costs of Nonindigenous Species in the United States	Pimentel et al		2000	English	Peer-reviewed article	NA	Yes	Animalia	Arthropoda	Insecta	Diverse/Unspecified	Diverse/Unspecified	Diverse/Unspecified	Diverse/Unspecified		lawn/garden/golf course introduced insects	Terrestrial	terrestrial					North America	USA		Unspecified	Country	2000	Year	2000	Unspecified	2000	2000	Potentially ongoing	1500000000			2135188008	2135188008	1500000000	2135188008	2135188008	USD	2000	Publication year	Observed
1566	TC	320	Factors Shaping and Shaped by the Environment: 1990-2010	Coates		1991	English	Book chapter	Batabyal, A. A., & Nijkamp, P. (2007). The stochastic arrival of alien species and the number of and the damage from biological invasions. Ecological Economics, 62(2), 277–280. https://doi.org/10.1016/j.ecolecon.2007.02.030 --> OTA. (1993). Harmful Non-Indigenous Species in the United States. Ota-F-565, (September). Retrieved from https://www.anstaskforce.gov/Documents/OTA_Report_1993.pdf	No	Animalia	Arthropoda	Insecta	Hemiptera	Aphididae	Diuraphis	Diuraphis noxia		Russian wheat aphid	Terrestrial	terrestrial					North America	USA		Unspecified	Country	1987-1989	Period	1987	1989	1987	1989	Potentially ongoing	600000000			1079888025	1079888025	200000000	3.59963e+08	3.59963e+08	USD	1991	Effective	Observed
1578	TC	291	Environmental valuation and the Hawaiian economy	Kaiser et al		1999	English	Official report	NA	Yes	Animalia	Arthropoda	Insecta	Blattodea	Rhinotermitidae	Coptotermes	Coptotermes formosanus		Formosan termite	Terrestrial	terrestrial					Oceania/Pacific Islands	USA	Hawaii	Hawaii	Site	1984	Year	1984	Unspecified	1984	1984	Potentially ongoing	150000000			2.2906e+08	2.2906e+08	150000000	2.2906e+08	2.2906e+08	USD	1997	Effective	Observed
1579	TC	291	Environmental valuation and the Hawaiian economy	Kaiser et al		1999	English	Official report	NA	Yes	Animalia	Arthropoda	Insecta	Blattodea	Rhinotermitidae	Coptotermes	Coptotermes formosanus		Formosan termite	Terrestrial	terrestrial					Oceania/Pacific Islands	USA	Hawaii	Hawaii	Site	1997	Year	1997	Unspecified	1997	1997	Potentially ongoing	30000000			4.5812e+07	4.5812e+07	30000000	4.5812e+07	4.5812e+07	USD	1997	Effective	Observed
1580	TC	291	Environmental valuation and the Hawaiian economy	Kaiser et al		1999	English	Official report	NA	Yes	Animalia	Arthropoda	Insecta	Blattodea	Rhinotermitidae	Coptotermes	Coptotermes formosanus		Formosan termite	Terrestrial	terrestrial					Oceania/Pacific Islands	USA	Hawaii	Hawaii	Site	1999	Year	1999	Unspecified	1999	1999	Potentially ongoing	350000			515034	515034	350000	515034	515034	USD	1999	Publication year	Observed
1582	TC	608	USDA APHIS/FS 2000	United States Department of Agriculture		2000	English	Official report	Chornesky, E. A., Bartuska, A. M., Aplet, G. H., Britton, K. O., Cummings-Carlson, J., Davis, F. W., … Wigley, T. B. (2005). Science priorities for reducing the threat of invasive species to sustainable forestry. Bioscience, 55(4), 335–348. https://doi.org/10.1641/0006-3568(2005)055{[}0335:SPFRTT]2.0.CO;2 ID 13175	No	Animalia	Arthropoda	Insecta	Lepidoptera	Erebidae	Lymantria	Lymantria monacha		Nun moth	Terrestrial	terrestrial					North America	USA		Unspecified	Country	30 years	Period	2000	2030	2000	2030	Potentially ongoing	2500000000			3558646680	3558646680	8.33333e+07	118621556	118621556	USD	2000	Publication year	Potential
1583	TC	608	USDA APHIS/FS 2000	United States Department of Agriculture		2000	English	Official report	Chornesky, E. A., Bartuska, A. M., Aplet, G. H., Britton, K. O., Cummings-Carlson, J., Davis, F. W., … Wigley, T. B. (2005). Science priorities for reducing the threat of invasive species to sustainable forestry. Bioscience, 55(4), 335–348. https://doi.org/10.1641/0006-3568(2005)055{[}0335:SPFRTT]2.0.CO;2 ID 13175	No	Animalia	Arthropoda	Insecta	Hymenoptera	Siricidae	Sirex	Sirex noctilio		Sirex woodwasp	Terrestrial	terrestrial					North America	USA		3 cities	Site	30 years	Period	2000	2030	2000	2030	Potentially ongoing	760000000			1081828591	1081828591	2.53333e+07	3.6061e+07	3.6061e+07	USD	2000	Publication year	Potential
1584	TC	154	69 Fed. Reg. 55719–55733	Anonymous		2004	English	Official report	Chornesky, E. A., Bartuska, A. M., Aplet, G. H., Britton, K. O., Cummings-Carlson, J., Davis, F. W., … Wigley, T. B. (2005). Science priorities for reducing the threat of invasive species to sustainable forestry. Bioscience, 55(4), 335–348. https://doi.org/10.1641/0006-3568(2005)055{[}0335:SPFRTT]2.0.CO;2 ID 13175	No	Animalia	Arthropoda	Insecta	Coleoptera	Buprestidae	Agrilus	Agrilus planipennis		Emerald ash borer	Terrestrial	terrestrial					North America	USA		Michigan/Ohio/Indiana	Site	2002-2005	Period	2002	2005	2002	2005	One-time	14666666667			14275030883	14275030883	2750000000	3568757721	3568757721	USD	2004	Publication year	Observed
1585	TC	154	69 Fed. Reg. 55719–55733	Anonymous		2005	English	Official report	Chornesky, E. A., Bartuska, A. M., Aplet, G. H., Britton, K. O., Cummings-Carlson, J., Davis, F. W., … Wigley, T. B. (2005). Science priorities for reducing the threat of invasive species to sustainable forestry. Bioscience, 55(4), 335–348. https://doi.org/10.1641/0006-3568(2005)055{[}0335:SPFRTT]2.0.CO;2 ID 13175	No	Animalia	Arthropoda	Insecta	Coleoptera	Buprestidae	Agrilus	Agrilus planipennis		Emerald ash borer	Terrestrial	terrestrial					North America	USA		Michigan/Ohio/Indiana	Site	2005	Year	2005	Unspecified	2005	2005	Potentially ongoing	2000000			2.51029e+06	2.51029e+06	2000000	2.51029e+06	2.51029e+06	USD	2005	Publication year	Observed
1586	TC	608	USDA APHIS/FS 2000	United States Department of Agriculture		2000	English	Official report	Chornesky, E. A., Bartuska, A. M., Aplet, G. H., Britton, K. O., Cummings-Carlson, J., Davis, F. W., … Wigley, T. B. (2005). Science priorities for reducing the threat of invasive species to sustainable forestry. Bioscience, 55(4), 335–348. https://doi.org/10.1641/0006-3568(2005)055{[}0335:SPFRTT]2.0.CO;2 ID 13175	No	Animalia	Arthropoda	Insecta	Lepidoptera	Erebidae	Lymantria	Lymantria dispar		Nun moth	Terrestrial	terrestrial					North America	USA		19 states	Site	1981	Year	1981	Unspecified	1981	1981	Potentially ongoing	3900000000			5864524564	5864524564	3900000000	5864524564	5864524564	USD	1998	Effective	Observed
1589	WoS	10194	An agent-based model of border enforcement for invasive species management.	Ameden et al		2009	English	Peer-reviewed article	NA	Yes	Animalia	Arthropoda	Insecta	Coleoptera	Chrysomelidae	Phyllotreta	Phyllotreta cruciferae		Crucifer flea beetle	Terrestrial	terrestrial					North America	USA		California	Site	2009	Year	2009	Unspecified	2009	2009	Potentially ongoing	141150000	131900000	150400000	1.61271e+08	1.61271e+08	141150000	1.61271e+08	1.61271e+08	USD	2009	Publication year	Potential
1590	GS	103	Forest Product Trade Impacts of an Invasive Species: Modeling Structure and Intervention Trade-Offs	Prestemon et al		2006	English	Peer-reviewed article	NA	Yes	Animalia	Arthropoda	Insecta	Lepidoptera	Erebidae	Lymantria	Lymantria dispar/Lymantria monacha		Asian gypsy/Nun moth	Terrestrial	terrestrial					North America	USA		Unspecified	Country	2006	Year	2006	Unspecified	2006	2006	Potentially ongoing	60000000			7.29553e+07	7.29553e+07	60000000	7.29553e+07	7.29553e+07	USD	2006	Publication year	Potential
1591	GS	103	Forest Product Trade Impacts of an Invasive Species: Modeling Structure and Intervention Trade-Offs	Prestemon et al		2006	English	Peer-reviewed article	NA	Yes	Animalia	Arthropoda	Insecta	Lepidoptera	Erebidae	Lymantria	Lymantria dispar/Lymantria monacha		Asian gypsy/Nun moth	Terrestrial	terrestrial					North America	USA		Unspecified	Country	2006	Year	2006	Unspecified	2006	2006	Potentially ongoing	27000000	5000000	49000000	3.28299e+07	3.28299e+07	27000000	3.28299e+07	3.28299e+07	USD	2006	Publication year	Potential
1598	TC	356	http://www.fs.fed.us/ ne/morgantown/4557/gmoth	Unknown		2002	English	Web page	Nealis V.G (2002) Gypsy Moth in Canada: Case Study of an Invasive Insect. In Claudi, R., Nantel, P., Muckle-Jeffs, E. (eds), Alien Invaders in Canada's Waters, Wetlands and Forests.	No	Animalia	Arthropoda	Insecta	Lepidoptera	Erebidae	Lymantria	Lymantria dispar		Gypsy moth	Terrestrial	terrestrial					North America	USA		Unspecified	Unit (4.5 million Ha)	1980-1998	Period	1980	1998	1980	1998	One-time	1.88417e+08			2.43246e+08	2.43246e+08	9.39474e+06	1.28024e+07	1.28024e+07	USD	2002	Publication year	Observed
1599	TC	398	Lymantria dispar (L.), gypsy moth (Lepidoptera:Lymantriidae). In P. Mason and J. Huber, eds. Biological control programmes against insects and mites, weeds, and pathogens in Canada 1981–2000. CABI Publishing, Wallingford, Oxon, UK.	van Frankenhuyzen		1990	English	Book chapter	Nealis V.G (2002) Gypsy Moth in Canada: Case Study of an Invasive Insect. In Claudi, R., Nantel, P., Muckle-Jeffs, E. (eds), Alien Invaders in Canada's Waters, Wetlands and Forests.	No	Animalia	Arthropoda	Insecta	Lepidoptera	Erebidae	Lymantria	Lymantria dispar		Gypsy moth	Terrestrial	terrestrial					North America	Canada		Ontario	Site	1986-1991	Period	1986	1991	1986	1991	One-time	5000000			8.0394e+06	7.56396e+06	833333	1.3399e+06	1.26066e+06	CAD	1990	Publication year	Observed
1600	TC	341	Gypsy Moth in Canada: Case Study of an Invasive Insect	Nealis		2002	English	Book	NA	Yes	Animalia	Arthropoda	Insecta	Lepidoptera	Erebidae	Lymantria	Lymantria dispar		Asian/European gypsy moths	Terrestrial	terrestrial					North America	Canada		Vancouver	Site	1992	Year	1992	Unspecified	1992	1992	Potentially ongoing	6500000			9.39409e+06	9.24746e+06	6500000	9.39409e+06	9.24746e+06	CAD	1992	Effective	Observed
1601	TC	341	Gypsy Moth in Canada: Case Study of an Invasive Insect	Nealis		2002	English	Book	NA	Yes	Animalia	Arthropoda	Insecta	Lepidoptera	Erebidae	Lymantria	Lymantria dispar		Asian/European gypsy moths	Terrestrial	terrestrial					North America	Canada		South Vancouver Island	Site	1999	Year	1999	Unspecified	1999	1999	Potentially ongoing	3700000			3.66462e+06	4.57222e+06	3700000	3.66462e+06	4.57222e+06	CAD	1999	Effective	Observed
1602	TC	341	Gypsy Moth in Canada: Case Study of an Invasive Insect	Nealis		2002	English	Book	NA	Yes	Animalia	Arthropoda	Insecta	Lepidoptera	Erebidae	Lymantria	Lymantria dispar		Gypsy moth	Terrestrial	terrestrial					North America	Canada		British Columbia	Site	2002	Year	2002	Unspecified	2002	2002	Potentially ongoing	250000			217088	277126	250000	217088	277126	CAD	2002	Publication year	Observed
1603	TC	341	Gypsy Moth in Canada: Case Study of an Invasive Insect	Nealis		2002	English	Book chapter	NA	Yes	Animalia	Arthropoda	Insecta	Lepidoptera	Erebidae	Lymantria	Lymantria dispar		Gypsy moth	Terrestrial	terrestrial					North America	Canada		British Columbia	Site	2002	Year	2002	Unspecified	2002	2002	Potentially ongoing	20000000			1.73671e+07	2.21701e+07	20000000	1.73671e+07	2.21701e+07	CAD	2002	Publication year	Potential
1604	TC	471	Potential effect of the Asian longhorned beetle (Coleoptera: Cerambycidae) on urban trees in the United States	Nowak et al		2001	English	Official report	Kettunen, M., Genovesi, P., Gollasch, S., Pagad, S., Starfinger, U., ten Brink, P., & Shine, C. (2009). Technical support to EU strategy on invasive alien species (IAS) - Assessment of the impacts of IAS in Europe and the EU. Brussels, Belgium.	Yes	Animalia	Arthropoda	Insecta	Diptera	Culicidae	Aedes	Aedes albopictus		Asian tiger mosquito	Terrestrial	semi-aquatic					North America	USA		Unspecified	Country	2001	Year	2001	Unspecified	2001	2001	Potentially ongoing	1310000			1.62279e+06		1310000	1.62279e+06		EUR	2001	Publication year	Observed
1620	TC	478	Program Planning Advisory Committees 2003 Report: ANR Critical Issues	University of California Agriculture and Natural Resources		2003	English	Official report	Eaves, J., Richards, T. J., Manfredo, M. R., & Fournier, V. (2005). Managing Economic Risk from Invasive Species : Bug Options. Agricultural Economics.	No	Animalia	Arthropoda	Insecta	Hemiptera	Cicadellidae	Homalodisca	Homalodisca vitripennis		Glassy-winged sharpshooter	Terrestrial	terrestrial					North America	USA		California	Site	Unspecified	Year	Unspecified	Unspecified	2003	2003	Potentially ongoing	3300000000			4397162174	4397162174	3300000000	4397162174	4397162174	USD	2003	Publication year	Potential
1621	Go	73	Managing Economic Risk from Invasive Species : Bug Options	Eaves et al		2005	English	Conference proceedings	NA	Yes	Animalia	Arthropoda	Insecta	Hemiptera	Aleyrodidae	Bemisia	Bemisia tabaci		Tobacco whitefly	Terrestrial	terrestrial					North America	USA		Brawley (CA research station)	Site	Unspecified	Year	Unspecified	Unspecified	2005	2005	One-time	66461			83418.3	83418.3	66461	83418.3	83418.3	USD	2005	Publication year	Potential
1622	Go	46	Economic Impacts of Invasive Species in the Pacific Northwest Economic Region	PNWER Invasive Species Working Group		2012	English	Official report	NA	Yes	Animalia	Arthropoda	Insecta	Coleoptera	Curculionidae	Anthonomus	Anthonomus grandis		Boll weevil	Terrestrial	terrestrial					North America	USA		Unspecified	Country	Since 1890s (Until 2012 = publication year)	Period	1890	Unspecified	1890	2012	Potentially ongoing	406504065			4.33993e+08	4.33993e+08	3.30491e+06	3.5284e+06	3.5284e+06	USD	2012	Publication year	Observed
1623	Go	46	Economic Impacts of Invasive Species in the Pacific Northwest Economic Region	PNWER Invasive Species Working Group		2012	English	Official report	NA	Yes	Animalia	Arthropoda	Insecta	Lepidoptera	Erebidae	Lymantria	Lymantria dispar		Asian gypsy moth	Terrestrial	terrestrial					North America	USA		Western U.S. forests	Site	Unspecified	Year	Unspecified	Unspecified	2012	2012	One-time	20000000			2.13524e+07	2.13524e+07	20000000	2.13524e+07	2.13524e+07	USD	2012	Publication year	Observed
1624	Go	46	Economic Impacts of Invasive Species in the Pacific Northwest Economic Region	PNWER Invasive Species Working Group		2012	English	Official report	NA	Yes	Animalia	Arthropoda	Insecta	Lepidoptera	Erebidae	Lymantria	Lymantria dispar		Gypsy moths	Terrestrial	terrestrial					North America	USA		Eastern U.S. forests	Site	1981	Year	1981	Unspecified	1981	1981	Potentially ongoing	764000000			8.15663e+08	8.15663e+08	764000000	8.15663e+08	8.15663e+08	USD	2012	Publication year	Observed
1629	Go	83	Pre-invasion economic assessment of invasive species prevention: A putative ambrosia beetle in Southeastern loblolly pine forests.	Susaeta et al		2016	English	Peer-reviewed article	NA	Yes	Animalia	Arthropoda	Insecta	Coleoptera	Curculionidae	Diverse/Unspecified	Diverse/Unspecified		Ambrosia beetle	Terrestrial	terrestrial					North America	USA		Southeastern USA	Site	Unspecified	Year	Unspecified	Unspecified	2016	2016	Potentially ongoing	4600000000			4762897445	4762897445	4600000000	4762897445	4762897445	USD	2014	Effective	Potential
1630	Go	83	Pre-invasion economic assessment of invasive species prevention: A putative ambrosia beetle in Southeastern loblolly pine forests.	Susaeta et al		2016	English	Peer-reviewed article	NA	Yes	Animalia	Arthropoda	Insecta	Diverse/Unspecified	Diverse/Unspecified	Diverse/Unspecified	Diverse/Unspecified		Diverse (Wood-infesting insects)	Terrestrial	terrestrial					North America	USA		Unspecified	Country	2014	Year	2014	Unspecified	2014	2014	Potentially ongoing	300000			310624	310624	300000	310624	310624	USD	2014	Effective	Observed
1631	Go	90	The Actual and Potential Economic Impact of Invasive Species on the Adirondack Park : A Preliminary Assessment	Yellow Wood Associates Inc.		2014	English	Official report	NA	Yes	Animalia	Arthropoda	Insecta	Coleoptera	Cerambycidae	Anoplophora	Anoplophora glabripennis		Asian long-horned beetle	Terrestrial	terrestrial					North America	USA		New York (Adirondacks)	Site	2011	Year	2011	Unspecified	2011	2011	Potentially ongoing	30000000			3.26914e+07	3.26914e+07	30000000	3.26914e+07	3.26914e+07	USD	2011	Effective	Potential
1632	Go	90	The Actual and Potential Economic Impact of Invasive Species on the Adirondack Park : A Preliminary Assessment	Yellow Wood Associates Inc.		2014	English	Official report	NA	Yes	Animalia	Arthropoda	Insecta	Coleoptera	Cerambycidae	Anoplophora	Anoplophora glabripennis		Asian long-horned beetle	Terrestrial	terrestrial					North America	USA		New York (Adirondacks)	Site	2014	Year	2014	Unspecified	2014	2014	Potentially ongoing	1500000			1.55312e+06	1.55312e+06	1500000	1.55312e+06	1.55312e+06	USD	2014	Effective	Potential
1633	Go	90	The Actual and Potential Economic Impact of Invasive Species on the Adirondack Park : A Preliminary Assessment	Yellow Wood Associates Inc.		2014	English	Official report	NA	Yes	Animalia	Arthropoda	Insecta	Coleoptera	Cerambycidae	Anoplophora	Anoplophora glabripennis		Asian long-horned beetle	Terrestrial	terrestrial					North America	USA		New York (Adirondacks)	Site	2013	Year	2013	Unspecified	2013	2013	Potentially ongoing	650000			683936	683936	650000	683936	683936	USD	2013	Effective	Potential
1634	TC	605	Trapping Asian Longhorned Beetles	Schwartzberg		2013	English	Official report	Yellow Wood Associates Inc. (2014). The Actual and Potential Economic Impact of Invasive Species on the Adirondack Park : A Preliminary Assessment.	Yes	Animalia	Arthropoda	Insecta	Coleoptera	Cerambycidae	Anoplophora	Anoplophora glabripennis		Asian long-horned beetle	Terrestrial	terrestrial					North America	USA		Unspecified	Country	1997-2006	Period	1997	2006	1997	2006	One-time	800000000			8.41767e+08	8.41767e+08	80000000	8.41767e+07	8.41767e+07	USD	2013	Publication year	Observed
1635	TC	287	Emerging Threats To Iowa’s Forests, Communities, Wood Industry & Economy: Asian Longhorned Beetle	Iowa Department of Natural Resources		2013	English	Official report	Yellow Wood Associates Inc. (2014). The Actual and Potential Economic Impact of Invasive Species on the Adirondack Park : A Preliminary Assessment.	Yes	Animalia	Arthropoda	Insecta	Coleoptera	Cerambycidae	Anoplophora	Anoplophora glabripennis		Asian long-horned beetle	Terrestrial	terrestrial					North America	USA		Iowa	Site	2013	Year	2013	Unspecified	2013	2013	Potentially ongoing	18000000			1.89398e+07	1.89398e+07	18000000	1.89398e+07	1.89398e+07	USD	2013	Publication year	Potential
1636	Go	90	The Actual and Potential Economic Impact of Invasive Species on the Adirondack Park : A Preliminary Assessment	Yellow Wood Associates Inc		2014	English	Official report	NA	Yes	Animalia	Arthropoda	Insecta	Coleoptera	Buprestidae	Agrilus	Agrilus planipennis		Emerald ash borer	Terrestrial	terrestrial				Y	North America	USA		New York	Site	2014	Year	2014	Unspecified	2014	2014	Potentially ongoing	2000000			2.07082e+06	2.07082e+06	2000000	2.07082e+06	2.07082e+06	USD	2014	Publication year	Observed
1637	TC	287	Emerging Threats To Iowa’s Forests, Communities, Wood Industry & Economy: Asian Longhorned Beetle	Iowa Department of Natural Resources		2013	English	Official report	Yellow Wood Associates Inc. (2014). The Actual and Potential Economic Impact of Invasive Species on the Adirondack Park : A Preliminary Assessment.	Yes	Animalia	Arthropoda	Insecta	Coleoptera	Buprestidae	Agrilus	Agrilus planipennis		Emerald ash borer	Terrestrial	terrestrial					North America	USA		Iowa	Site	2013	Year	2013	Unspecified	2013	2013	Potentially ongoing	11000000			1.15743e+07	1.15743e+07	11000000	1.15743e+07	1.15743e+07	USD	2013	Publication year	Potential
1638	Go	90	The Actual and Potential Economic Impact of Invasive Species on the Adirondack Park : A Preliminary Assessment	Yellow Wood Associates Inc.		2014	English	Official report	NA	Yes	Animalia	Arthropoda	Insecta	Coleoptera	Buprestidae	Agrilus	Agrilus planipennis		Emerald ash borer	Terrestrial	terrestrial					North America	USA		New York (Adirondacks)	Site	2014	Year	2014	Unspecified	2014	2014	Potentially ongoing	80000			82833	82833	80000	82833	82833	USD	2014	Effective	Potential
1639	Go	90	The Actual and Potential Economic Impact of Invasive Species on the Adirondack Park : A Preliminary Assessment	Yellow Wood Associates Inc		2014	English	Official report	NA	Yes	Animalia	Arthropoda	Insecta	Coleoptera	Buprestidae	Agrilus	Agrilus planipennis		Emerald ash borer	Terrestrial	terrestrial				Y	North America	USA		Washington (Ulster county)	Site	Unspecified	Year	Unspecified	Unspecified	2014	2014	Potentially ongoing	469280			485898	485898	469280	485898	485898	USD	2014	Effective	Observed
1640	Go	90	The Actual and Potential Economic Impact of Invasive Species on the Adirondack Park : A Preliminary Assessment	Yellow Wood Associates Inc.		2014	English	Official report	NA	Yes	Animalia	Arthropoda	Insecta	Coleoptera	Buprestidae	Agrilus	Agrilus planipennis		Emerald ash borer	Terrestrial	terrestrial					North America	USA		New York (Adirondack Park)	Unit (Park)	2014	Year	2014	2014	2014	2014	Potentially ongoing	16500000			1.70843e+07	1.70843e+07	16500000	1.70843e+07	1.70843e+07	USD	2014	Effective	Potential
1641	Go	90	The Actual and Potential Economic Impact of Invasive Species on the Adirondack Park : A Preliminary Assessment	Yellow Wood Associates Inc.		2014	English	Official report	NA	Yes	Animalia	Arthropoda	Insecta	Coleoptera	Buprestidae	Agrilus	Agrilus planipennis		Emerald ash borer	Terrestrial	terrestrial					North America	USA		Unspecified	Country	2014	Year	2014	2014	2014	2014	Potentially ongoing	1540000000			1594535232	1594535232	1540000000	1594535232	1594535232	USD	2014	Effective	Potential
1642	Go	90	The Actual and Potential Economic Impact of Invasive Species on the Adirondack Park : A Preliminary Assessment	Yellow Wood Associates Inc		2014	English	Official report	NA	Yes	Animalia	Arthropoda	Insecta	Diptera	Lauxaniidae	Drosophila	Drosophila suzukii		Spotted Wing Drosophila	Terrestrial	terrestrial				Y	North America	USA		New York	Site	2012	Year	2012	Unspecified	2012	2012	Potentially ongoing	2500000	2000000	3000000	2.66906e+06	2.66906e+06	2500000	2.66906e+06	2.66906e+06	USD	2012	Effective	Observed
1643	Go	90	The Actual and Potential Economic Impact of Invasive Species on the Adirondack Park : A Preliminary Assessment	Yellow Wood Associates Inc.		2014	English	Official report	NA	Yes	Animalia	Arthropoda	Insecta	Diptera	Lauxaniidae	Drosophila	Drosophila suzukii		Spotted Wing Drosophila	Terrestrial	terrestrial					North America	USA		New York	Site	2012	Year	2012	Unspecified	2012	2012	Potentially ongoing	101250	22500	180000	108097	108097	101250	108097	108097	USD	2012	Effective	Potential
1644	TC	594	The Silent Invasion	CGAPS		1999	English	Official report	IKUMA, E. K., SUGANO, D., & MARDFIN, J. K. (2002). Filling the Gaps in the Fight Against Invasive Species. Honolulu, Hawaii.	No	Animalia	Arthropoda	Insecta	Diverse/Unspecified	Diverse/Unspecified	Diverse/Unspecified	Diverse/Unspecified		4 new sugarcane pest insects	Terrestrial	terrestrial					Oceania/Pacific Islands	USA	Hawaii	Hawaii	Site	1985-2002	Period	1985	2002	1985	2002	Potentially ongoing	9000000			1.32437e+07	1.32437e+07	500000	735763	735763	USD	1999	Publication year	Observed
1645	WoS	5156	Incentivizing the Public to Support Invasive Species Management : Eurasian Milfoil Reduces Lakefront Property Values	Olden and Tamayo		2014	English	Peer-reviewed article	NA	Yes	Plantae	Tracheophyta	Magnoliopsida	Saxifragales	Haloragaceae	Myriophyllum	Myriophyllum spicatum		Eurasian milfoil	Aquatic	aquatic					North America	USA		Lake George (New York)	Unit (Lake)	1985-2010	Period	1985	2010	1985	2010	One-time	8580000			1.18776e+07	1.18776e+07	330000	456831	456831	USD	2001	Publication year	Observed
1646	WoS	5156	Incentivizing the Public to Support Invasive Species Management : Eurasian Milfoil Reduces Lakefront Property Values	Olden and Tamayo		2014	English	Peer-reviewed article	NA	Yes	Plantae	Tracheophyta	Magnoliopsida	Saxifragales	Haloragaceae	Myriophyllum	Myriophyllum spicatum		Eurasian milfoil	Aquatic	aquatic					North America	USA		Lake George (New York)	Unit (Lake)	Unspecified	Year	Unspecified	Unspecified	2014	2014	Potentially ongoing	377542			390912	390912	377542	390912	390912	USD	2014	Publication year	Potential
1655	TC	50	Progress of the 2010 Spartina eradication program	Washington State Department of Agriculture		2011	English	Official report	NA	Yes	Plantae	Tracheophyta	Liliopsida	Poales	Poaceae	Sporobolus	Sporobolus alterniflorus		Smooth cordgrass	Aquatic	semi-aquatic					North America	USA		Estuarie of Washingon state	Site	2010-2011	Year	2010	2011	2011	2011	One-time	1155000			1.29835e+06	1.29835e+06	1155000	1.29835e+06	1.29835e+06	USD	2010	Publication year	Observed
1656	WoS	11991	Economic Impacts of Zebra Mussels on Drinking Water Treatment and Electric Power Generation Facilities	Connelly et al		2007	English	Peer-reviewed article	NA	Yes	Animalia	Mollusca	Bivalvia	Myida	Dreissenidae	Dreissena	Dreissena polymorpha/Dreissena bugensis		Zebra mussel	Aquatic	aquatic					North America	Canada/USA		North America & Canadian provinces	Regional	1989-2004	Period	1989	2004	1989	2004	Potentially ongoing	284800000	171680000	498080000	3.69594e+08		17800000	2.30996e+07		USD	2004	Effective	Observed
1704	TC	44	Biological control of Melaleuca quinquenervia: prospects and conflicts	Balciunas & Center		1991	English	Conference proceedings	Serbesoff-king 2003 Melaleuca in Florida : A Literature Review on the Taxonomy , Distribution , Biology , Ecology , Economic Importance and Control Measures	No	Plantae	Tracheophyta	Magnoliopsida	Myrtales	Myrtaceae	Melaleuca	Melaleuca quinquenervia		Broad-leaved paperbark	Terrestrial	semi-aquatic					North America	USA		South Florida	Site	1991-2010	Period	1991	2010	1991	2010	Potentially ongoing	2000000000			3599626752	3599626752	100000000	1.79981e+08	1.79981e+08	USD	1991	Publication year	Potential
1705	TC	43	Benefit-Cost Analysis of Melaleuca Management in South Florida	Carter-finn et al		2006	English	Official report	NA	Yes	Plantae	Tracheophyta	Magnoliopsida	Myrtales	Myrtaceae	Melaleuca	Melaleuca quinquenervia		Broad-leaved paperbark	Terrestrial	semi-aquatic					North America	USA		South Florida	Site	2003	Year	2003	Unspecified	2003	2003	Potentially ongoing	26175000			3.48775e+07	3.48775e+07	26175000	3.48775e+07	3.48775e+07	USD	2003	Publication year	Observed
1706	TC	46	Economic impact statement: the addition of Melaleuca quinquenervia to the Florida prohibited aquatic plant list	Diamond et al		1991	English	Conference proceedings	Serbesoff-king 2003 Melaleuca in Florida : A Literature Review on the Taxonomy , Distribution , Biology , Ecology , Economic Importance and Control Measures	No	Plantae	Tracheophyta	Magnoliopsida	Myrtales	Myrtaceae	Melaleuca	Melaleuca quinquenervia		Broad-leaved paperbark	Terrestrial	semi-aquatic					North America	USA		South Florida	Site	Unspecified	Year	Unspecified	Unspecified	1991	1991	Potentially ongoing	168000000			3.02369e+08	3.02369e+08	168000000	3.02369e+08	3.02369e+08	USD	1991	Publication year	Observed
1707	TC	419	MELALEUCA MANAGEMENT PLAN TEN YEARS OF SUCCESSFUL MELALEUCA MANAGEMENT IN FLORIDA 1988 - 1998	Laroche		1999	English	Official report	Serbesoff-king 2003 Melaleuca in Florida : A Literature Review on the Taxonomy , Distribution , Biology , Ecology , Economic Importance and Control Measures	Yes	Plantae	Tracheophyta	Magnoliopsida	Myrtales	Myrtaceae	Melaleuca	Melaleuca quinquenervia		Broad-leaved paperbark	Terrestrial	semi-aquatic					North America	USA	Florida	South Florida	Site	1988-1998	Period	1988	1998	1988	1998	One-time	25000000			3.67882e+07	3.34438e+06	2.27273e+06	3.34438e+06	3.34438e+06	USD	1999	Publication year	Observed
1708	WoS	2586	Invasive species triggers a massive loss of ecosystem services through a trophic cascade	Walsh et al		2016	English	Peer-reviewed article	NA	Yes	Animalia	Arthropoda	Branchiopoda	Diplostraca	Cercopagidae	Bythotrephes	Bythotrephes longimanus		Spiny water flea	Aquatic	aquatic					North America	USA		Dane County	Site	2016	Year	2016	2016	2016	2016	One-time	6250000	4300000	8200000	6.38313e+06	6.38313e+06	6250000	6.38313e+06	6.38313e+06	USD	2016	Publication year	Potential
1710	WoS	5291	Effectiveness of a hand removal program for management of nonindigenous Apple snails in an urban pond	Bernatis and Warren		2014	English	Peer-reviewed article	NA	Yes	Animalia	Mollusca	Gastropoda	Architaenioglossa	Ampullariidae	Pomacea	Pomacea maculata/Pomacea canaliculata		Apple snail	Aquatic	aquatic					North America	USA		One pond in southeast Jacksonville, FL	Unit (1.62 Ha)	2008-2011	Period	2008	2011	2008	2011	One-time	41900			43383.8	43383.8	10475	10846	10846	USD	2014	Publication year	Observed
1712	WoS	15749	Benefits and Costs of the Ruffe Control Program for the Great Lakes Fishery	Leigh		1998	English	Peer-reviewed article	NA	Yes	Animalia	Chordata	Actinopterygii	Perciformes	Percidae	Gymnocephalus	Gymnocephalus cernua		Ruffe	Aquatic	aquatic					North America	USA		Great Lakes	Country	11 years	Period	1998	2009	1998	2009	Potentially ongoing	11990000			1.80297e+07	1.80297e+07	1090000	1.63906e+06	1.63906e+06	USD	1998	Publication year	Potential
1716	WoS	16846	Impacts of Northern Pike on Stocked Rainbow Trout in Pactola Reservoir, South Dakota	Scheibel et al		2016	English	Peer-reviewed article	NA	Yes	Animalia	Chordata	Actinopterygii	Esociformes	Esocidae	Esox	Esox lucius		Northen pike	Aquatic	aquatic					North America	USA		South Dakota (Pactola Reservoir)	Site	2016	Year	2016	Unspecified	2016	2016	Potentially ongoing	20000			20683.7	20683.7	20000	20683.7	20683.7	USD	2015	Publication year	Potential
1717	WoS	11523	Preventing the Spread of Invasive Species : Economic Benefits of Intervention Guided by Ecological Predictions	Keller et al		2008	English	Peer-reviewed article	NA	Yes	Animalia	Arthropoda	Malacostraca	Decapoda	Cambaridae	Orconectes	Orconectes rusticus		rusty crayfish	Aquatic	aquatic					North America	USA		Vilas County	Site	2005	Year	2005	Unspecified	2005	2005	Potentially ongoing	1505205			1.88925e+06	1.88925e+06	1505205	1.88925e+06	1.88925e+06	USD	2005	Effective	Potential
1718	WoS	11523	Preventing the Spread of Invasive Species : Economic Benefits of Intervention Guided by Ecological Predictions	Keller et al		2008	English	Peer-reviewed article	NA	Yes	Animalia	Arthropoda	Malacostraca	Decapoda	Cambaridae	Orconectes	Orconectes rusticus		Rusty crayfish	Aquatic	aquatic					North America	USA		Vilas County	Site	2008	Year	2008	Unspecified	2008	2008	Potentially ongoing	1505000			1.88899e+06	1.88899e+06	1505000	1.88899e+06	1.88899e+06	USD	2005	Effective	Observed
1719	WoS	3330	Tradeoff between Assessment and Control of Aquatic Invasive Species : A Case Study of Sea Lamprey Management in the St . Marys River	Robinson et al		2016	English	Peer-reviewed article	NA	Yes	Animalia	Chordata	Cephalaspidomorphi	Petromyzontiformes	Petromyzontidae	Petromyzon	Petromyzon marinus		Sea lamprey	Aquatic	aquatic					North America	USA		Saint Marys river	Unit (River)	2016	Year	2016	Unspecified	2016	2016	Potentially ongoing	100000	100000	2000000	102130	102130	100000	102130	102130	USD	2016	Publication year	Potential
1724	TC	47	Historical review of Asiatic clam (Corbicula) invasion and biofouling of waters and industries in the Americas. In: Britton, J.C. (Ed.), Proceedings of the Second International Corbicula Symposium, 2nd ed.: American Malacological Bulletin — Special edition, 2, pp. 1–5.	Isom		1986	English	Conference proceedings	Rosal et al. 2011	No	Animalia	Mollusca	Bivalvia	Venerida	Cyrenidae	Corbicula	Corbicula fluminea		Asian clam	Aquatic	aquatic					North America	USA		Unspecified	Country	Unspecified	Year	1986	2017	1986	1986	Potentially ongoing	1000000000			2236322512	2236322512	1000000000	2236322512	2236322512	USD	1986	Publication year	Observed
1726	WoS	14200	An ounce of prevention or a pound of cure: bioeconomic risk analysis of invasive species	Leung et al		2002	English	Peer-reviewed article	NA	Yes	Animalia	Mollusca	Bivalvia	Myida	Dreissenidae	Dreissena	Dreissena polymorpha		Zebra mussel	Aquatic	aquatic					North America	USA		Michigan (Lakes)	Unit (Lake)	1994-2000	Period	1994	2000	1994	2000	One-time	2268000			3.09065e+06	3.09065e+06	324000	441522	441522	USD	2002	Publication year	Potential
1727	WoS	3562	Understanding acceptable level of risk: Incorporating the economic cost of under-managing invasive species	Davidson et al		2015	English	Peer-reviewed article	NA	Yes	Diverse/Unspecified	Diverse/Unspecified	Diverse/Unspecified	Diverse/Unspecified	Diverse/Unspecified	Diverse/Unspecified	Diverse/Unspecified		Aquatic macrophytes	Aquatic	aquatic					North America	USA		Michigan (Lakes)	Site	2015	Year	2015	Unspecified	2015	2015	Potentially ongoing	6460000	6460000	323000000	6.68084e+06	6.68084e+06	6460000	6.68084e+06	6.68084e+06	USD	2015	Publication year	Potential
1728	WoS	15006	Potential Environmental Impacts and Economic Damages of Eurasian Watermilfoil (Myriophyllum spicatum) in Western Nevada and Northeastern California	Eiswerth et al		2000	English	Peer-reviewed article	NA	Yes	Plantae	Tracheophyta	Magnoliopsida	Saxifragales	Haloragaceae	Myriophyllum	Myriophyllum spicatum		Eurasian milfoil	Aquatic	aquatic					North America	USA		Donner Lake/Prosser Creek Reservoir/Pyramid Lake/Lahontan State Recreation Area	Site	Unspecified	Year	Unspecified	Unspecified	2000	2000	Potentially ongoing	500000			751862	751862	500000	751862	751862	USD	1998	Effective	Potential
1729	WoS	8359	Stepping Stones for Biological Invasion: A Bioeconomic Model of Transferable Risk	Warziniack et al		2011	English	Peer-reviewed article	NA	Yes	Animalia	Mollusca	Bivalvia	Myida	Dreissenidae	Dreissena	Dreissena polymorpha/Dreissena bugensis		Zebra mussel	Aquatic	aquatic					North America	USA		Columbia River Basin	Unit (Basin)	1988-2007	Period	1988	2007	1988	2007	Potentially ongoing	1280000000	880000000	1780000000	1394835196	1394835196	64000000	6.97418e+07	6.97418e+07	USD	2011	Publication year	Observed
1731	TC	45	California's reaction to Caulerpa taxifolia: A model for invasive species rapid response	Anderson		2005	English	Peer-reviewed article	NA	Yes	Plantae	Chlorophyta	Ulvophyceae	Bryopsidales	Caulerpaceae	Caulerpa	Caulerpa taxifolia		Killer algae	Aquatic	aquatic					North America	USA		California (Agua Hedionda Lagoon)	Site	2000-2003	Period	2000	2003	2000	2003	One-time	4800000			6.0247e+06	6.0247e+06	1200000	1.50618e+06	1.50618e+06	USD	2005	Publication year	Observed
1733	WoS	3562	Understanding acceptable level of risk: Incorporating the economic cost of under-managing invasive species	Davidson et al		2015	English	Peer-reviewed article	NA	Yes	Animalia	Chordata	Cephalaspidomorphi	Petromyzontiformes	Petromyzontidae	Petromyzon	Petromyzon marinus		Sea lamprey	Aquatic	aquatic					North America	USA		Unspecified	Country	2015	Year	2015	Unspecified	2015	2015	Potentially ongoing	20000000			2.06837e+07	2.06837e+07	20000000	2.06837e+07	2.06837e+07	USD	2015	Publication year	Observed
1735	TC	615	Valuing Non Indigenous Species Control and Native Species Restoration in Lake Huron	Lupi, Hoehn and Christie		1999	English	Official report	Rosaen, A. L., Grover, E. A., & Spencer, C. W. (2012). The costs of aquatic invasive species to Great Lakes states. Anderson Economical Group, East Lansing, MI.	No	Animalia	Chordata	Cephalaspidomorphi	Petromyzontiformes	Petromyzontidae	Petromyzon	Petromyzon marinus		Sea lamprey	Aquatic	aquatic					North America	USA		Lake Huron	Unit (Lake)	1994-1995	Year	1994	1995	1995	1995	One-time	4500000	3200000	5800000	5.99613e+06	5.99613e+06	4500000	5.99613e+06	5.99613e+06	USD	2003	Publication year	Potential
1736	WoS	15749	Benefits and Costs of the Ruffe Control Program for the Great Lakes Fishery	Leigh		1998	English	Peer-reviewed article	NA	Yes	Animalia	Chordata	Actinopterygii	Perciformes	Percidae	Gymnocephalus	Gymnocephalus cernua		Ruffe	Aquatic	aquatic					North America	USA		Great Lakes	Country	1998-2051	Period	1998	2051	1998	2051	Potentially ongoing	28329372000	5685012000	50276376000	42599563585	42599563585	524618000	7.88881e+08	7.88881e+08	USD	1998	Publication year	Potential
1737	WoS	9314	The effect of an aquatic invasive species (Eurasian watermilfoil) on lakefront property values	Zhang and Boyle		2010	English	Peer-reviewed article	NA	Yes	Plantae	Tracheophyta	Magnoliopsida	Saxifragales	Haloragaceae	Myriophyllum	Myriophyllum spicatum		Eurasian milfoil	Aquatic	aquatic					North America	USA		Rutland County Vermont	Unit (ha)	2010	Year	2010	2010	2010	2010	One-time	31369	988	61750	35262.4	35262.4	31369	35262.4	35262.4	USD	2010	Publication year	Observed
1738	TC	439	none	Zhang and Boyle		2010	English	Peer-reviewed article	NA	Yes	Plantae	Tracheophyta	Magnoliopsida	Saxifragales	Haloragaceae	Myriophyllum	Myriophyllum spicatum		Eurasian milfoil	Aquatic	aquatic					North America	USA		Rutland County Vermont	Site	2010	Year	2010	2010	2010	2010	Potentially ongoing	100000			108972	108972	100000	108972	108972	USD	2011	Publication year	Potential
1739	TC	439	none	Horsch & Lewis		2008	English	Conference proceedings	NA	Yes	Plantae	Tracheophyta	Magnoliopsida	Saxifragales	Haloragaceae	Myriophyllum	Myriophyllum spicatum		Eurasian milfoil	Aquatic	aquatic					North America	USA		Wisconsin	Unit (Lake)	2005-2006	Year	2005	2006	2006	2006	One-time	187600			228107	228107	187600	228107	228107	USD	2006	Publication year	Potential
1740	TC	633	Zebra Mussel Control Costs in Surface Water Using Facilities	Park and Hushak		1999	English	Book	Rosaen, A. L., Grover, E. A., & Spencer, C. W. (2012). The costs of aquatic invasive species to Great Lakes states. Anderson Economical Group, East Lansing, MI.	Yes	Animalia	Mollusca	Bivalvia	Myida	Dreissenidae	Dreissena	Dreissena polymorpha/Dreissena bugensis		Zebra mussel	Aquatic	aquatic					North America	USA		Great Lakes	Unit (420 water companies)	1989-1994	Period	1989	1994	1989	1994	One-time	180000000			2.97666e+08	2.97666e+08	30000000	4.9611e+07	4.9611e+07	USD	1994	Publication year	Potential
1741	TC	634	Zebra Mussels Are Spreading Rapidly, USGS News Release	US Geological Survey,		1997	English	Official report	Rosaen, A. L., Grover, E. A., & Spencer, C. W. (2012). The costs of aquatic invasive species to Great Lakes states. Anderson Economical Group, East Lansing, MI.	No	Animalia	Mollusca	Bivalvia	Myida	Dreissenidae	Dreissena	Dreissena polymorpha/Dreissena bugensis		Zebra mussel	Aquatic	aquatic					North America	USA		Great Lakes	Unit (1 paper company)	1994	Year	1994	1994	1994	1994	One-time	1400000			2.31518e+06	2.31518e+06	1400000	2.31518e+06	2.31518e+06	USD	1994	Effective	Observed
1742	WoS	12815	Characterized and projected costs of nonindigenous species in Canada	Colautti, Bailey, van Overdijk, Amundsen, MacIsaac		2006	English	Peer-reviewed article	NA	Yes	Animalia	Mollusca	Bivalvia	Myida	Dreissenidae	Dreissena	Dreissena polymorpha/Dreissena bugensis		Zebra mussel	Aquatic	aquatic					North America	Canada/USA		Great Lakes	Unit (8 power plants)	11 years	Period	1995	2006	1995	2006	One-time	70400000	5500000	16500000	6.74775e+07		6400000	6.13432e+06		CAD	2000	Publication year	Observed
1743	WoS	12815	Characterized and projected costs of nonindigenous species in Canada	Colautti, Bailey, van Overdijk, Amundsen, MacIsaac		2006	English	Peer-reviewed article	NA	Yes	Animalia	Mollusca	Bivalvia	Myida	Dreissenidae	Dreissena	Dreissena bugensis		Quagga mussel	Aquatic	aquatic					North America	Canada/USA		Great Lakes	Unit (230,000 cottages)	2002	Year	2002	2002	2002	2002	One-time	52670000			4.57361e+07		52670000	4.57361e+07		CAD	2002	Effective	Observed
1744	WoS	12815	Characterized and projected costs of nonindigenous species in Canada	Colautti, Bailey, van Overdijk, Amundsen, MacIsaac		2006	English	Peer-reviewed article	NA	Yes	Animalia	Mollusca	Bivalvia	Myida	Dreissenidae	Dreissena	Dreissena bugensis		Quagga mussel	Aquatic	aquatic					North America	Canada/USA		Great Lakes	Regional	2002	Year	2002	2002	2002	2002	One-time	732000			635634		732000	635634		CAD	2002	Effective	Observed
1745	Go	116	Working Paper: The Economic Impacts of Aquatic Invasive Species: A Review of the Literature	Sabrina J. Lovell and Susan F. Stone		2005	English	Official report	NA	No	Animalia	Mollusca	Bivalvia	Myida	Dreissenidae	Dreissena	Dreissena polymorpha/Dreissena bugensis		Zebra mussel	Aquatic	aquatic					North America	USA		Great Lakes	Site	1990-2000	Period	1990	2000	1990	2000	One-time	550000000			909534632	909534632	50000000	8.2685e+07	8.2685e+07	USD	1994	Publication year	Observed
1746	Go	116	Working Paper: The Economic Impacts of Aquatic Invasive Species: A Review of the Literature	Sabrina J. Lovell and Susan F. Stone		2005	English	Official report	NA	No	Animalia	Mollusca	Bivalvia	Myida	Dreissenidae	Dreissena	Dreissena polymorpha/Dreissena bugensis		Zebra mussel	Aquatic	aquatic					North America	USA		35 US states and 3 Canadan provinces	Unit (339 facilities)	1995	Year	1995	1995	1995	1995	One-time	69000000			1.10991e+08	1.10991e+08	69000000	1.10991e+08	1.10991e+08	USD	1995	Publication year	Observed
1747	Go	116	Working Paper: The Economic Impacts of Aquatic Invasive Species: A Review of the Literature	Sabrina J. Lovell and Susan F. Stone		2005	English	Official report	NA	No	Animalia	Mollusca	Bivalvia	Myida	Dreissenidae	Dreissena	Dreissena polymorpha/Dreissena bugensis		Zebra mussel	Aquatic	aquatic					North America	USA		Great Lakes	Site	1992-1994	Period	1992	1994	1992	1994	One-time	26400000			4.03145e+07	4.03145e+07	8800000	1.34382e+07	1.34382e+07	USD	1997	Publication year	Observed
1749	Go	116	Working Paper: The Economic Impacts of Aquatic Invasive Species: A Review of the Literature	Sabrina J. Lovell and Susan F. Stone		2005	English	Official report	NA	No	Animalia	Chordata	Cephalaspidomorphi	Petromyzontiformes	Petromyzontidae	Petromyzon	Petromyzon marinus		Sea lamprey	Aquatic	aquatic					North America	USA		New York	Site	1999	Year	1999	1999	1999	1999	One-time	275000			404670	404670	275000	404670	404670	USD	1999	Publication year	Observed
1750	Go	116	Working Paper: The Economic Impacts of Aquatic Invasive Species: A Review of the Literature	Sabrina J. Lovell and Susan F. Stone		2005	English	Official report	NA	No	Animalia	Chordata	Cephalaspidomorphi	Petromyzontiformes	Petromyzontidae	Petromyzon	Petromyzon marinus		Sea lamprey	Aquatic	aquatic					North America	USA		Michigan	Site	1999	Year	1999	1999	1999	1999	One-time	3000000			4.41458e+06	4.41458e+06	3000000	4.41458e+06	4.41458e+06	USD	1999	Publication year	Observed
1751	Go	116	Working Paper: The Economic Impacts of Aquatic Invasive Species: A Review of the Literature	Sabrina J. Lovell and Susan F. Stone		2005	English	Official report	NA	No	Animalia	Chordata	Actinopterygii	Perciformes	Percidae	Gymnocephalus	Gymnocephalus cernua		Ruffe	Aquatic	aquatic					North America	USA		Lake Erie	Unit (Lake)	1985-1995	Period	1985	1995	1985	1995	Potentially ongoing	6600000000			10616576069	10616576069	600000000	965143279	965143279	USD	1995	Publication year	Potential
1752	Go	116	Working Paper: The Economic Impacts of Aquatic Invasive Species: A Review of the Literature	Sabrina J. Lovell and Susan F. Stone		2005	English	Official report	NA	No	Animalia	Mollusca	Bivalvia	Venerida	Cyrenidae	Corbicula	Corbicula fluminea		Asian clam	Aquatic	aquatic					North America	USA		Unspecified	Country	1993	Year	1993	1993	1993	1993	One-time	4500000			7.63568e+06	7.63568e+06	4500000	7.63568e+06	7.63568e+06	USD	1993	Publication year	Observed
1753	TC	346	Harmful Non-Indigenous Species in the United States	U.S. Congress, Office of Technology Assessment		1993	English	Report	NA	Yes	Animalia	Mollusca	Bivalvia	Myida	Dreissenidae	Dreissena	Dreissena polymorpha/Dreissena bugensis		Zebra mussel	Aquatic	aquatic					North America	USA		Unspecified	Country	1993	Year	1993	Unspecified	1993	1993	Potentially ongoing	60000000			1.01809e+08	1.01809e+08	60000000	1.01809e+08	1.01809e+08	USD	1993	Publication year	Observed
1754	TC	346	Harmful Non-Indigenous Species in the United States	U.S. Congress, Office of Technology Assessment		1993	English	Report	NA	Yes	Animalia	Mollusca	Bivalvia	Myida	Dreissenidae	Dreissena	Dreissena polymorpha/Dreissena bugensis		Zebra mussel	Aquatic	aquatic					North America	USA		Unspecified	Country	1993	Year	1993	1993	1993	1993	One-time	800000000			1357454860	1357454860	800000000	1357454860	1357454860	USD	1993	Publication year	Observed
1755	Go	116	Working Paper: The Economic Impacts of Aquatic Invasive Species: A Review of the Literature	Sabrina J. Lovell and Susan F. Stone		2005	English	Official report	NA	No	Animalia	Mollusca	Bivalvia	Myida	Dreissenidae	Dreissena	Dreissena polymorpha/Dreissena bugensis		Zebra mussel	Aquatic	aquatic					North America	USA		Unspecified	Country	10 years	Period	1995	2005	1995	2005	One-time	3100000000			4291438488	4291438488	310000000	4.29144e+08	4.29144e+08	USD	2001	Publication year	Observed
1756	Go	116	Working Paper: The Economic Impacts of Aquatic Invasive Species: A Review of the Literature	Sabrina J. Lovell and Susan F. Stone		2005	English	Official report	NA	No	Animalia	Mollusca	Bivalvia	Myida	Dreissenidae	Dreissena	Dreissena polymorpha/Dreissena bugensis		Zebra mussel	Aquatic	aquatic					North America	USA		Unspecified	Unit (46 plants)	1993	Year	1993	1993	1993	1993	Potentially ongoing	100000000			1.69682e+08	1.69682e+08	100000000	1.69682e+08	1.69682e+08	USD	1993	Publication year	Observed
1757	Go	116	Working Paper: The Economic Impacts of Aquatic Invasive Species: A Review of the Literature	Sabrina J. Lovell and Susan F. Stone		2005	English	Official report	NA	No	Animalia	Mollusca	Bivalvia	Myida	Dreissenidae	Dreissena	Dreissena polymorpha/Dreissena bugensis		Zebra mussel	Aquatic	aquatic					North America	USA		Unspecified	Unit (plant)	1999	Year	1999	1999	1999	1999	One-time	452500	83000	822000	665866	665866	452500	665866	665866	USD	1999	Publication year	Observed
1758	Go	116	Working Paper: The Economic Impacts of Aquatic Invasive Species: A Review of the Literature	Sabrina J. Lovell and Susan F. Stone		2005	English	Official report	NA	No	Animalia	Mollusca	Bivalvia	Myida	Dreissenidae	Dreissena	Dreissena polymorpha/Dreissena bugensis		Zebra mussel	Aquatic	aquatic					North America	USA		Great Lakes	Unit (water user)	1997	Year	1997	1997	1997	1997	One-time	375000	350000	400000	572650	572650	375000	572650	572650	USD	1997	Publication year	Observed
1759	Go	12	California Aquatic Invasive Species Rapid Response Fund : An Economic Evaluation	Cardno ENTRIX, Andy Cohen		2011	English	Official report	NA	Yes	Animalia	Chordata	Actinopterygii	Anabantiformes	Channidae	Channa	Channa argus		Northen snakehead	Aquatic	aquatic					North America	USA		Maryland	Unit (Several small ponds)	2005	Year	2005	2005	2005	2005	One-time	110000			138066	138066	110000	138066	138066	USD	2005	Publication year	Observed
1760	Go	12	California Aquatic Invasive Species Rapid Response Fund : An Economic Evaluation	Cardno ENTRIX, Andy Cohen		2011	English	Official report	NA	Yes	Plantae	Tracheophyta	Liliopsida	Hyrocharitaceae	Hydrocharitaceae	Hydrilla	Hydrilla verticillata		Hydrilla	Aquatic	aquatic					North America	USA		Florida	Site	1993	Year	1993	1993	1993	1993	One-time	14500000			2.46039e+07	2.46039e+07	14500000	2.46039e+07	2.46039e+07	USD	1993	Publication year	Observed
1761	Go	12	California Aquatic Invasive Species Rapid Response Fund : An Economic Evaluation	Cardno ENTRIX, Andy Cohen		2011	English	Official report	NA	Yes	Plantae	Tracheophyta	Liliopsida	Hyrocharitaceae	Hydrocharitaceae	Hydrilla	Hydrilla verticillata		Hydrilla	Aquatic	aquatic					North America	USA		Florida	Site	1980-2005	Period	1980	2005	1980	2005	One-time	180960000			2.27131e+08	2.27131e+08	6960000	8.73582e+06	8.73582e+06	USD	2005	Publication year	Observed
1762	Go	12	California Aquatic Invasive Species Rapid Response Fund : An Economic Evaluation	Cardno ENTRIX, Andy Cohen		2011	English	Official report	NA	Yes	Plantae	Tracheophyta	Liliopsida	Hyrocharitaceae	Hydrocharitaceae	Hydrilla	Hydrilla verticillata		Hydrilla	Aquatic	aquatic					North America	USA		Indiana	Site	Unspecified	Year	Unspecified	Unspecified	2011	2011	One-time	700000			762800	762800	700000	762800	762800	USD	2011	Publication year	Observed
1763	TC	535	Summary of a Survey of the Literature on the Economic Impact of Aquatic Weeds	Rockwell, H.W. Jr. 2003. “Summary of a Survey of the Literature on the Economic Impact of Aquatic Weeds.” Report for the Aquatic Ecosystem Restoration Foundation. August. http://www.aquatics.org/pubs/economics.htm.		2003	English	Official report	Lynch, J. J., J. E. King, T. K. Chamberlain, and Arthur L. Smith, Jr, Effects of Aquatic Weed Infestations on the Fish and Wildlife of the Gulf States, US Department of Interior, Fish and Wildlife Service, Special Scientific Report No. 39, c.1950.	No	Plantae	Tracheophyta	Liliopsida/Magnoliopsida	Liliales/Caryophyllales	Pontederiaceae/Chenopodiaceae	Eichhornia/Alternanthera	Eichhornia crassipes/Alternanthera philoxeroides		Water hyacinth/Alligator weeds	Aquatic	aquatic					North America	USA		Florida & Louisiana	Site	Late 1940s	Period	1945	1949	1945	1949	One-time	100000000					20000000			USD	1949	Effective	Observed
1764	TC	535	Summary of a Survey of the Literature on the Economic Impact of Aquatic Weeds	Rockwell, H.W. Jr. 2003. “Summary of a Survey of the Literature on the Economic Impact of Aquatic Weeds.” Report for the Aquatic Ecosystem Restoration Foundation. August. http://www.aquatics.org/pubs/economics.htm.		2003	English	Official report	USAID 1971	No	Plantae	Tracheophyta	Liliopsida	Commelinales	Pontederiaceae	Eichhornia	Eichhornia crassipes		Water hyacinth	Aquatic	aquatic					North America	USA		Louisiana	Site	1971	Year	1971	1971	1971	1971	One-time	35000000			2.11875e+08	2.11875e+08	35000000	2.11875e+08	2.11875e+08	USD	1971	Publication year	Observed
1765	TC	535	Summary of a Survey of the Literature on the Economic Impact of Aquatic Weeds	Rockwell, H.W. Jr. 2003. “Summary of a Survey of the Literature on the Economic Impact of Aquatic Weeds.” Report for the Aquatic Ecosystem Restoration Foundation. August. http://www.aquatics.org/pubs/economics.htm.		2003	English	Official report	Lembi, Carole A., Assessment of 2,4-D Use in Aquatic Systems in the United States, Chapter 12 in; Biologic and Economic Assessment of Benefits from Use of Phenoxy Herbicides in the United States, Special NAPIAP Report, Number 1-PA-96, 1996. AND Szmedra, Philip, Potential Economic Effects of Banning Phenoxy Herbicides in the United States, Chapter 4 in; Biologic and Economic Assessment of Benefits…	No	Plantae	Tracheophyta	Liliopsida/Magnoliopsida	Liliales/Haloragales	Pontederiaceae/Haloragaceae	Eichhornia/Myriophyllum	Eichhornia crassipes/Myriophyllum sp.		Water hyacinth/Watermilfoil	Aquatic	aquatic					North America	USA		Unspecified	Unit (223,000 acres)	1996	Year	1996	1996	1996	1996	One-time	17000000			2.6567e+07	2.6567e+07	17000000	2.6567e+07	2.6567e+07	USD	1996	Publication year	Observed
1766	Go	46	Economic Impacts of Invasive Species in the Pacific Northwest Economic Region	PNWER Invasive Species Working Group		2012	English	Official report	NA	Yes	Plantae	Tracheophyta	Liliopsida	Cyperales	Poaceae	Spartina	Spartina sp.		Spartina	Aquatic	semi-aquatic					North America	USA		Washington State	Site	1996-2012	Period	1996	2012	1996	2012	One-time	27625000			2.77582e+07	2.77582e+07	1.52941e+06	1.63283e+06	1.63283e+06	USD	2012	Publication year	Observed
1767	Go	46	Economic Impacts of Invasive Species in the Pacific Northwest Economic Region	PNWER Invasive Species Working Group		2012	English	Official report	NA	Yes	Plantae	Tracheophyta	Liliopsida	Cyperales	Poaceae	Spartina	Spartina sp.		Spartina	Aquatic	semi-aquatic					North America	USA		British Columbia	Site	2012-2017	Year	2012	2017	2012	2017	One-time	1200000			213524	213524	200000	213524	213524	USD	2012	Publication year	Observed
1768	Go	46	Economic Impacts of Invasive Species in the Pacific Northwest Economic Region	PNWER Invasive Species Working Group		2012	English	Official report	NA	Yes	Animalia	Mollusca	Bivalvia	Myida	Dreissenidae	Dreissena	Dreissena polymorpha/Dreissena bugensis		Zebra mussel/Quagga mussel	Aquatic	aquatic					North America	USA		Idaho	Site	2009	Year	2009	2009	2009	2009	One-time	94474000			1.07941e+08	1.07941e+08	94474000	1.07941e+08	1.07941e+08	USD	2009	Publication year	Observed
1769	GS	35	Beyond ballast water: aquarium and ornamental trades as sources of invasive species in aquatic ecosystems	Padilla & Williams		2004	English	Peer-reviewed article	NA	Yes	Plantae	Chlorophyta	Ulvophyceae	Bryopsidales	Caulerpaceae	Caulerpa	Caulerpa taxifolia		Killer algae	Aquatic	aquatic					North America	USA		California	Site	2000-2002	Period	2000	2002	2000	2002	One-time	12300000			1.67615e+07	1.67615e+07	4100000	5.58716e+06	5.58716e+06	USD	2002	Effective	Observed
1770	Go	101	The Spatial Dynamics of the Economic Impacts of an Aquatic Invasive Species: An Empirical Analysis	Katherine Y. Zipp, David J. Lewis, Bill Provencher, and Jake Vander Zanden		2017	English	Official report	NA	Yes	Plantae	Tracheophyta	Magnoliopsida	Saxifragales	Haloragaceae	Myriophyllum	Myriophyllum spicatum		Eurasian milfoil	Aquatic	aquatic					North America	USA		Wisconsin Northen Highlands Lake District	Unit (lake)	1998-2013	Period	1998	2013	1998	2013	One-time	1632000	3870928	33418656	1.71721e+06	1.71721e+06	102000	107325	107325	USD	2013	Effective	Potential
1779	TC	557	The ecological impact and management history of three invasive alien plant species in Florida	Schmitz DC, Schardt JD, Leslie AJ, Dray Jr FA, Osborne JA & Nelson BV		1993	English	Book chapter	European and Mediterranean Plant Protection Organization (2009). Eichhornia crassipes – National regulatory control systems. OEPP/EPPO, Bulletin OEPP/EPPO Bulletin 39, 460–464	No	Diverse/Unspecified	Diverse/Unspecified	Diverse/Unspecified	Diverse/Unspecified	Diverse/Unspecified	Diverse/Unspecified	Diverse/Unspecified		Invasive weeds	Aquatic	aquatic					North America	USA		Florida	Country	Unspecified	Year	Unspecified	Unspecified	1993	1993	Potentially ongoing	3000000			5.09046e+06	5.09046e+06	3000000	5.09046e+06	5.09046e+06	USD	1993	Publication year	Observed
1780	TC	557	The ecological impact and management history of three invasive alien plant species in Florida	Schmitz DC, Schardt JD, Leslie AJ, Dray Jr FA, Osborne JA & Nelson BV		1993	English	Book chapter	European and Mediterranean Plant Protection Organization (2009). Eichhornia crassipes – National regulatory control systems. OEPP/EPPO, Bulletin OEPP/EPPO Bulletin 39, 460–464	No	Diverse/Unspecified	Diverse/Unspecified	Diverse/Unspecified	Diverse/Unspecified	Diverse/Unspecified	Diverse/Unspecified	Diverse/Unspecified		Invasive weeds	Aquatic	aquatic					North America	USA		Louisiana	Country	Unspecified	Year	Unspecified	Unspecified	1993	1993	Potentially ongoing	2000000			3.39364e+06	3.39364e+06	2000000	3.39364e+06	3.39364e+06	USD	1993	Publication year	Observed
1781	TC	392	Kudzu	Britton, K. O., Orr, D., & Sun, J.		2002	English	Book chapter	Grebner, Donald L., Ezell, Andrew W. , Prevost, Jon D. and Gaddis, Deborah A.(2011) Kudzu Control and Impact on Monetary Returns to Non-Industrial Private Forest Landowners in Mississippi, Journal of Sustainable Forestry, 30: 3, 204 — 223	No	Plantae	Tracheophyta	Magnoliopsida	Fabales	Fabaceae	Pueraria	Pueraria montana var. lobata		Kudzu	Terrestrial	terrestrial					North America	USA		Unspecified	Country	Unspecified	Year	Unspecified	Unspecified	2002	2002	Potentially ongoing	1500000			2.04408e+06	2.04408e+06	1500000	2.04408e+06	2.04408e+06	USD	2002	Publication year	Observed
1788	TC	248	Don’t judge species on their origins	Mark A. Davis, Matthew K. Chew, Richard J. Hobbs, Ariel E. Lugo, John J. Ewel, Geerat J. Vermeij, James H. Brown, Michael L. Rosenzweig, Mark R. Gardener, Scott P. Carroll, Ken Thompson, Steward T. A. Pickett, Juliet C. Stromberg, Peter Del Tredici, Katharine N. Suding, Joan G. Ehrenfeld, J. Philip Grime, Joseph Mascaro, John C. Briggs.		2011	English	Peer-reviewed article	NA	Yes	Plantae	Tracheophyta	Magnoliopsida	Caryophyllales	Tamaricaceae	Tamarix	Tamarix spp.		Tamarisks	Terrestrial	terrestrial					North America	USA		USA	Country	4 years (2005-2009)	Period	2005	2009	2005	2009	One-time	80000000			9.14041e+07	9.14041e+07	20000000	2.2851e+07	2.2851e+07	USD	2009	Effective	Observed
1794	WoS	15006	Potential Environmental Impacts and Economic Damages of Eurasian Watermilfoil (Myriophyllum spicatum) in Western Nevada and Northeastern California	Eiswerth, M. E., Donaldson, S. G., & Johnson, W. S.		2000	English	Peer-reviewed article	NA	Yes	Plantae	Tracheophyta	Magnoliopsida	Saxifragales	Haloragaceae	Myriophyllum	Myriophyllum spicatum		Eurasian watermilfoil	Aquatic	aquatic					North America	USA		Washington	Site	Unspecified	Year	1993	Unspecified	2000	2000	Potentially ongoing	1000000			1.42346e+06	1.42346e+06	1000000	1.42346e+06	1.42346e+06	USD	2000	Publication year	Observed
1795	WoS	15006	Potential Environmental Impacts and Economic Damages of Eurasian Watermilfoil (Myriophyllum spicatum) in Western Nevada and Northeastern California	Eiswerth, M. E., Donaldson, S. G., & Johnson, W. S.		2000	English	Peer-reviewed article	NA	Yes	Plantae	Tracheophyta	Magnoliopsida	Saxifragales	Haloragaceae	Myriophyllum	Myriophyllum spicatum		Eurasian watermilfoil	Aquatic	aquatic					North America	USA	California	Vicinity of Tahoe Keys marina, Lake Tahoe	Site	2000	Year	2000	Unspecified	2000	2000	Potentially ongoing	150000			213519	213519	150000	213519	213519	USD	2000	Publication year	Observed
1796	WoS	15006	Potential Environmental Impacts and Economic Damages of Eurasian Watermilfoil (Myriophyllum spicatum) in Western Nevada and Northeastern California	Eiswerth, M. E., Donaldson, S. G., & Johnson, W. S.		2000	English	Peer-reviewed article	NA	Yes	Plantae	Tracheophyta	Magnoliopsida	Saxifragales	Haloragaceae	Myriophyllum	Myriophyllum spicatum		Eurasian watermilfoil	Aquatic	aquatic					North America	USA		Vicinity of Tahoe Keys marina, Lake Tahoe	Site	Unspecified	Year	Unspecified	Unspecified	2000	2000	Potentially ongoing	112500	75000	150000	160139	160139	112500	160139	160139	USD	2000	Publication year	Observed
1797	TC	330	Final Report on the eradication of the invasive seaweed Caulerpa taxifolia from Agua Hedionda lagoon and Huntington harbour, California	Merkel and Associates, Inc.		2006	English	Official report	Diaz, S., Smith, J. R., Zaleski, S. F., & Murray, S. N. (2012). Effectiveness of the California state ban on the sale of Caulerpa species in aquarium retail stores in southern California. Environmental Management, 50(1), 89-96.	No	Plantae	Chlorophyta	Ulvophyceae	Bryopsidales	Caulerpaceae	Caulerpa	Caulerpa taxifolia		Green alga	Aquatic	aquatic					North America	USA		California	Site	Unspecified	Year	Unspecified	Unspecified	2006	2006	One-time	7700000			9.36259e+06	9.36259e+06	7700000	9.36259e+06	9.36259e+06	USD	2006	Publication year	Observed
1804	TC	166	Alien forest pests: context for the Canadian Forest Service’s Science Program	Canadian Forest Service		1999	English	Official report	NA	Yes	Animalia	Arthropoda	Insecta	Coleoptera	Cerambycidae	Anoplophora	Anoplophora glabripennis		Asian long-horned beetle	Terrestrial	terrestrial					North America	USA		USA	Country	Unspecified	Year	Unspecified	Unspecified	1999	1999	Potentially ongoing	2300000			3.38451e+06	3.38451e+06	2300000	3.38451e+06	3.38451e+06	USD	1999	Publication year	Observed
1822	GS	237	Restoration Ecology and Invasive Riparian Plants: An Introduction to the Special Section on Tamarix spp. in Western North America	Patrick B. Shafroth and Mark K. Briggs		2008	English	Peer-reviewed article	NA	Yes	Plantae	Tracheophyta	Magnoliopsida	Caryophyllales/Rosales	Tamaricaceae/Elaeagnaceae	Tamarix/Elaeagnus	Tamarix spp./Elaeagnus angustifolia		Tamarisks/Russian olive	Terrestrial	terrestrial					North America	USA		USA	Country	Several years (Unspecified)	Period	2008	Unspecified	2008	2008	Potentially ongoing	80000000			9.10791e+07	9.10791e+07	80000000	9.10791e+07	9.10791e+07	USD	2008	Publication year	Potential
1826	TC	555	The distribution, biology and control of leafy spurge	Lacey, C. A., P. K. Fay, R. G. Lym, C. G. Messersmith, B. Maxwell, and H. P. Alley		1985	English	Peer-reviewed article	Nowierski, R. M. (1989). Status of screening activities for new insect and pathogen natural enemies of leafy spurge.	No	Plantae	Tracheophyta	Magnoliopsida	Malpighiales	Euphorbiaceae	Euphorbia	Euphorbia esula		Leafy spurge	Terrestrial	terrestrial					North America	USA		Montana	Site	Unspecified	Year	Unspecified	Unspecified	1985	1985	Potentially ongoing	1400000			3.19028e+06	3.19028e+06	1400000	3.19028e+06	3.19028e+06	USD	1985	Publication year	Observed
1827	TC	555	The distribution, biology and control of leafy spurge	Lacey, C. A., P. K. Fay, R. G. Lym, C. G. Messersmith, B. Maxwell, and H. P. Alley		1985	English	Peer-reviewed article	Nowierski, R. M. (1989). Status of screening activities for new insect and pathogen natural enemies of leafy spurge.	No	Plantae	Tracheophyta	Magnoliopsida	Malpighiales	Euphorbiaceae	Euphorbia	Euphorbia esula		Leafy spurge	Terrestrial	terrestrial					North America	USA		Montana	Site	Unspecified	Year	Unspecified	Unspecified	1985	1985	Potentially ongoing	2500000			5.69692e+06	5.69692e+06	2500000	5.69692e+06	5.69692e+06	USD	1985	Publication year	Observed
1830	TC	623	Weeds Today (USA)	Paul H. Schwartz		1981	English	Discussion paper	Monsanto New Zealand Limited (1984). The estimated costs of weeds to the agricultural sector of the New Zealand economy. A discussion paper prepared by Monsanto New Zealand Limited.	No	Plantae	Diverse/Unspecified	Diverse/Unspecified	Diverse/Unspecified	Diverse/Unspecified	Diverse/Unspecified	Diverse/Unspecified		IAS plants - “weeds”	Terrestrial	terrestrial					North America	USA		USA	Country	Unspecified	Year	Unspecified	Unspecified	1981	1981	One-time	16200000000			60872824476	60872824476	16200000000	60872824476	60872824476	USD	1978	Effective	Observed
1859	WoS	14200	An ounce of prevention or a pound of cure: bioeconomic risk analysis of invasive species	Leung, B., Lodge, D. M., Finnoff, D., Shogren, J. F., Lewis, M. A., & Lamberti, G.		2002	English	Peer-reviewed article	NA	Yes	Diverse/Unspecified	Diverse/Unspecified	Diverse/Unspecified	Diverse/Unspecified	Diverse/Unspecified	Diverse/Unspecified	Diverse/Unspecified		Diverse (all aquatic IAS)	Aquatic	aquatic					North America	USA		USA	Country	2001	Year	2001	2001	2001	2001	One-time	825000			1.12425e+06	1.12425e+06	825000	1.12425e+06	1.12425e+06	USD	2002	Publication year	Observed
1860	TC	315	European Corn Borer Ecology and Management	C. E. Mason et al.		1996	English	Book	Hutchison, W. D., Burkness, E. C., Mitchell, P. D., Moon, R. D., Leslie, T. W., Fleischer, S. J., ... & Hellmich, R. L. (2010). Areawide suppression of European corn borer with Bt maize reaps savings to non-Bt maize growers. Science, 330(6001), 222-225.	No	Animalia	Arthropoda	Insecta	Lepidoptera	Crambidae	Ostrinia	Ostrinia nubilalis		European corn borer	Terrestrial	terrestrial					North America	USA		USA	Country	Unspecified	Year	Unspecified	Unspecified	1996	1996	Potentially ongoing	1000000000			1562764318	1562764318	1000000000	1562764318	1562764318	USD	1996	Publication year	Observed
1861	TC	178	An economic evaluation of control methods for diffuse and spotted knapweed in western Canada	Harris, P., & Cranston, R.		1979	English	Peer-reviewed article	NA	Yes	Plantae	Tracheophyta	Magnoliopsida	Asterales	Asteraceae	Centaurea	Centaurea diffusa		Diffuse and spotted knapweed	Terrestrial	terrestrial					North America	Canada		Western Canada	Site	Potential one-time investment (Unspecified period)	Year	Unspecified	Unspecified	1979	1979	One-time	1800000			5.18978e+06	6.42581e+06	1800000	5.18978e+06	6.42581e+06	CAD	1979	Publication year	Potential
1862	TC	178	An economic evaluation of control methods for diffuse and spotted knapweed in western Canada	Harris, P., & Cranston, R.		1979	English	Peer-reviewed article	NA	Yes	Plantae	Tracheophyta	Magnoliopsida	Asterales	Asteraceae	Centaurea	Centaurea diffusa		Diffuse and spotted knapweed	Terrestrial	terrestrial					North America	Canada		Western Canada	Site	1972	Year	1972	Unspecified	1972	1972	Potentially ongoing	350000			1.00912e+06	1.24946e+06	350000	1.00912e+06	1.24946e+06	CAD	1979	Publication year	Observed
1863	TC	178	An economic evaluation of control methods for diffuse and spotted knapweed in western Canada	Harris, P., & Cranston, R.		1979	English	Peer-reviewed article	NA	Yes	Plantae	Tracheophyta	Magnoliopsida	Asterales	Asteraceae	Centaurea	Centaurea diffusa		Diffuse and spotted knapweed	Terrestrial	terrestrial					North America	Canada		Western Canada	Site	Unspecified	Year	Unspecified	Unspecified	1979	1979	Potentially ongoing	58000000			1.67226e+08	2.07054e+08	58000000	1.67226e+08	2.07054e+08	CAD	1979	Publication year	Potential
1864	TC	178	An economic evaluation of control methods for diffuse and spotted knapweed in western Canada	Harris, P., & Cranston, R.		1979	English	Peer-reviewed article	NA	Yes	Plantae	Tracheophyta	Magnoliopsida	Asterales	Asteraceae	Centaurea	Centaurea diffusa		Diffuse and spotted knapweed	Terrestrial	terrestrial					North America	Canada		British Columbia	Site	Unspecified	Year	Unspecified	Unspecified	1979	1979	Potentially ongoing	13000000			3.74817e+07	4.64086e+07	13000000	3.74817e+07	4.64086e+07	CAD	1979	Publication year	Potential
1865	TC	178	An economic evaluation of control methods for diffuse and spotted knapweed in western Canada	Harris, P., & Cranston, R.		1979	English	Peer-reviewed article	NA	Yes	Plantae	Tracheophyta	Magnoliopsida	Asterales	Asteraceae	Centaurea	Centaurea diffusa		Diffuse and spotted knapweed	Terrestrial	terrestrial					North America	Canada		British Columbia	Site	1976	Year	1976	1976	1976	1976	One-time	204000			588175	728258	204000	588175	728258	CAD	1979	Publication year	Observed
1866	TC	178	An economic evaluation of control methods for diffuse and spotted knapweed in western Canada	Harris, P., & Cranston, R.		1979	English	Peer-reviewed article	NA	Yes	Plantae	Tracheophyta	Magnoliopsida	Asterales	Asteraceae	Centaurea	Centaurea diffusa		Diffuse and spotted knapweed	Terrestrial	terrestrial					North America	Canada		British Columbia	Site	Potential one-time investment (Unspecified period)	Year	Unspecified	Unspecified	1979	1979	One-time	16950000	900000	33000000	4.88704e+07	6.05097e+07	16950000	4.88704e+07	6.05097e+07	CAD	1979	Publication year	Potential
1867	TC	620	Water management and the valuation of indirect environmental services	Kaiser, B., & Roumasset, J.		2000	English	Peer-reviewed article	NA	Yes	Diverse/Unspecified	Diverse/Unspecified	Diverse/Unspecified	Diverse/Unspecified	Diverse/Unspecified	Diverse/Unspecified	Diverse/Unspecified			Aquatic/Terrestrial	diverse/Unspecified					Oceania/Pacific Islands	USA	Hawaii	Ko‘olau watershed, Hawaii	Site	1997	Year	1997	Unspecified	1997	1997	Potentially ongoing	100000			152707	152707	100000	152707	152707	USD	1997	Effective	Observed
1868	TC	620	Water management and the valuation of indirect environmental services	Kaiser, B., & Roumasset, J.		2000	English	Peer-reviewed article	NA	Yes	Diverse/Unspecified	Diverse/Unspecified	Diverse/Unspecified	Diverse/Unspecified	Diverse/Unspecified	Diverse/Unspecified	Diverse/Unspecified			Aquatic/Terrestrial	diverse/Unspecified					Oceania/Pacific Islands	USA	Hawaii	Ko‘olau watershed, Hawaii	Site	1997	Year	1997	Unspecified	1997	1997	Potentially ongoing	42100000			6.42895e+07	6.42895e+07	42100000	6.42895e+07	6.42895e+07	USD	1997	Effective	Observed
1937	TC	346	Harmful Non-Indigenous Species in the United States	U.S. Congress, Office of Technology Assessment		1993	English	Official report	NA	Yes	Animalia	Diverse/Unspecified	Diverse/Unspecified	Diverse/Unspecified	Diverse/Unspecified	Diverse/Unspecified	Diverse/Unspecified		Diverse (fish and wildlife)	Aquatic/Terrestrial	diverse/Unspecified					North America	USA		USA	Country	Unspecified	Year	Unspecified	Unspecified	1993	1993	Potentially ongoing	3000000			5.09046e+06	5.09046e+06	3000000	5.09046e+06	5.09046e+06	USD	1993	Publication year	Observed
1938	TC	346	Harmful Non-Indigenous Species in the United States	U.S. Congress, Office of Technology Assessment		1993	English	Official report	NA	Yes	Diverse/Unspecified	Diverse/Unspecified	Diverse/Unspecified	Diverse/Unspecified	Diverse/Unspecified	Diverse/Unspecified	Diverse/Unspecified		Diverse (agricultural plants and pests)	Terrestrial	terrestrial					North America	USA		USA	Country	Unspecified	Year	Unspecified	Unspecified	1993	1993	Potentially ongoing	80000000			135745486	135745486	80000000	135745486	135745486	USD	1993	Publication year	Observed
1939	TC	346	Harmful Non-Indigenous Species in the United States	U.S. Congress, Office of Technology Assessment		1993	English	Official report	NA	Yes	Plantae	Tracheophyta	Magnoliopsida	Asterales	Asteraceae	Centaurea	Centaurea diffusa/Centaurea maculosa		Diffuse knapweed/Spotted knapweed	Diverse/Unspecified	terrestrial					North America	USA		North and South Carolina	Site	1991	Year	1991	1991	1991	1991	One-time	5200000			9.35903e+06	9.35903e+06	5200000	9.35903e+06	9.35903e+06	USD	1991	Effective	Observed
1940	TC	440	Non-Indigenous Species in the United States: Economic Consequences	M. Cochran		1992	English	Official report	U.S. Congress, Office of Technology Assessment, Harmful Non-Indigenous Species in the United States, OTA-F-565 (Washington, DC: U.S. Government Printing Office, September 1993).	No	Animalia	Arthropoda	Insecta	Hemiptera	Aphididae	Diuraphis	Diuraphis noxia		Russian wheat aphid	Terrestrial	terrestrial					North America	USA		USA	Country	3 years (1987-1989)	Period	1987	1989	1987	1989	Potentially ongoing	400000000			1079888025	1079888025	200000000	3.59963e+08	3.59963e+08	USD	1991	Effective	Observed
1941	TC	346	Harmful Non-Indigenous Species in the United States	U.S. Congress, Office of Technology Assessment		1993	English	Official report	NA	Yes	Animalia	Chordata	Actinopterygii	Salmoniformes	Salmonidae	Salmo	Salmo trutta		Brown trout	Aquatic	aquatic					North America	USA		California	Site	Since 1985	Period	1985	Unspecified	1985	1993	Potentially ongoing	1000000			1.69682e+06	1.69682e+06	111111	188535	188535	USD	1993	Publication year	Observed
1942	TC	440	Non-Indigenous Species in the United States: Economic Consequences	M. Cochran		1992	English	Official report	U.S. Congress, Office of Technology Assessment, Harmful Non-Indigenous Species in the United States, OTA-F-565 (Washington, DC: U.S. Government Printing Office, September 1993).	No	Animalia	Arthropoda	Insecta	Coleoptera	Curculionidae	Anthonomus	Anthonomus grandis		Cotton boll weevil	Terrestrial	terrestrial					North America	USA		USA	Country	41 years (1909-1949)	Period	1909	1949	1909	1949	Potentially ongoing	4.87805e+07			89990668788	89990668788	1219512195	2194894361	2194894361	USD	1991	Effective	Observed
1943	TC	273	Economic Impact of Leafy Spurge on Grazing Lands in the Northern Great Plains	Bangsund, D.A. and Leistritz, F. L.,		1991	English	Official report	U.S. Congress, Office of Technology Assessment, Harmful Non-Indigenous Species in the United States, OTA-F-565 (Washington, DC: U.S. Government Printing Office, September 1993).	No	Plantae	Tracheophyta	Magnoliopsida	Malpighiales	Euphorbiaceae	Euphorbia	Euphorbia esula		Leafy spurge	Terrestrial	terrestrial					North America	USA		northern Great Plains	Site	1990	Year	1990	1990	1990	1990	Potentially ongoing	110000000			1.8665e+08	1.8665e+08	110000000	1.8665e+08	1.8665e+08	USD	1993	Publication year	Observed
1944	TC	346	Harmful Non-Indigenous Species in the United States	U.S. Congress, Office of Technology Assessment		1993	English	Official report	NA	Yes	Fungi	Basidiomycota	Pucciniomycetes	Pucciniales	Pucciniaceae	Puccinia	Puccinia recondita		Wheat rust fungus	Terrestrial	terrestrial					North America	USA		USA	Country	20 years (Unspecified period)	Year	1973	1993	1973	1993	Potentially ongoing	100000000			1.69682e+08	1.69682e+08	100000000	1.69682e+08	1.69682e+08	USD	1993	Publication year	Observed
1945	TC	346	Harmful Non-Indigenous Species in the United States	U.S. Congress, Office of Technology Assessment		1993	English	Official report	NA	Yes	Plantae	Diverse/Unspecified	Diverse/Unspecified	Diverse/Unspecified	Diverse/Unspecified	Diverse/Unspecified	Diverse/Unspecified		Diverse weeds	Terrestrial	terrestrial					North America	USA		USA	Country	3 years (1989-1991)	Year	1989	1991	1989	1991	Potentially ongoing	4100000000			6956956158	6956956158	4100000000	6956956158	6956956158	USD	1993	Publication year	Observed
1946	TC	346	Harmful Non-Indigenous Species in the United States	U.S. Congress, Office of Technology Assessment		1993	English	Official report	NA	Yes	Plantae	Diverse/Unspecified	Diverse/Unspecified	Diverse/Unspecified	Diverse/Unspecified	Diverse/Unspecified	Diverse/Unspecified		Diverse weeds	Terrestrial	terrestrial					North America	USA		USA	Country	3 years (1989-1991)	Year	1989	1991	1989	1991	Potentially ongoing	19600000000			33257644073	33257644073	19600000000	33257644073	33257644073	USD	1993	Publication year	Potential
1947	TC	346	Harmful Non-Indigenous Species in the United States	U.S. Congress, Office of Technology Assessment		1993	English	Official report	NA	Yes	Plantae	Diverse/Unspecified	Diverse/Unspecified	Diverse/Unspecified	Diverse/Unspecified	Diverse/Unspecified	Diverse/Unspecified		Diverse weeds	Terrestrial	terrestrial					North America	USA		USA	Country	Unspecified	Year	Unspecified	Unspecified	1993	1993	Potentially ongoing	2500000000	2000000000	3000000000	4242046438	4242046438	2500000000	4242046438	4242046438	USD	1993	Publication year	Observed
1948	TC	346	Harmful Non-Indigenous Species in the United States	U.S. Congress, Office of Technology Assessment		1993	English	Official report	NA	Yes	Plantae	Diverse/Unspecified	Diverse/Unspecified	Diverse/Unspecified	Diverse/Unspecified	Diverse/Unspecified	Diverse/Unspecified		Diverse weeds	Terrestrial	terrestrial					North America	USA		USA	Country	Unspecified	Year	Unspecified	Unspecified	1993	1993	Potentially ongoing	1900000000	1500000000	2300000000	3223955293	3223955293	1900000000	3223955293	3223955293	USD	1993	Publication year	Observed
1949	TC	346	Harmful Non-Indigenous Species in the United States	U.S. Congress, Office of Technology Assessment		1993	English	Official report	NA	Yes	Plantae	Diverse/Unspecified	Diverse/Unspecified	Diverse/Unspecified	Diverse/Unspecified	Diverse/Unspecified	Diverse/Unspecified		Diverse weeds	Terrestrial	terrestrial					North America	USA		USA	Country	Unspecified	Year	Unspecified	Unspecified	1993	1993	Potentially ongoing	1000000000			1696818575	1696818575	1000000000	1696818575	1696818575	USD	1993	Publication year	Observed
1950	TC	346	Harmful Non-Indigenous Species in the United States	U.S. Congress, Office of Technology Assessment		1993	English	Official report	NA	Yes	Animalia	Arthropoda	Insecta	Coleoptera	Curculionidae	Hypera	Hypera postica		Alfalfa weevil	Terrestrial	terrestrial					North America	USA		USA	Country	1990	Year	1990	Unspecified	1990	1990	Potentially ongoing	500000000			8.48409e+08	8.48409e+08	500000000	8.48409e+08	8.48409e+08	USD	1990	Effective	Observed
1951	TC	346	Harmful Non-Indigenous Species in the United States	U.S. Congress, Office of Technology Assessment		1993	English	Official report	NA	Yes	Animalia	Arthropoda	Insecta	Hemiptera	Aphididae	Diuraphis	Diuraphis noxia		Russian wheat aphid	Terrestrial	terrestrial					North America	USA		USA	Country	1988	Year	1988	Unspecified	1988	1988	Potentially ongoing	172800000			2.9321e+08	2.9321e+08	172800000	2.9321e+08	2.9321e+08	USD	1993	Publication year	Observed
1952	TC	346	Harmful Non-Indigenous Species in the United States	U.S. Congress, Office of Technology Assessment		1993	English	Official report	NA	Yes	Animalia	Arthropoda	Insecta	Lepidoptera	Gelechiidae	Pectinophora	Pectinophora gossypiella		Pink bollworm	Terrestrial	terrestrial					North America	USA		California	Site	1960-1988	Year	1960	1988	1960	1988	Potentially ongoing	16600000			2.81672e+07	2.81672e+07	16600000	2.81672e+07	2.81672e+07	USD	1993	Publication year	Observed
1953	TC	353	Honey Bee Pests—A Threat to the Vitality of U.S. Agriculture	National Association of State Departments of Agriculture		1991	English	Official report	U.S. Congress, Office of Technology Assessment, Harmful Non-Indigenous Species in the United States, OTA-F-565 (Washington, DC: U.S. Government Printing Office, September 1993).	No	Animalia	Arthropoda	Arachnida	Prostigmata/Mesostigmata	Tarsonemidae/Varroidae	Acarapis/Varroa	Acarapis woodi/Varroa jacobsoni		Tracheal mite and the varroa mite	Terrestrial	terrestrial					North America	USA		USA	Country	Unspecified	Year	Unspecified	Unspecified	1991	1991	Potentially ongoing	160000000			2.8797e+08	2.8797e+08	160000000	2.8797e+08	2.8797e+08	USD	1991	Publication year	Potential
1954	TC	346	Harmful Non-Indigenous Species in the United States	U.S. Congress, Office of Technology Assessment		1993	English	Official report	NA	Yes	Animalia	Arthropoda	Insecta	Lepidoptera	Erebidae	Lymantria	Lymantria dispar		European gypsy moth	Terrestrial	terrestrial					North America	USA		USA	Country	1981	Year	1981	1981	1981	1981	Potentially ongoing	764000000			1296369391	1296369391	764000000	1296369391	1296369391	USD	1993	Publication year	Observed
1955	TC	340	Great Lakes Fishery Commission—Actions Needed to Support an Expanded Program	U.S. Congress, General Accounting Office		1992	English	Official report	U.S. Congress, Office of Technology Assessment, Harmful Non-Indigenous Species in the United States, OTA-F-565 (Washington, DC: U.S. Government Printing Office, September 1993).	No	Animalia	Chordata	Cephalaspidomorphi	Petromyzontiformes	Petromyzontidae	Petromyzon	Petromyzon marinus		Sea lamprey	Aquatic	aquatic					North America	USA		Great Lakes	Site	Unspecified	Year	Unspecified	Unspecified	1992	1992	Potentially ongoing	10000000			1.69682e+07	1.69682e+07	10000000	1.69682e+07	1.69682e+07	USD	1993	Publication year	Observed
1956	TC	593	The Report of the Evaluation of the Great Lakes Fishery Commission by the Bi-National Evaluation Team Volume 2, An Analysis of the Economic Contribution of the Great Lakes Sea Lamprey Program	Spaulding, W. M., Jr. and McPhee, R. J.—Bi-National Evaluation Team (submitted by)		1989	English	Official report	U.S. Congress, Office of Technology Assessment, Harmful Non-Indigenous Species in the United States, OTA-F-565 (Washington, DC: U.S. Government Printing Office, September 1993).	No	Animalia	Chordata	Cephalaspidomorphi	Petromyzontiformes	Petromyzontidae	Petromyzon	Petromyzon marinus		Sea lamprey	Aquatic	aquatic					North America	USA		Great Lakes	Site	Unspecified	Year	Unspecified	Unspecified	1989	1989	Potentially ongoing	500000000			8.48409e+08	8.48409e+08	500000000	8.48409e+08	8.48409e+08	USD	1993	Publication year	Potential
1957	TC	510	Ruffe in the Great Lakes: A Threat to North American Fisheries	Great Lakes Fishery Commission		1992	English	Official report	U.S. Congress, Office of Technology Assessment, Harmful Non-Indigenous Species in the United States, OTA-F-565 (Washington, DC: U.S. Government Printing Office, September 1993).	No	Animalia	Chordata	Actinopterygii	Perciformes	Percidae	Gymnocephalus	Gymnocephalus cernua		European ruffe	Aquatic	aquatic					North America	USA		Great Lakes	Site	Unspecified	Year	Unspecified	Unspecified	1992	1992	Potentially ongoing	90000000			1.52714e+08	1.52714e+08	90000000	1.52714e+08	1.52714e+08	USD	1993	Publication year	Potential
1958	TC	346	Harmful Non-Indigenous Species in the United States	U.S. Congress, Office of Technology Assessment		1993	English	Official report	NA	Yes	Animalia	Mollusca	Bivalvia	Venerida	Cyrenidae	Corbicula	Corbicula fluminea		Asian clam	Aquatic	aquatic					North America	USA		USA	Country	Early 1980s	Year	1980	1985	1980	1985	Potentially ongoing	1000000000			1696818575	1696818575	1000000000	1696818575	1696818575	USD	1993	Publication year	Observed
1959	TC	346	Harmful Non-Indigenous Species in the United States	U.S. Congress, Office of Technology Assessment		1993	English	Official report	NA	Yes	Animalia	Mollusca	Bivalvia	Myida	Dreissenidae	Dreissena	Dreissena polymorpha		Zebra mussel	Aquatic	aquatic					North America	USA		USA	Country	10 years (Unspecified period)	Period	1993	2003	1993	2003	Potentially ongoing	3100000000			5579421465	5579421465	310000000	5.57942e+08	5.57942e+08	USD	1991	Effective	Potential
1960	TC	346	Harmful Non-Indigenous Species in the United States	U.S. Congress, Office of Technology Assessment		1993	English	Official report	NA	Yes	Animalia	Mollusca	Bivalvia	Myida	Dreissenidae	Dreissena	Dreissena polymorpha		Zebra mussel	Aquatic	aquatic					North America	USA		USA	Country	Unspecified	Year	Unspecified	Unspecified	1993	1993	Potentially ongoing	800000000			1357454860	1357454860	800000000	1357454860	1357454860	USD	1993	Publication year	Observed
1961	TC	346	Harmful Non-Indigenous Species in the United States	U.S. Congress, Office of Technology Assessment		1993	English	Official report	NA	Yes	Animalia	Mollusca	Bivalvia	Myida	Dreissenidae	Dreissena	Dreissena polymorpha		Zebra mussel	Aquatic	aquatic					North America	USA		USA	Country	Unspecified	Year	Unspecified	Unspecified	1993	1993	Potentially ongoing	60000000			1.01809e+08	1.01809e+08	60000000	1.01809e+08	1.01809e+08	USD	1993	Publication year	Observed
1962	TC	616	Vegetation Management Study – Lower Colorado River	U.S. Department of the Interior, Bureau of Reclamation, Lower Colorado Region		1992	English	Official report	U.S. Congress, Office of Technology Assessment, Harmful Non-Indigenous Species in the United States, OTA-F-565 (Washington, DC: U.S. Government Printing Office, September 1993).	No	Plantae	Tracheophyta	Magnoliopsida	Caryophyllales	Tamaricaceae	Tamarix	Tamarix spp.		Salt cedar	Terrestrial	terrestrial					North America	USA		Lower Colorado River	Site	Unspecified	Year	Unspecified	Unspecified	1992	1992	One-time	247500000	45000000	450000000	4.19963e+08	4.19963e+08	247500000	4.19963e+08	4.19963e+08	USD	1993	Publication year	Potential
1963	TC	273	Economic Impact of Leafy Spurge on Grazing Lands in the Northern Great Plains	Bangsund, D.A. and Leistritz, F. L.,		1991	English	Official report	U.S. Congress, Office of Technology Assessment, Harmful Non-Indigenous Species in the United States, OTA-F-565 (Washington, DC: U.S. Government Printing Office, September 1993).	No	Plantae	Tracheophyta	Magnoliopsida	Malpighiales	Euphorbiaceae	Euphorbia	Euphorbia esula		Leafy spurge	Terrestrial	terrestrial					North America	USA		Montana, Wyoming and Dakotas	Site	6 years (1990-1995)	Period	1990	1995	1990	1995	Potentially ongoing	2.66667e+07			4.52485e+07	4.52485e+07	5.33333e+06	9.0497e+06	9.0497e+06	USD	1993	Publication year	Potential
1964	TC	346	Harmful Non-Indigenous Species in the United States	U.S. Congress, Office of Technology Assessment		1993	English	Official report	NA	Yes	Plantae	Tracheophyta	Pinopsida	Pinales	Pinaceae	Larix	Larix spp.		Larch	Terrestrial	terrestrial					North America	USA		USA	Country	Unspecified	Year	Unspecified	Unspecified	1993	1993	One-time	500000			848409	848409	500000	848409	848409	USD	1993	Publication year	Observed
1965	TC	346	Harmful Non-Indigenous Species in the United States	U.S. Congress, Office of Technology Assessment		1993	English	Official report	NA	Yes	Animalia	Arthropoda	Insecta	Lepidoptera	Erebidae	Lymantria	Lymantria dispar/Lymantria monacha		Asian gypsy moth and the nun moth	Terrestrial	terrestrial					North America	USA		Nortwest	Site	1990-2004	Period	1990	2004	1990	2004	Potentially ongoing	697500000	525000000	870000000	83691321973	83691321973	3100000000	5579421465	5579421465	USD	1991	Effective	Potential
1966	TC	346	Harmful Non-Indigenous Species in the United States	U.S. Congress, Office of Technology Assessment		1993	English	Official report	NA	Yes	Diverse/Unspecified	Diverse/Unspecified	Diverse/Unspecified	Diverse/Unspecified	Diverse/Unspecified	Diverse/Unspecified	Diverse/Unspecified			Terrestrial	terrestrial					North America	USA		USA	Country	1992	Year	1992	1992	1992	1992	One-time	105787000			1.79501e+08	1.79501e+08	105787000	1.79501e+08	1.79501e+08	USD	1993	Publication year	Observed
1967	TC	346	Harmful Non-Indigenous Species in the United States	U.S. Congress, Office of Technology Assessment		1993	English	Official report	NA	Yes	Plantae	Diverse/Unspecified	Diverse/Unspecified	Diverse/Unspecified	Diverse/Unspecified	Diverse/Unspecified	Diverse/Unspecified		Diverse weeds	Diverse/Unspecified	diverse/Unspecified					North America	USA		USA	Country	1992	Year	1992	1992	1992	1992	One-time	725000			1.23019e+06	1.23019e+06	725000	1.23019e+06	1.23019e+06	USD	1993	Publication year	Observed
1968	TC	346	Harmful Non-Indigenous Species in the United States	U.S. Congress, Office of Technology Assessment		1993	English	Official report	NA	Yes	Plantae	Diverse/Unspecified	Diverse/Unspecified	Diverse/Unspecified	Diverse/Unspecified	Diverse/Unspecified	Diverse/Unspecified		Diverse weeds	Diverse/Unspecified	diverse/Unspecified					North America	USA		USA	Country	1993	Year	1993	1993	1993	1993	One-time	412000			699089	699089	412000	699089	699089	USD	1993	Publication year	Observed
1969	TC	346	Harmful Non-Indigenous Species in the United States	U.S. Congress, Office of Technology Assessment		1993	English	Official report	NA	Yes	Plantae	Diverse/Unspecified	Diverse/Unspecified	Diverse/Unspecified	Diverse/Unspecified	Diverse/Unspecified	Diverse/Unspecified		Diverse weeds	Aquatic/Terrestrial	diverse/Unspecified					North America	USA		USA	Country	1993	Year	1993	1993	1993	1993	One-time	9500000			1.61198e+07	1.61198e+07	9500000	1.61198e+07	1.61198e+07	USD	1993	Publication year	Observed
1970	TC	346	Harmful Non-Indigenous Species in the United States	U.S. Congress, Office of Technology Assessment		1993	English	Official report	NA	Yes	Animalia	Arthropoda	Arachnida/Insecta	Hemiptera/Diptera/Thysanoptera/Prostigmata	Aphididae/Aleyrodidae/Tephritidae/Thripidae/Tarsonemidae	Diuraphis/Bemisia/Ceratitis/Taeniothrips/Acarapis	Diuraphis noxia/Bemisia tabaci/Ceratitis capitata/Taeniothrips inconsequens/Acarapis woodi		Russian wheat aphid/sweet potato whitefly/Mediterranean fruit fly/African honey bee/Pear thrips/Tracheal mites	Terrestrial	terrestrial					North America	USA		USA	Country	1993	Year	1993	1993	1993	1993	One-time	9000000			1.52714e+07	1.52714e+07	9000000	1.52714e+07	1.52714e+07	USD	1993	Publication year	Observed
1971	TC	346	Harmful Non-Indigenous Species in the United States	U.S. Congress, Office of Technology Assessment		1993	English	Official report	NA	Yes	Plantae	Tracheophyta/Unspecified	Magnoliopsida/Unspecified	Myrtales/Unspecified	Myrtaceae/Unspecified	Melaleuca/Unspecified	Melaleuca quinquenervia/Unspecified		Diverse plants (mainly Melaleuca quinquenervia and aquatic weeds)	Aquatic/Terrestrial	diverse/Unspecified					North America	USA		Florida	Site	1991	Year	1991	1991	1991	1991	One-time	200000			339364	339364	200000	339364	339364	USD	1993	Publication year	Observed
1972	TC	346	Harmful Non-Indigenous Species in the United States	U.S. Congress, Office of Technology Assessment		1993	English	Official report	NA	Yes	Diverse/Unspecified	Diverse/Unspecified	Diverse/Unspecified	Diverse/Unspecified	Diverse/Unspecified	Diverse/Unspecified	Diverse/Unspecified			Diverse/Unspecified	diverse/Unspecified					North America	USA		USA	Country	1990	Year	1990	1990	1990	1990	One-time	450000			763568	763568	450000	763568	763568	USD	1993	Publication year	Observed
1973	TC	346	Harmful Non-Indigenous Species in the United States	U.S. Congress, Office of Technology Assessment		1993	English	Official report	NA	Yes	Diverse/Unspecified	Diverse/Unspecified	Diverse/Unspecified	Diverse/Unspecified	Diverse/Unspecified	Diverse/Unspecified	Diverse/Unspecified			Diverse/Unspecified	diverse/Unspecified					North America	USA		USA	Country	1991	Year	1991	1991	1991	1991	One-time	550000			933250	933250	550000	933250	933250	USD	1993	Publication year	Observed
1974	TC	346	Harmful Non-Indigenous Species in the United States	U.S. Congress, Office of Technology Assessment		1993	English	Official report	NA	Yes	Animalia	Arthropoda	Insecta	Coleoptera	Rutelidae	Popillia	Popillia japonica		Japanese beetle	Terrestrial	terrestrial					North America	USA		USA	Country	1990	Year	1990	1990	1990	1990	One-time	338900			575052	575052	338900	575052	575052	USD	1993	Publication year	Observed
1975	TC	346	Harmful Non-Indigenous Species in the United States	U.S. Congress, Office of Technology Assessment		1993	English	Official report	NA	Yes	Diverse/Unspecified	Diverse/Unspecified	Diverse/Unspecified	Diverse/Unspecified	Diverse/Unspecified	Diverse/Unspecified	Diverse/Unspecified			Aquatic/Terrestrial	diverse/Unspecified					North America	USA		USA	Country	1992	Year	1992	1992	1992	1992	One-time	3294000			5.58932e+06	5.58932e+06	3294000	5.58932e+06	5.58932e+06	USD	1993	Publication year	Observed
1976	TC	346	Harmful Non-Indigenous Species in the United States	U.S. Congress, Office of Technology Assessment		1993	English	Official report	NA	Yes	Diverse/Unspecified	Diverse/Unspecified	Diverse/Unspecified	Diverse/Unspecified	Diverse/Unspecified	Diverse/Unspecified	Diverse/Unspecified			Aquatic/Terrestrial	diverse/Unspecified					North America	USA		USA	Country	1992	Year	1992	1992	1992	1992	One-time	500000			848409	848409	500000	848409	848409	USD	1993	Publication year	Observed
[truncated: 1,045 more rows]
[truncated: 15 more columns]

## Sheet: robust_dataset
	Impact_year	Cost_ID	Repository	Reference_ID	Reference_title	Authors	Abstract	Publication_year	Language	Type_of_material	Previous_materials	Availability	Kingdom	Phylum	Class	Order	Family	Genus	Species	Subspecies	Common_name	Environment	Environment_IAS	Island	HabitatVerbatim	Habitat	protectedArea	Geographic_region	Official_country	State.Province.Administrative_area	Location	Spatial_scale	Period_of_estimation	Time_range	Probable_starting_year	Probable_ending_year	Probable_starting_year_adjusted	Probable_ending_year_adjusted	Occurrence	Raw_cost_estimate_local_currency	Min_Raw_cost_estimate_local_currency	Max_Raw_cost_estimate_local_currency	Raw_cost_estimate_2017_USD_exchange_rate	Raw_cost_estimate_2017_USD_PPP	Cost_estimate_per_year_local_currency	Cost_estimate_per_year_2017_USD_exchange_rate	Cost_estimate_per_year_2017_USD_PPP	Currency	Applicable_year
[truncated: 2,122 more rows]
[truncated: 18 more columns]

[truncated: 2 more sheets: field_description, field_classification]
